# Supplementary material
Source: PubMed Central journal article supplement (PMC4261947)

**Glycoproteomics:  
the Identification of Different Glycosylation  
of the Prostate Specific Antigen  
at Normal and High Isoelectric Point  
by LC-MS/MS**

*Ehwang Song<sup>1</sup>, Anoop Mayampurath<sup>2</sup>, Chuan-Yih Yu<sup>2</sup>, Haixu Tang<sup>2</sup>, and Yehia Mechref<sup>1,\*</sup>*

<sup>1</sup>Department of Chemistry and Biochemistry, Texas Tech University, Lubbock, TX 79409

<sup>2</sup>School of Informatics & Computing, Indiana University, Bloomington, IN 47408

\*Corresponding author

Email: [yehia.mechref@ttu.edu](mailto:yehia.mechref@ttu.edu)

Tel: 806-742-3059

Fax: 806-742-1289

**Keywords:** Prostate specific antigen, PSA, N-linked glycosylation, glycopeptide, glycoproteomics, LC-MS/MS.

**Supplementary Figure 1.** Manual annotations of CID MS/MS of 38 glycopeptides from PSA or PSAH.

# HexNAc2Hex3dHex1

PSAH\_300ng\_5B\_masslists\_071312\_01 #584 RT: 17.99 AV: 1 NL: 5.83E3  
F: ITMS + c NSI d Full ms2 680.01@cid35.00 [175.00-2000.00]

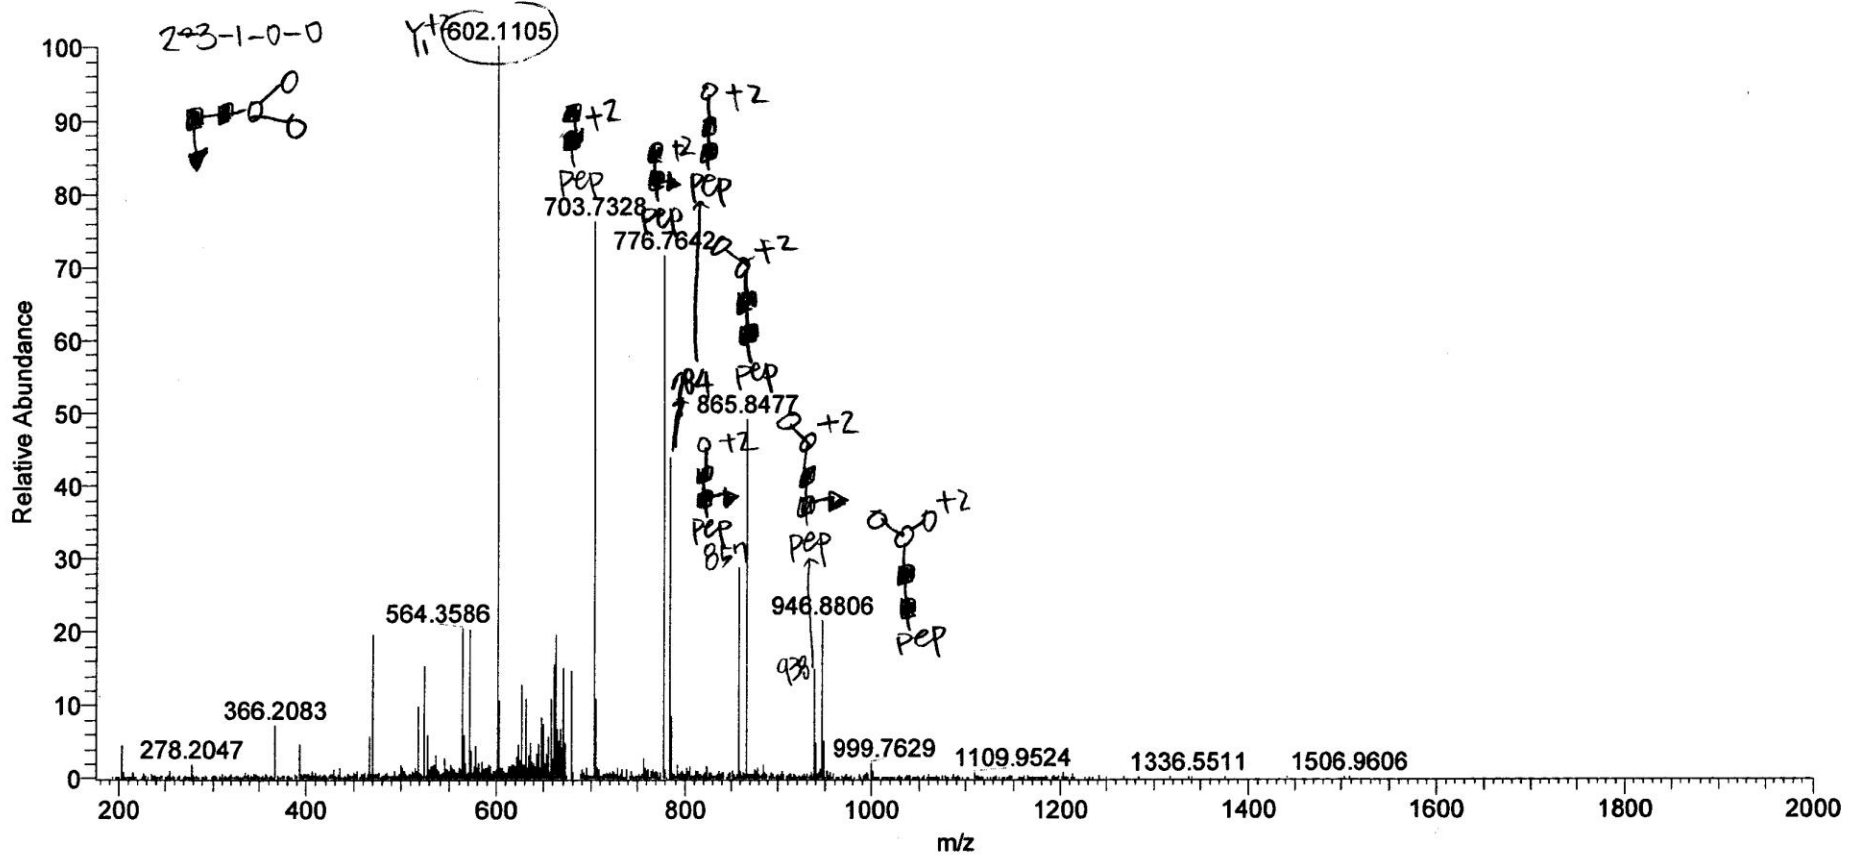

# HexNAc2Hex6s/p1

7/13/2011 11:35:40 AM

PSAH\_300ng\_5B\_masslists\_071312\_01 #721 RT: 19.32 AV: 1 NL: 3.70E3

T: ITMS + c NSI d Full ms2 820.72@cid35.00 [215.00-2000.00]

+3, 820.0306

2-6-0-0-0-1

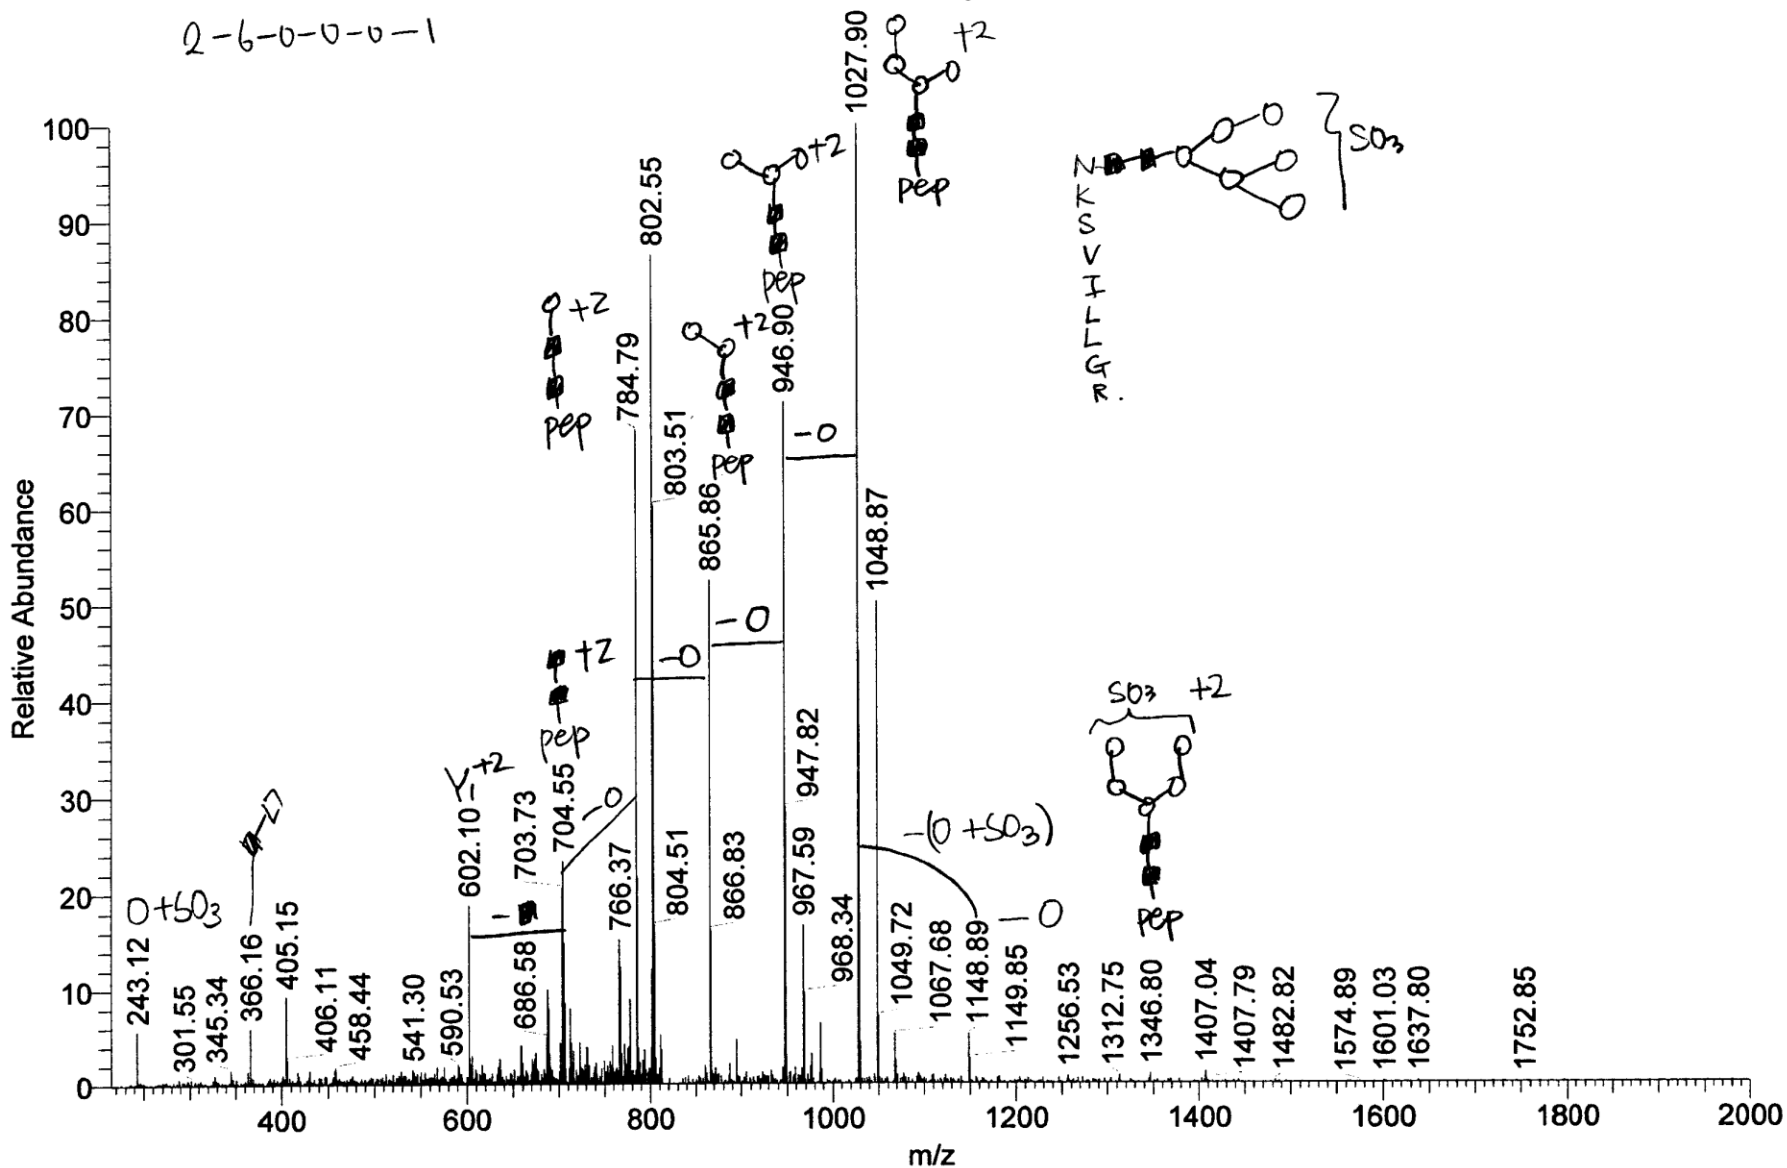

# HexNAc3Hex4NeuAc1

6/30/2017 12:24:11 PM

PSA\_2ug\_5B\_063012\_01 #1065 RT: 19.83 AV: 1 NL: 1.73E4

T: ITMS + c NSI d Full ms2 850.40@cid35.00 [220.00-2000.00]

+7. 850.0665 · 2547.0565

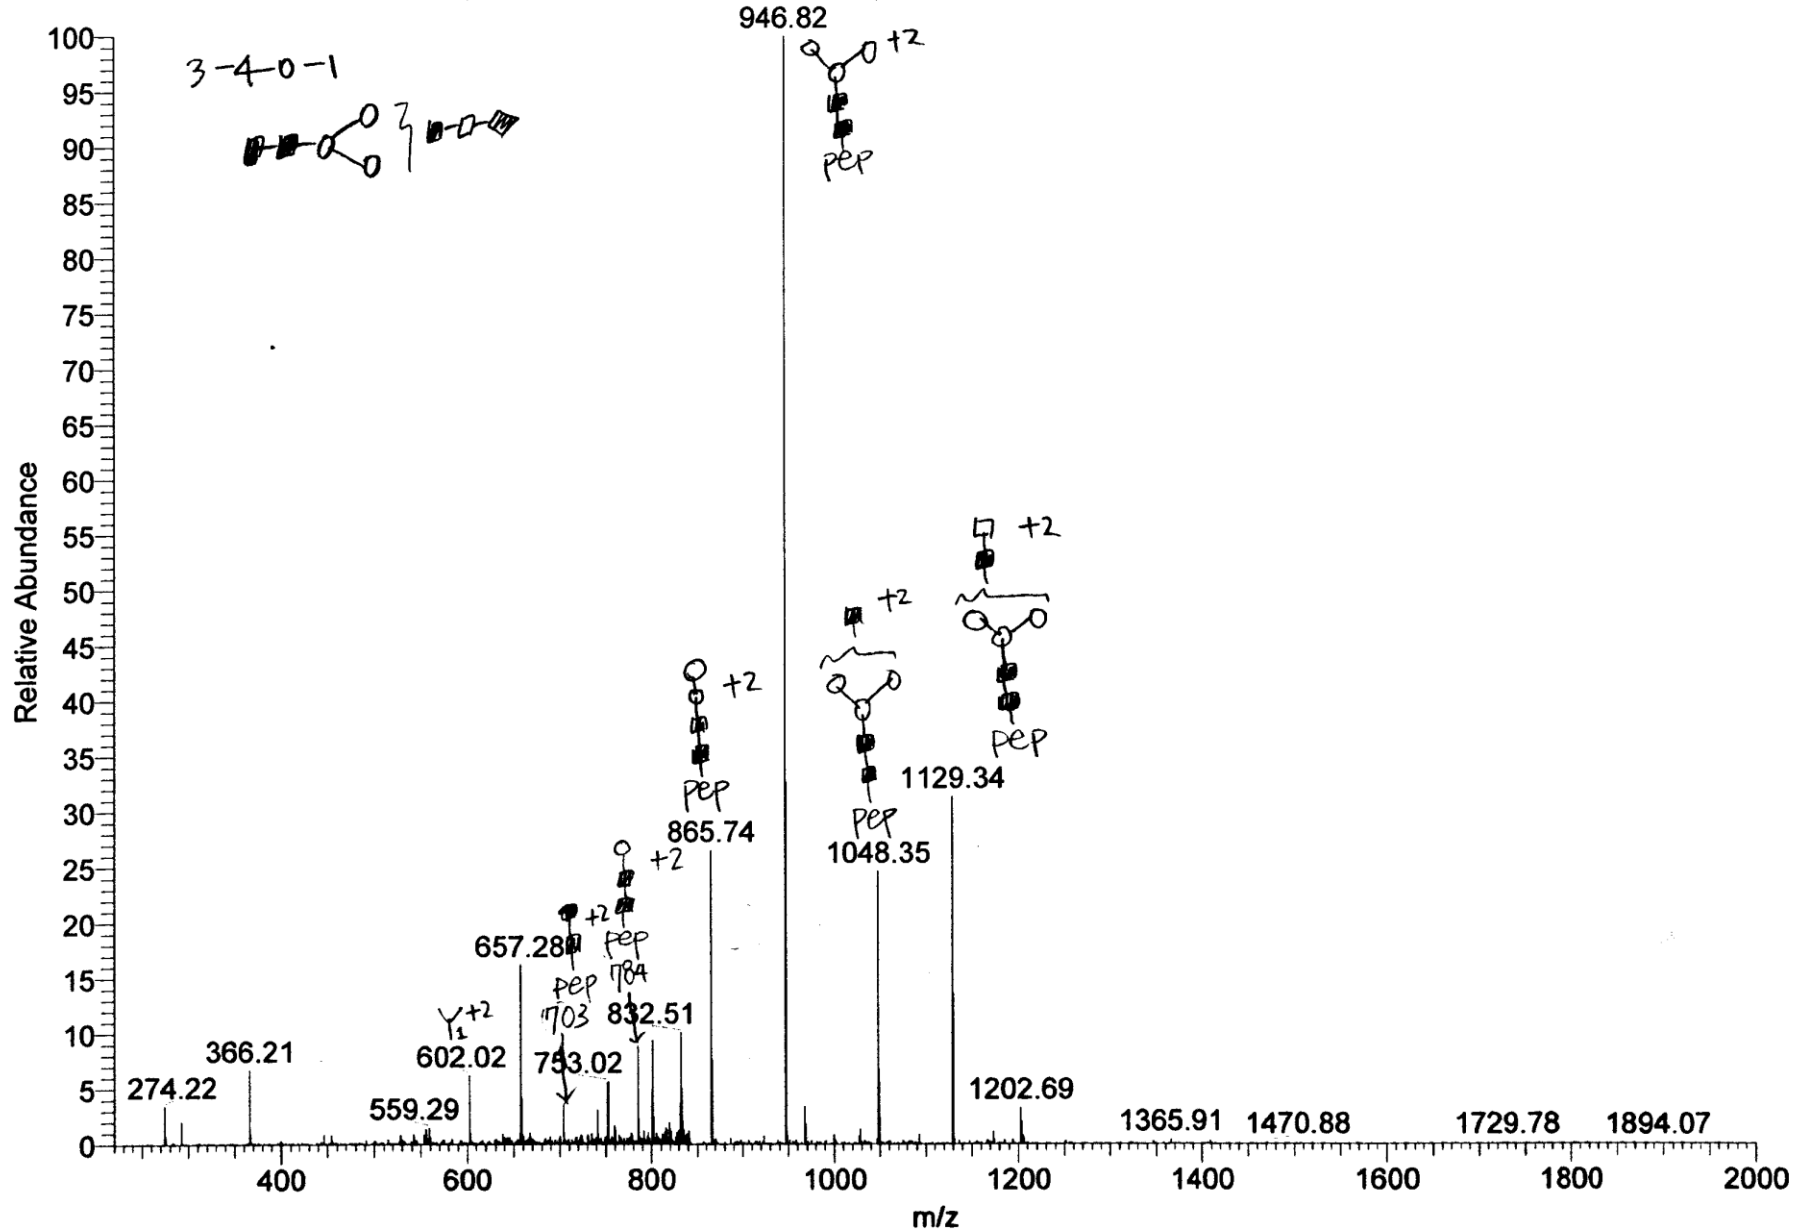

# HexNAc3Hex4dHex1NeuAc1

6/30/2017 12:24:11 PM

PSA\_2ug\_5B\_063012\_01 #1023 RT: 19.62 AV: 1 NL: 4.74E5

T: ITMS + c NSI d Full ms2 899.09@cid35.00 [235.00-2000.00] →, 898.1535, 2693.2370

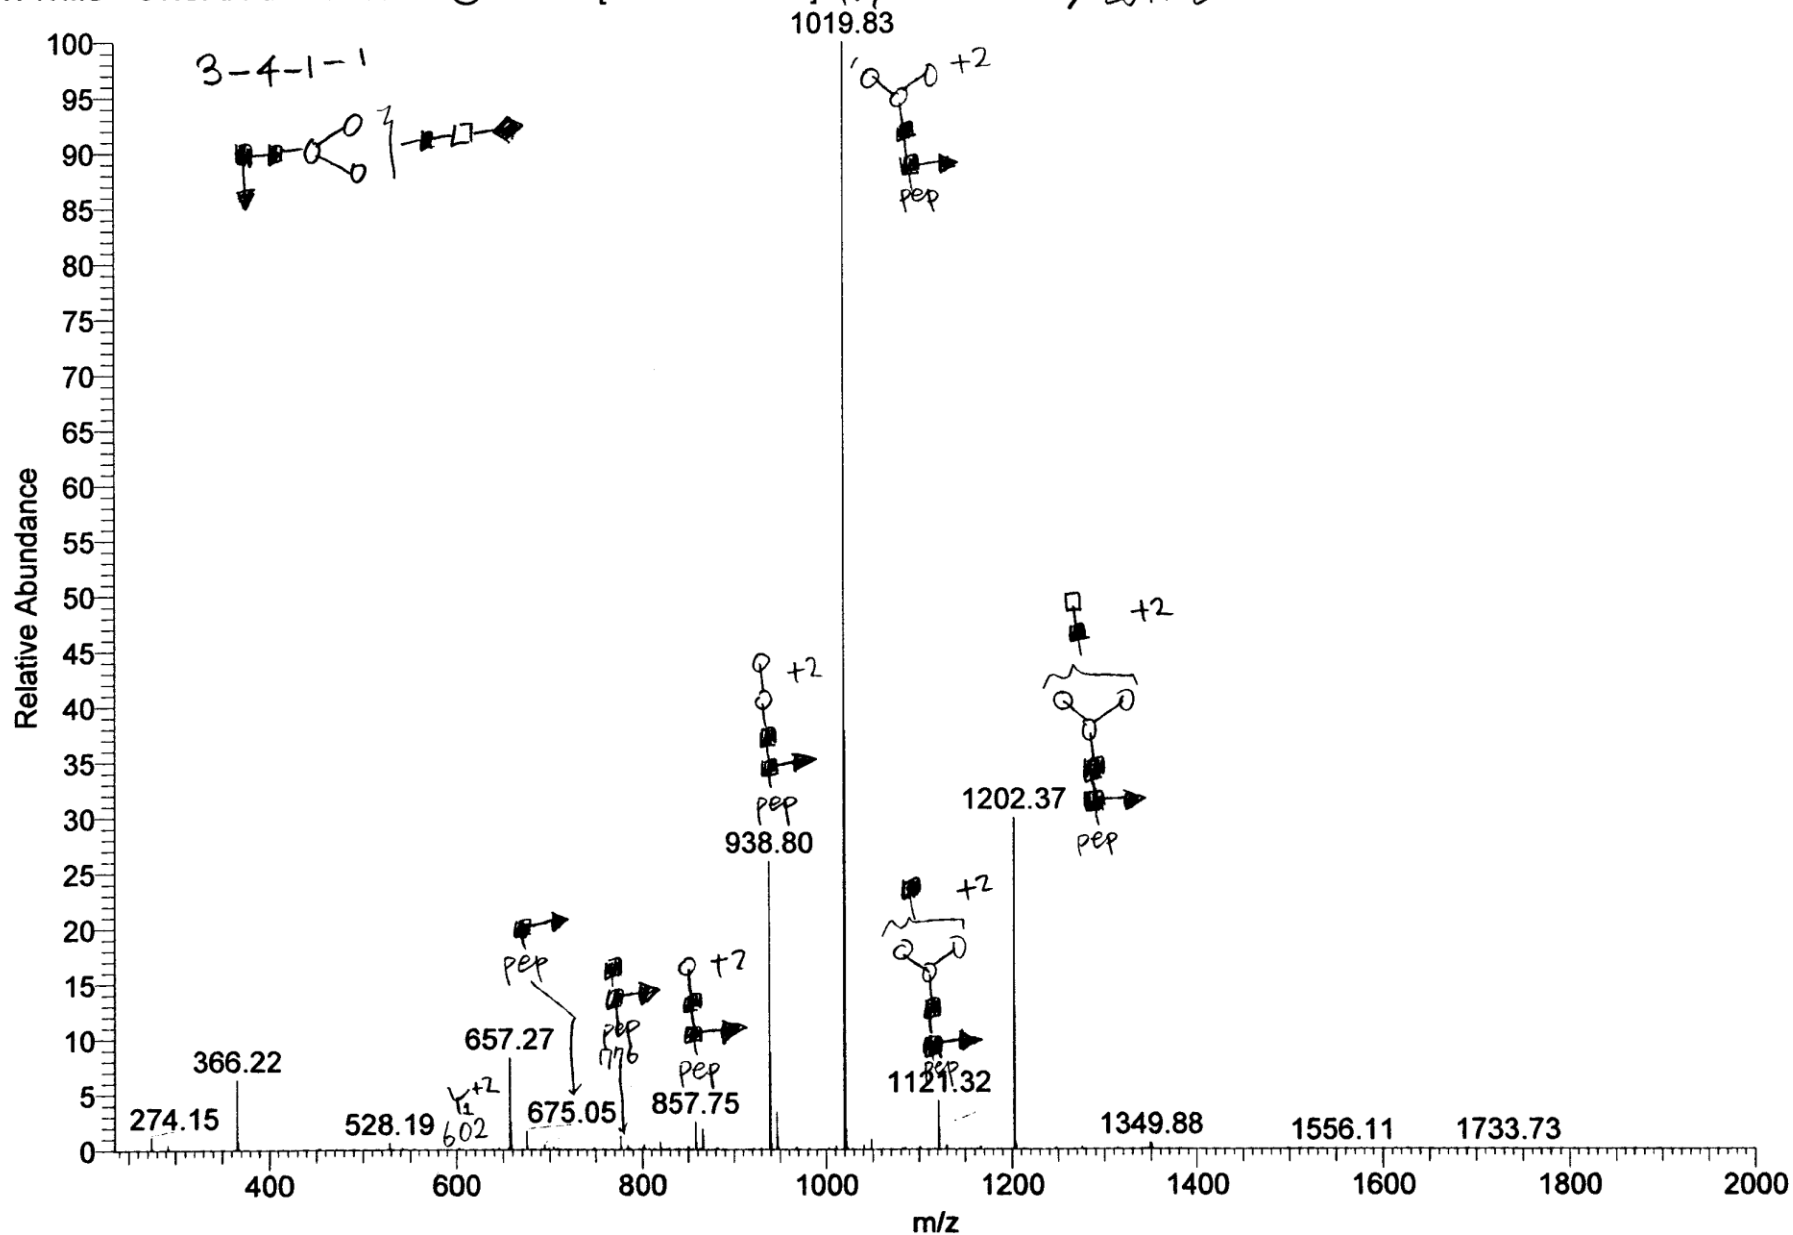

# HexNAc3Hex6NeuAc1

6/30/2017 12:24:11 PM

PSA\_2ug\_5B\_063012\_01 #957 RT: 19.28 AV: 1 NL: 3.39E5  
T: ITMS + c NSI d Full ms2 958.44@cid35.00 [250.00-2000.00]

1108.87 1291.44

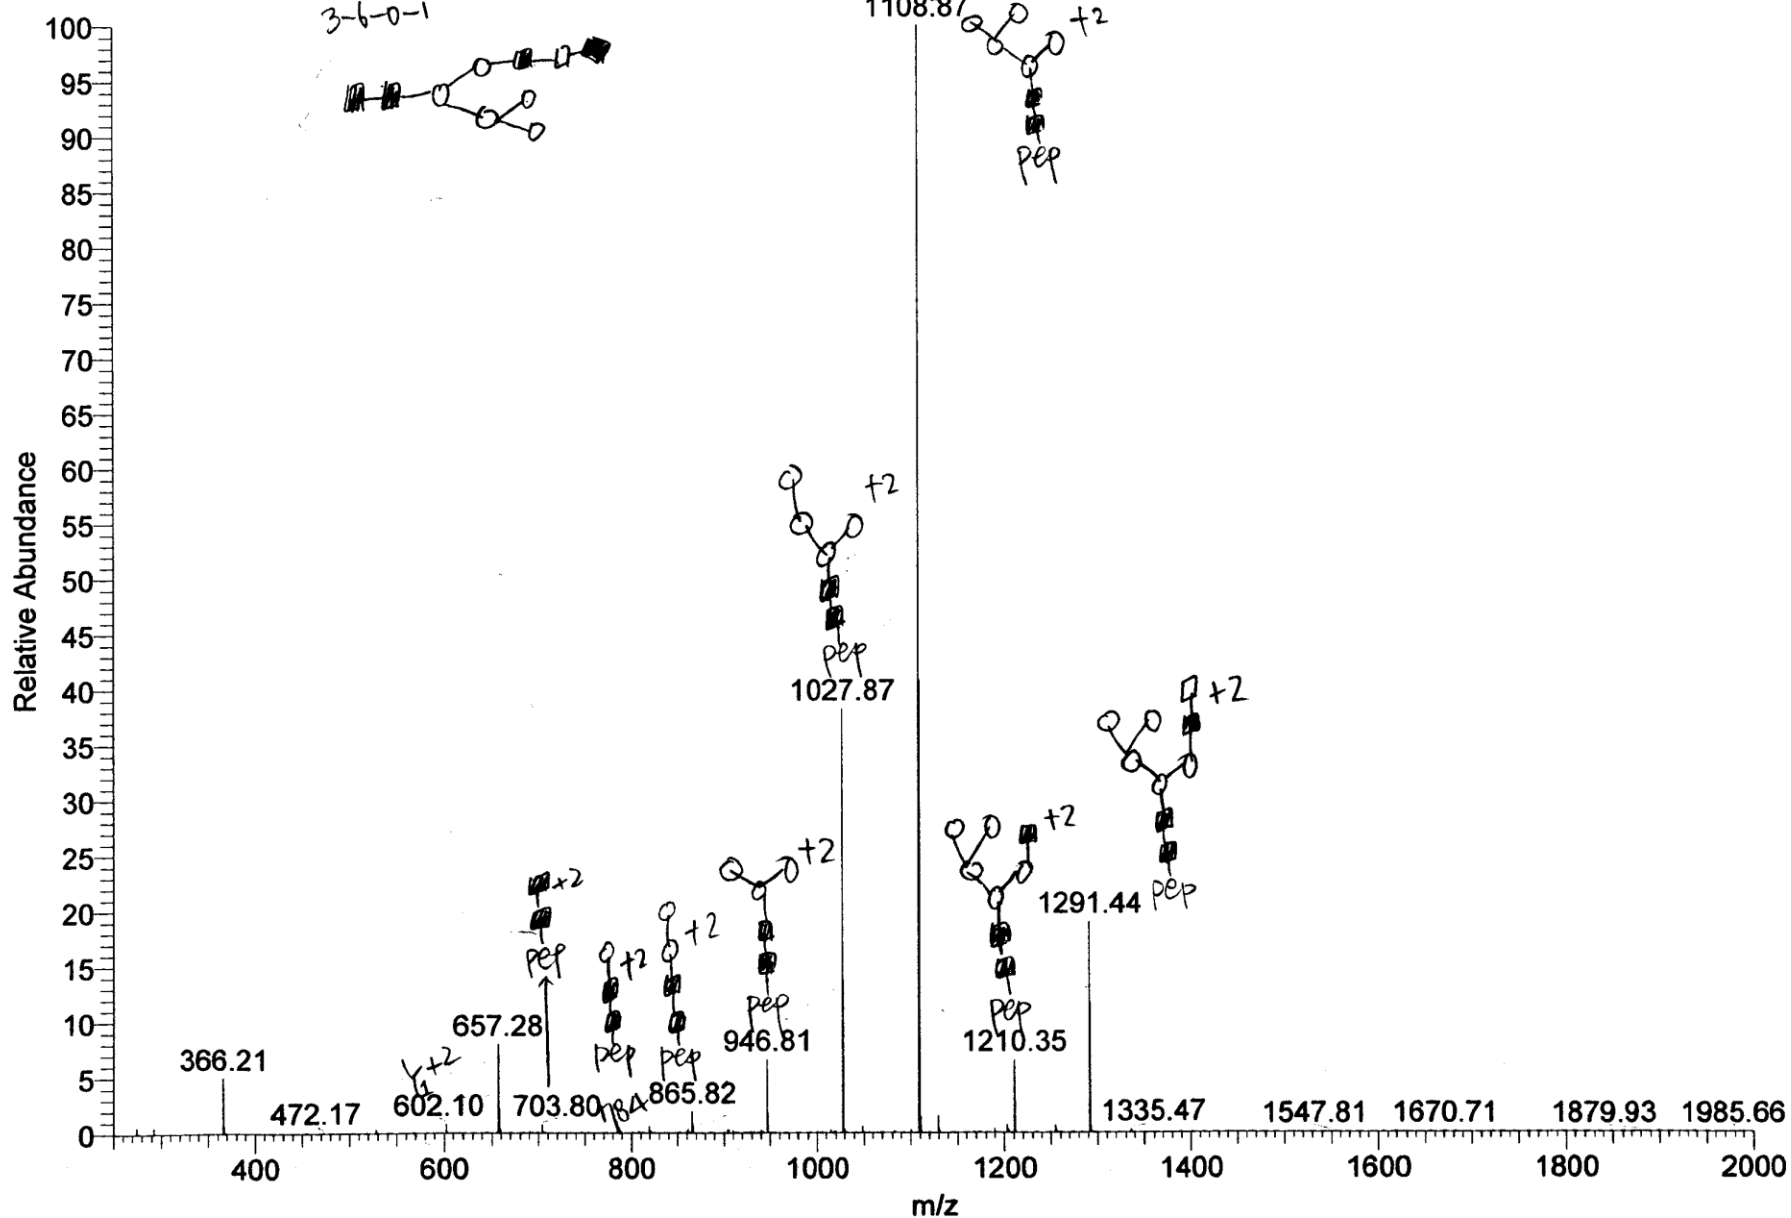

# HexNAc3Hex7NeuAc1

7/13/2017 10:35:40 AM

PSAH\_300ng\_5B\_masslists\_071312\_01 #646 RT: 18.70 AV: 1 NL: 1.29E3

T: ITMS + c NSI d Full ms2 1013.26@cid35.00 [265.00-2000.00]

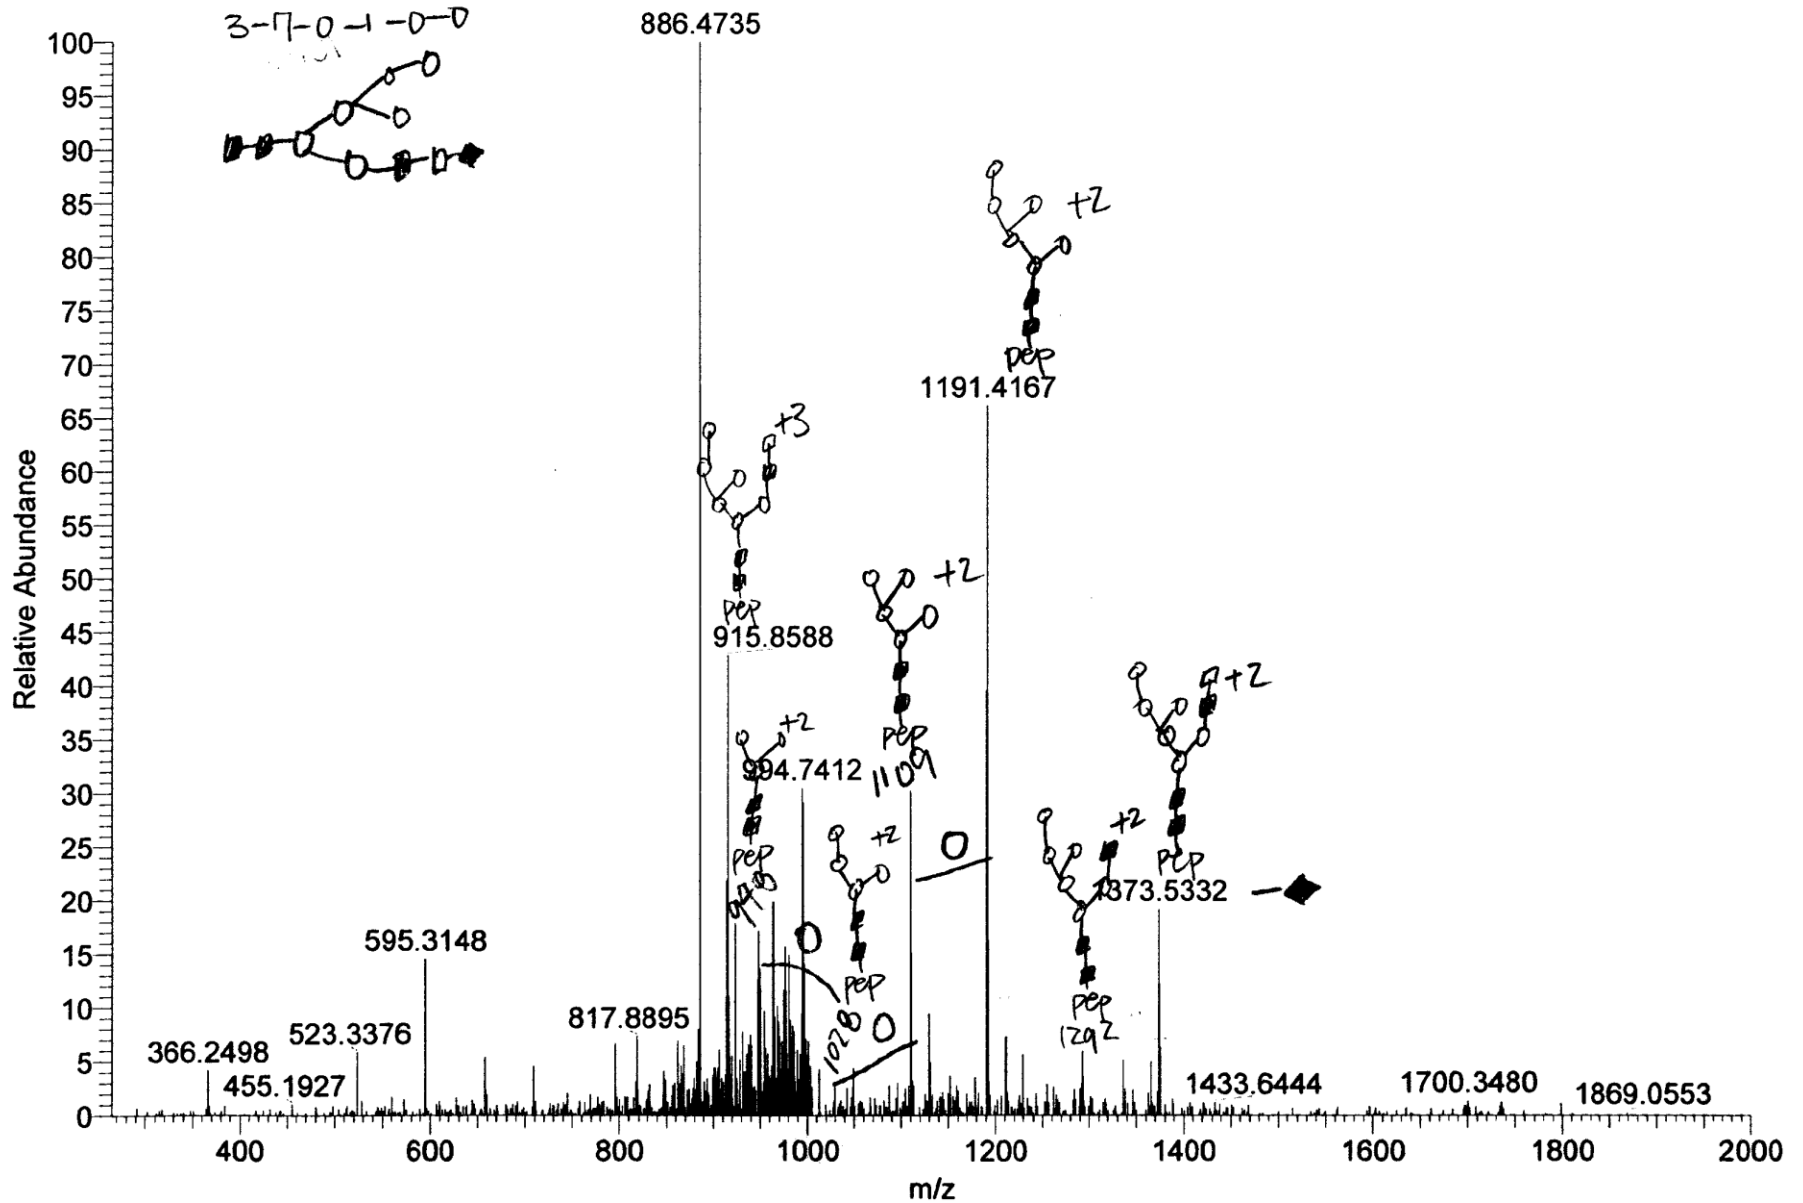



# HexNAc4Hex3dHex1

7/13/2012 11:35:40 AM

psah\_300ng\_5b\_masslists\_071312\_01 #562 RT: 17.72 AV: 1 NL: 9.96E3

T: ITMS + c NSI d Full ms2 815.39@cid35.00 [210.00-1645.00]

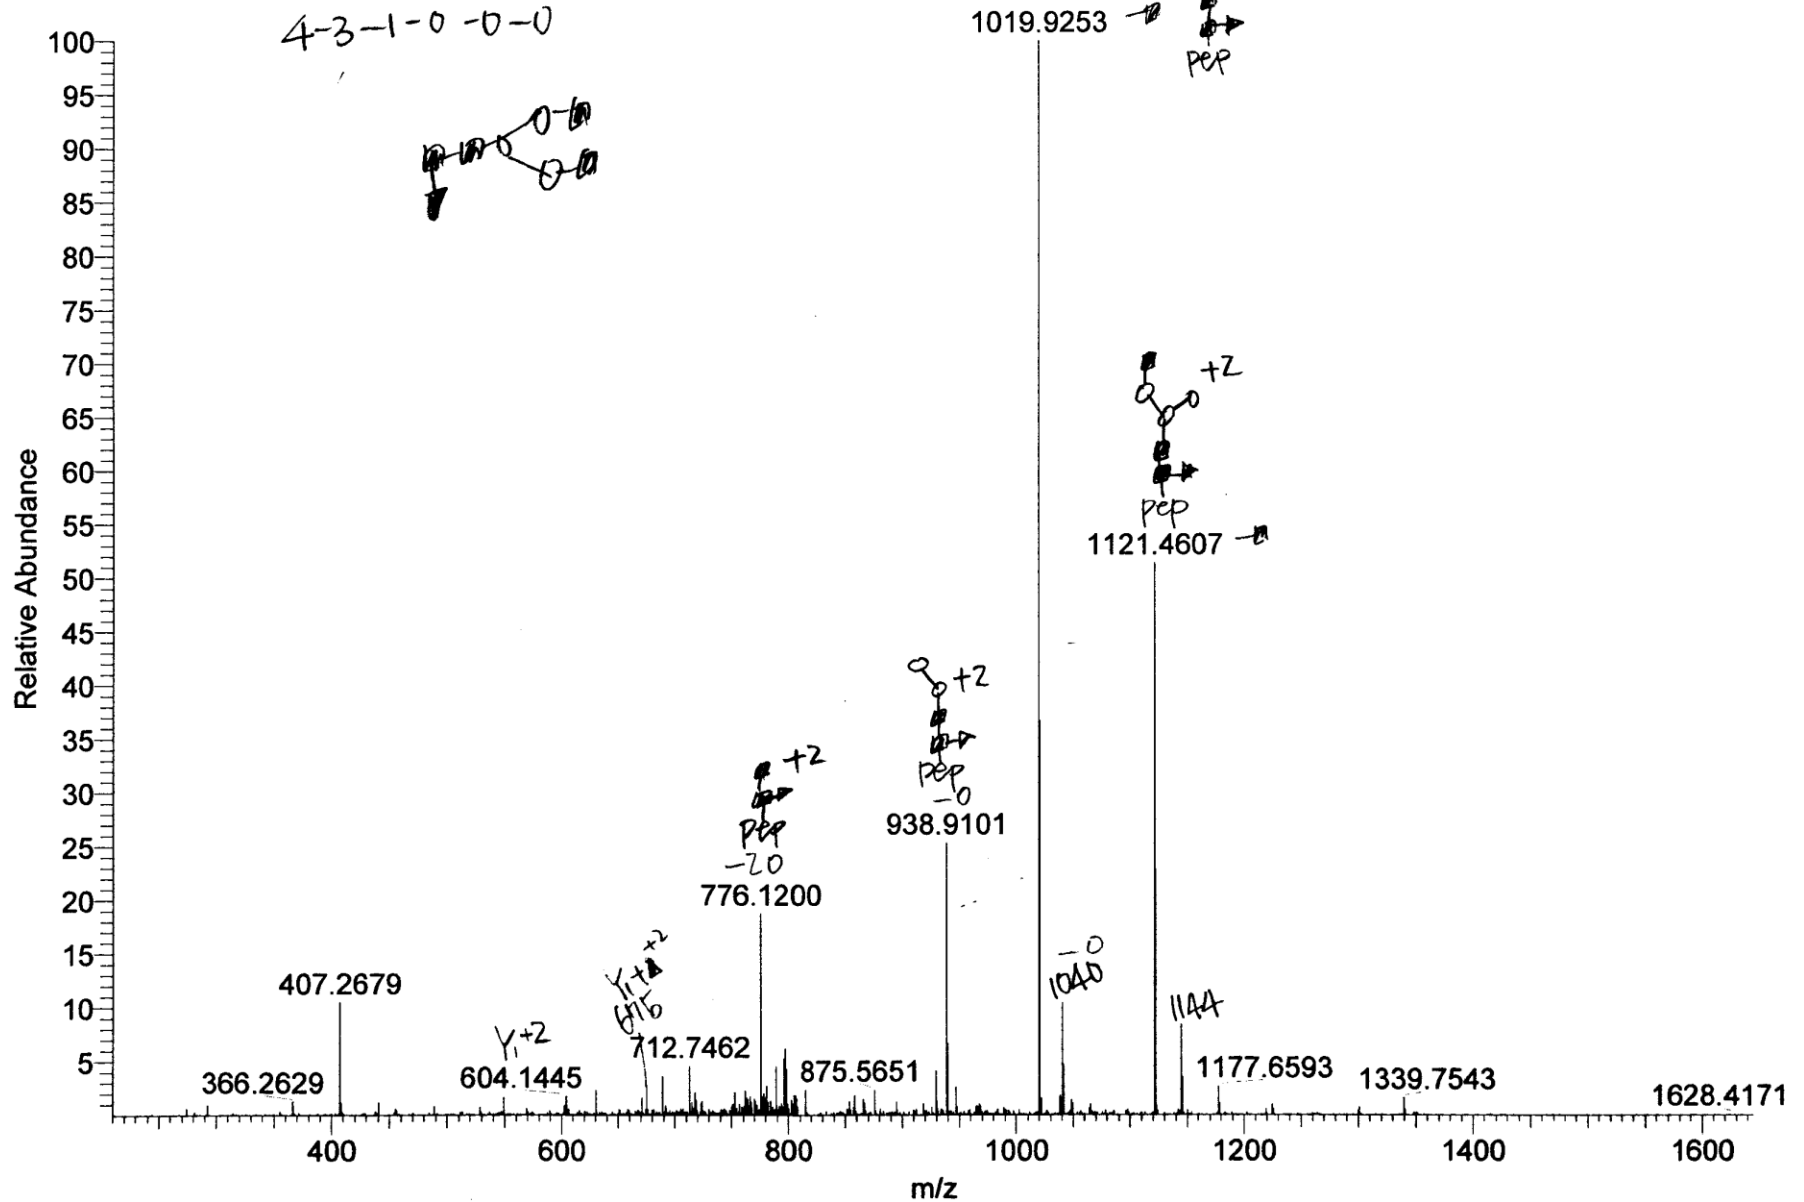



# HexNAc4Hex4

7/13/2017 10:35:40 AM

psah\_300ng\_5b\_masslists\_071312\_01 #556 RT: 17.65 AV: 1 NL: 5.31E4  
T: ITMS + c NSI d Full ms2 820.72@cid35.00 [215.00-2000.00]

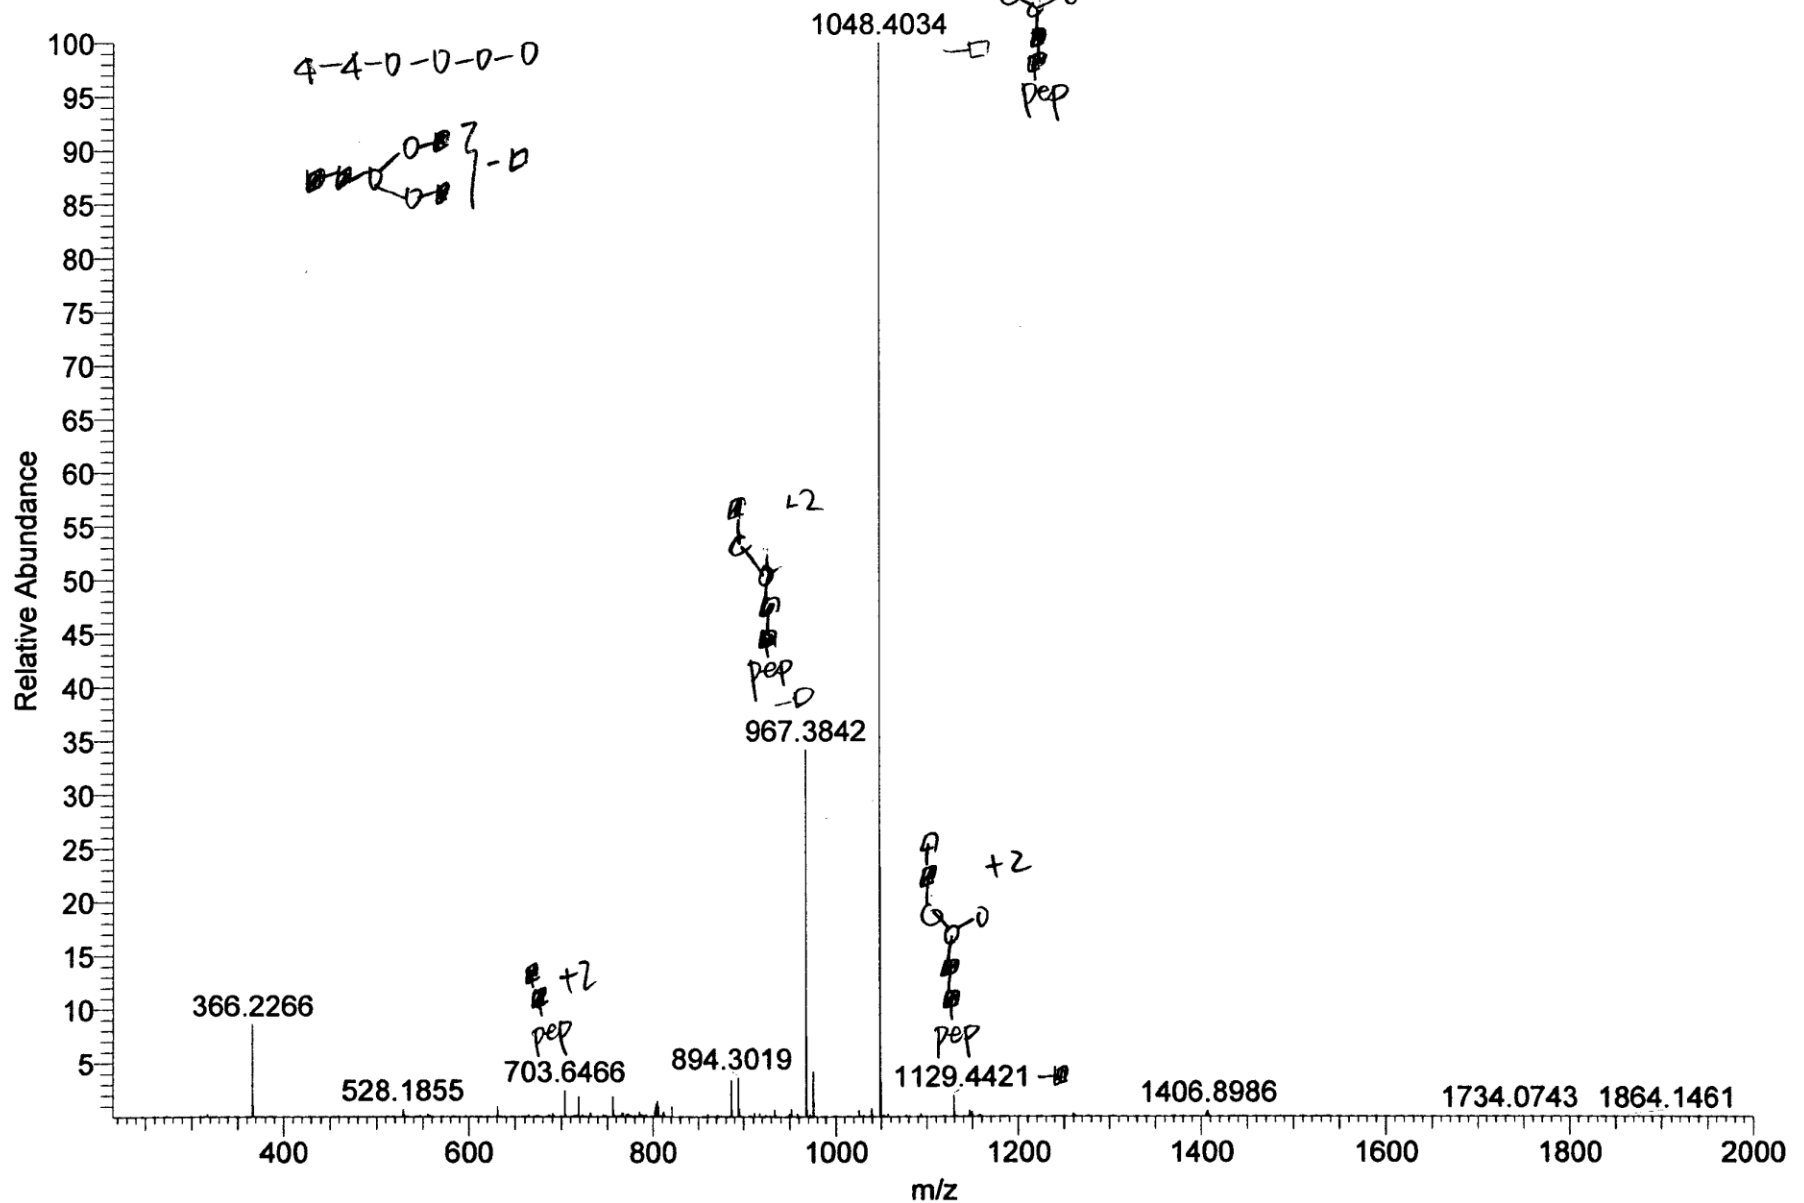

# HexNAc4Hex4NeuAc1

6/30/2017 12:24:11 PM

PSA\_2ug\_5B\_063012\_01 #1004 RT: 19.52 AV: 1 NL: 3.14E5

T: ITMS + c NSI d Full ms2 918.10@cid35.00 [240.00-2000.00]

13.917, 17631, 12750.268

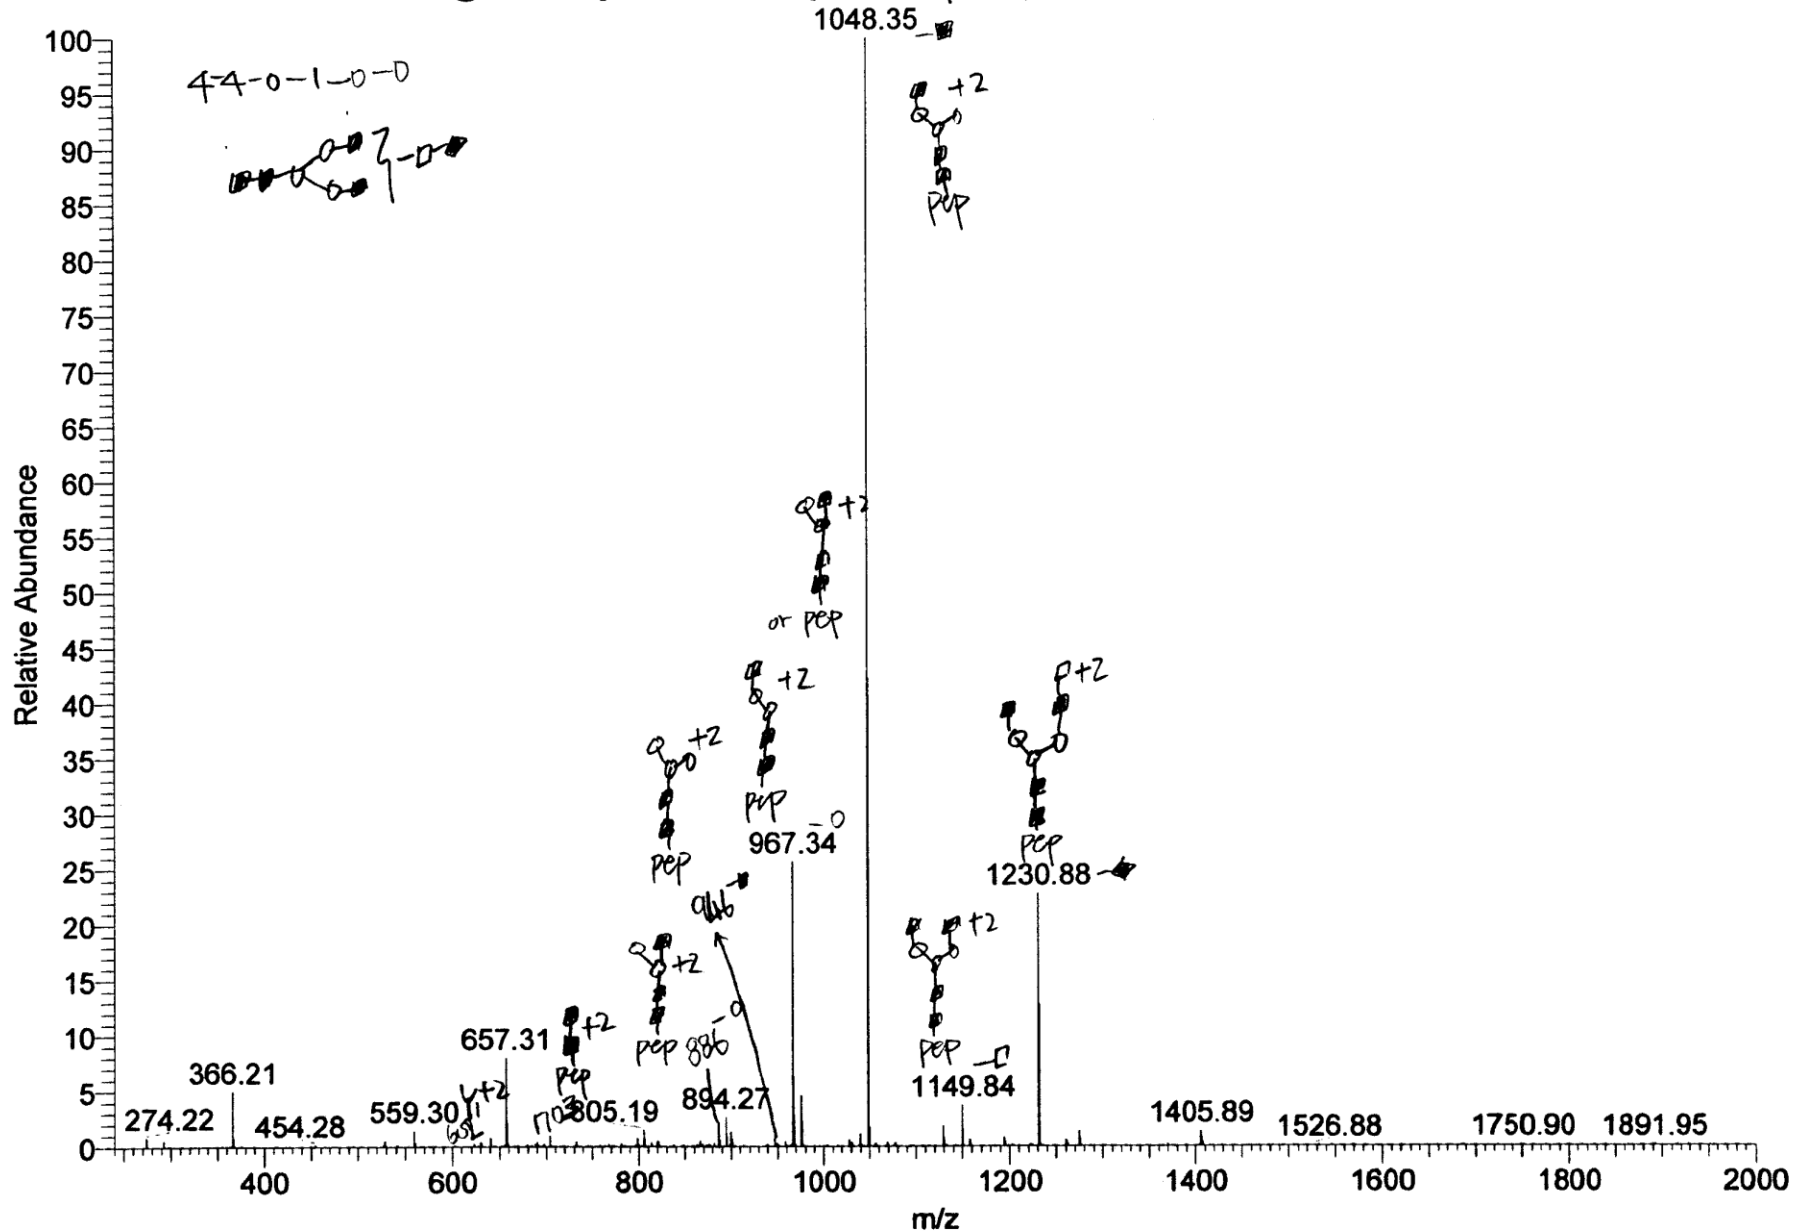

# HexNAc4Hex4dHex1

PSAH\_300ng\_5B\_masslists\_071312\_01 #552 RT: 17.63 AV: 1 NL: 5.19E4  
T: ITMS + c NSI d Full ms2 869.41@cid35.00 [225.00-2000.00]

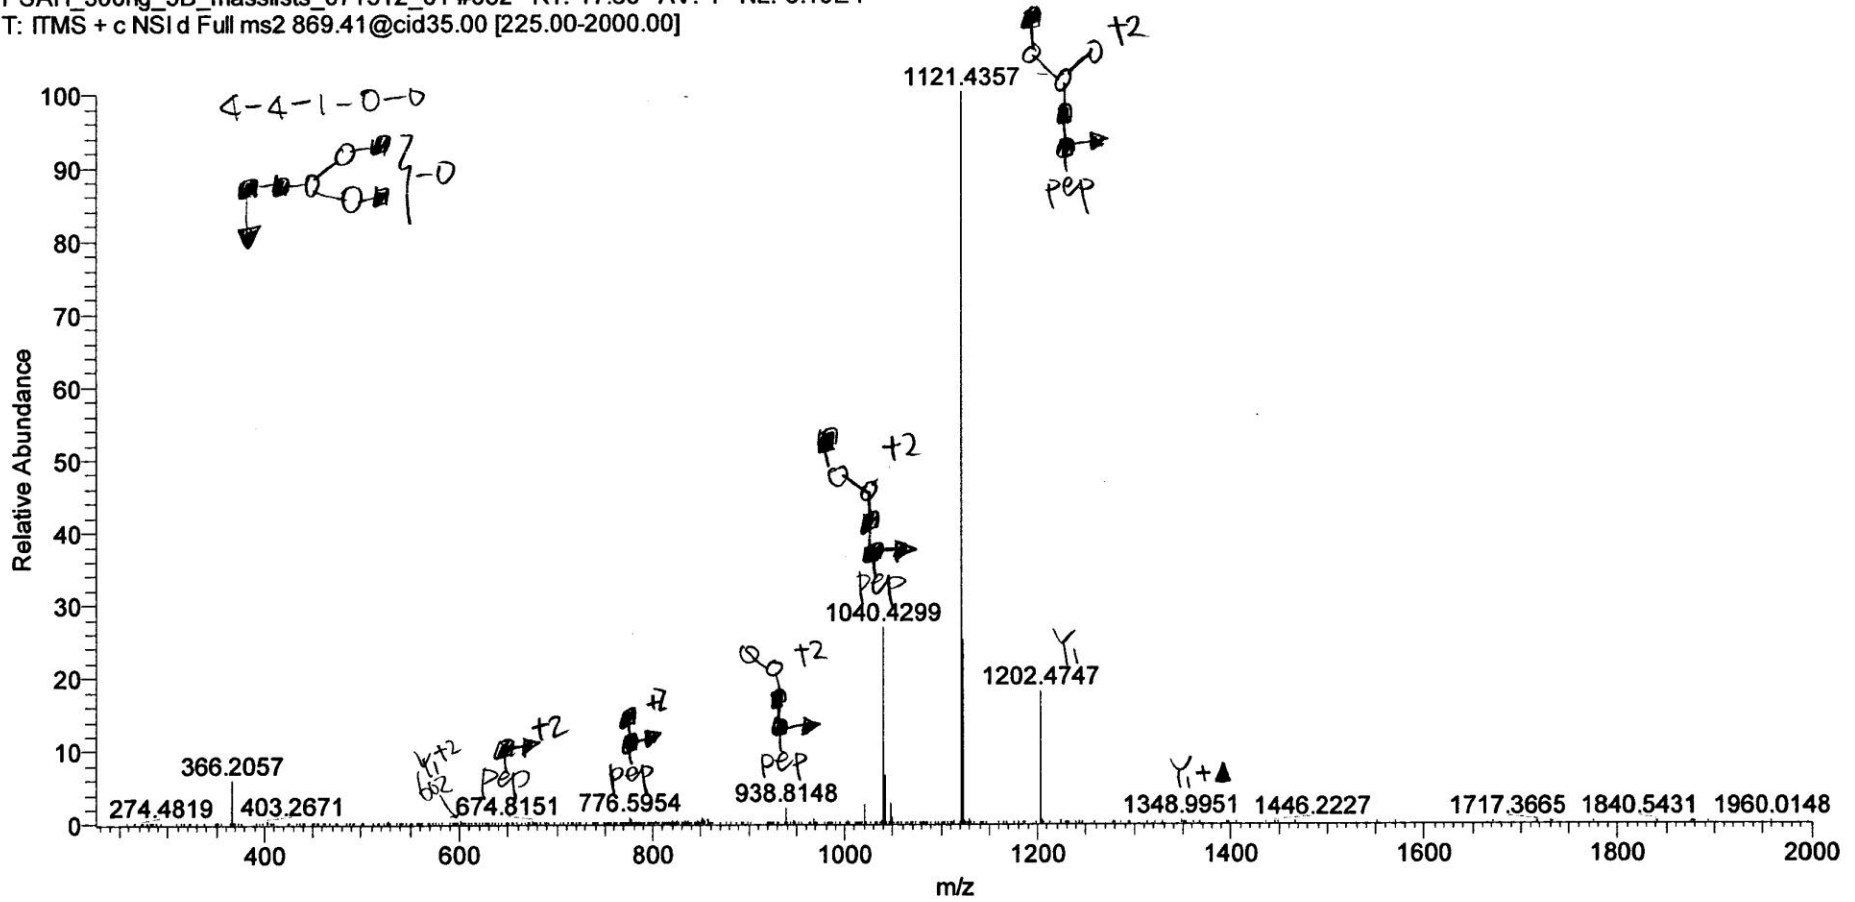



# HexNAc4Hex5

7/13/2017 1:35:40 AM

psah\_300ng\_5b\_masslists\_071312\_01 #539 RT: 17.49 AV: 1 NL: 1.95E4

T: ITMS + c NSI d Full ms2 874.04@cid35.00 [230.00-2000.00]

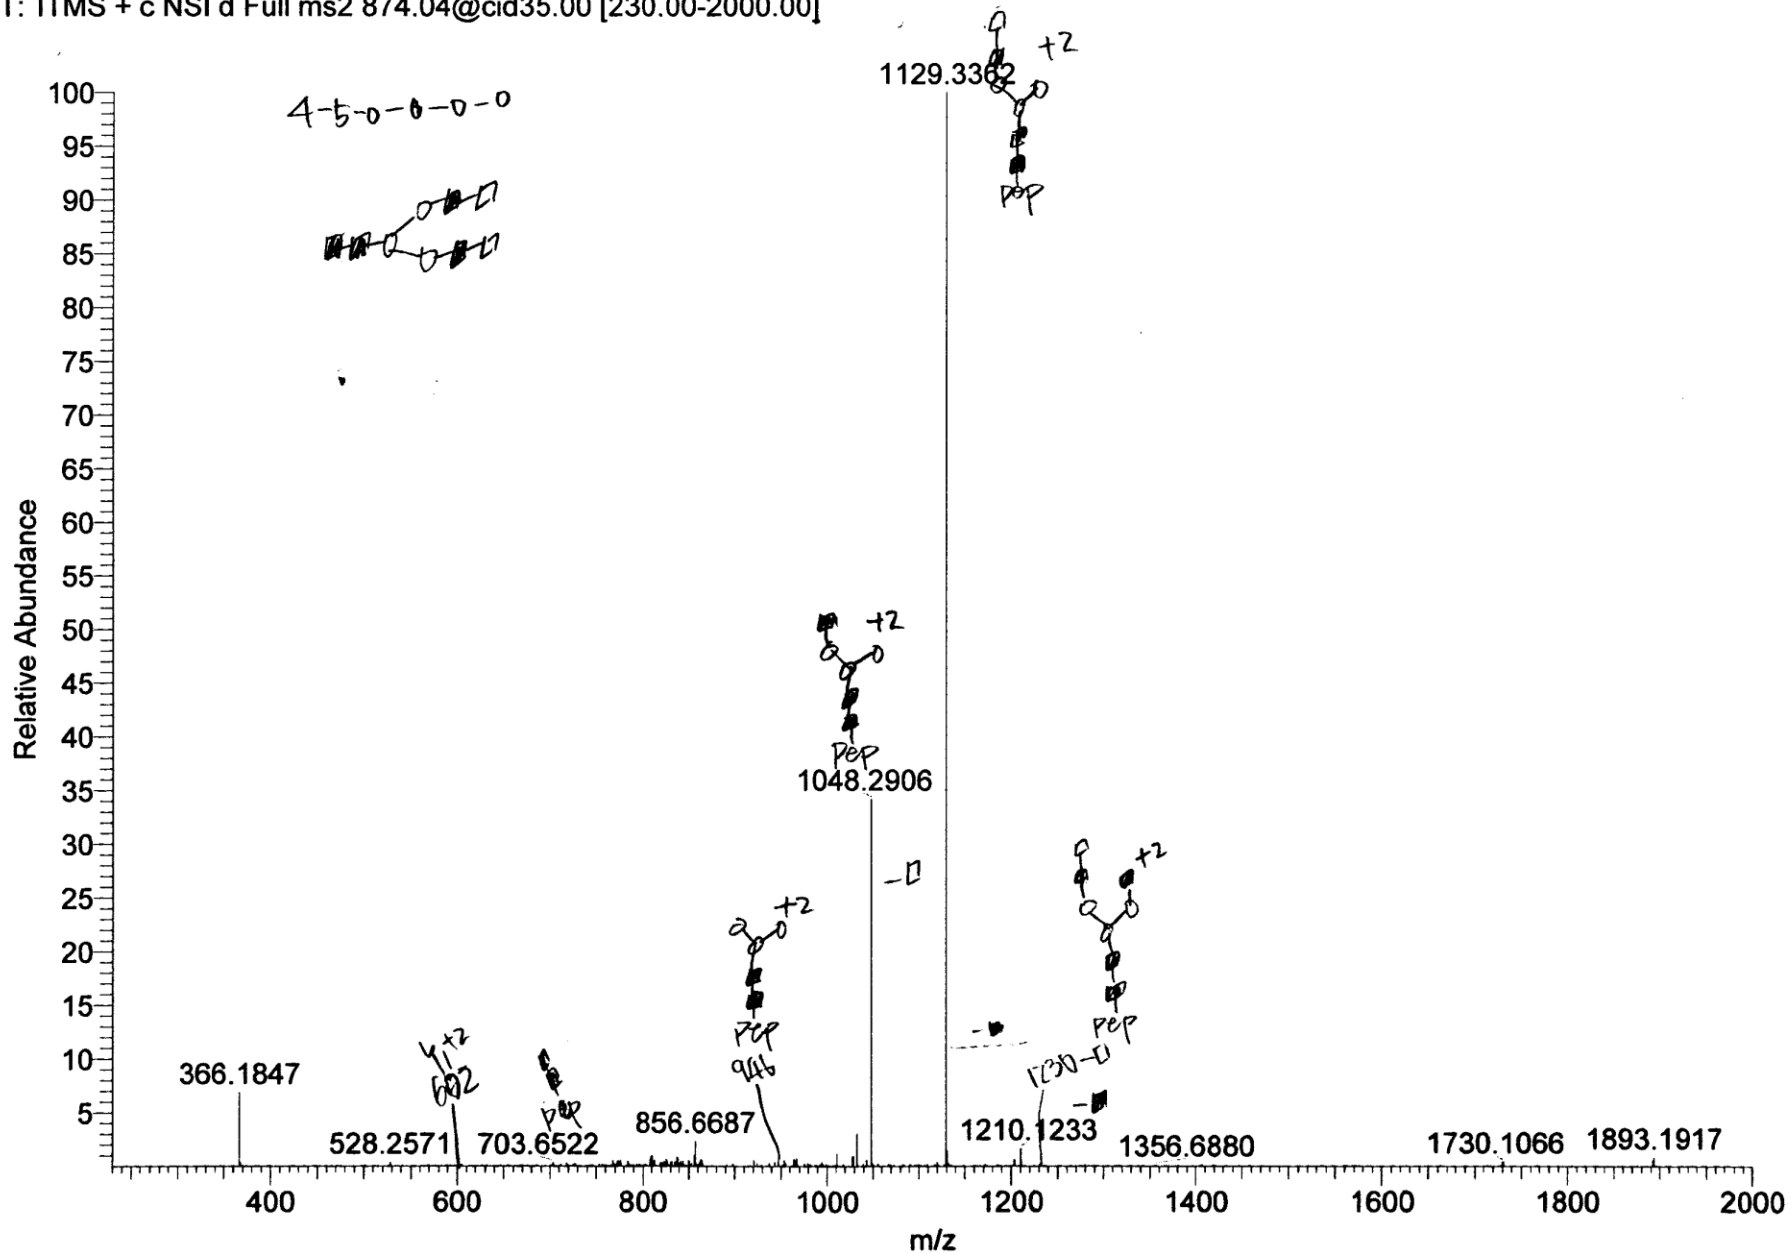

# HexNAc4Hex5dHex1

6/19/2012 8:16: M

PSAH\_200ng\_061912\_01 #391 RT: 14.50 AV: 1 NL: 3.23E5  
T: ITMS + c NSI d Full ms2 923.76@cid35.00 [240.00-2000.00]

+3, 923.429 2769.259 NKS VILLGR

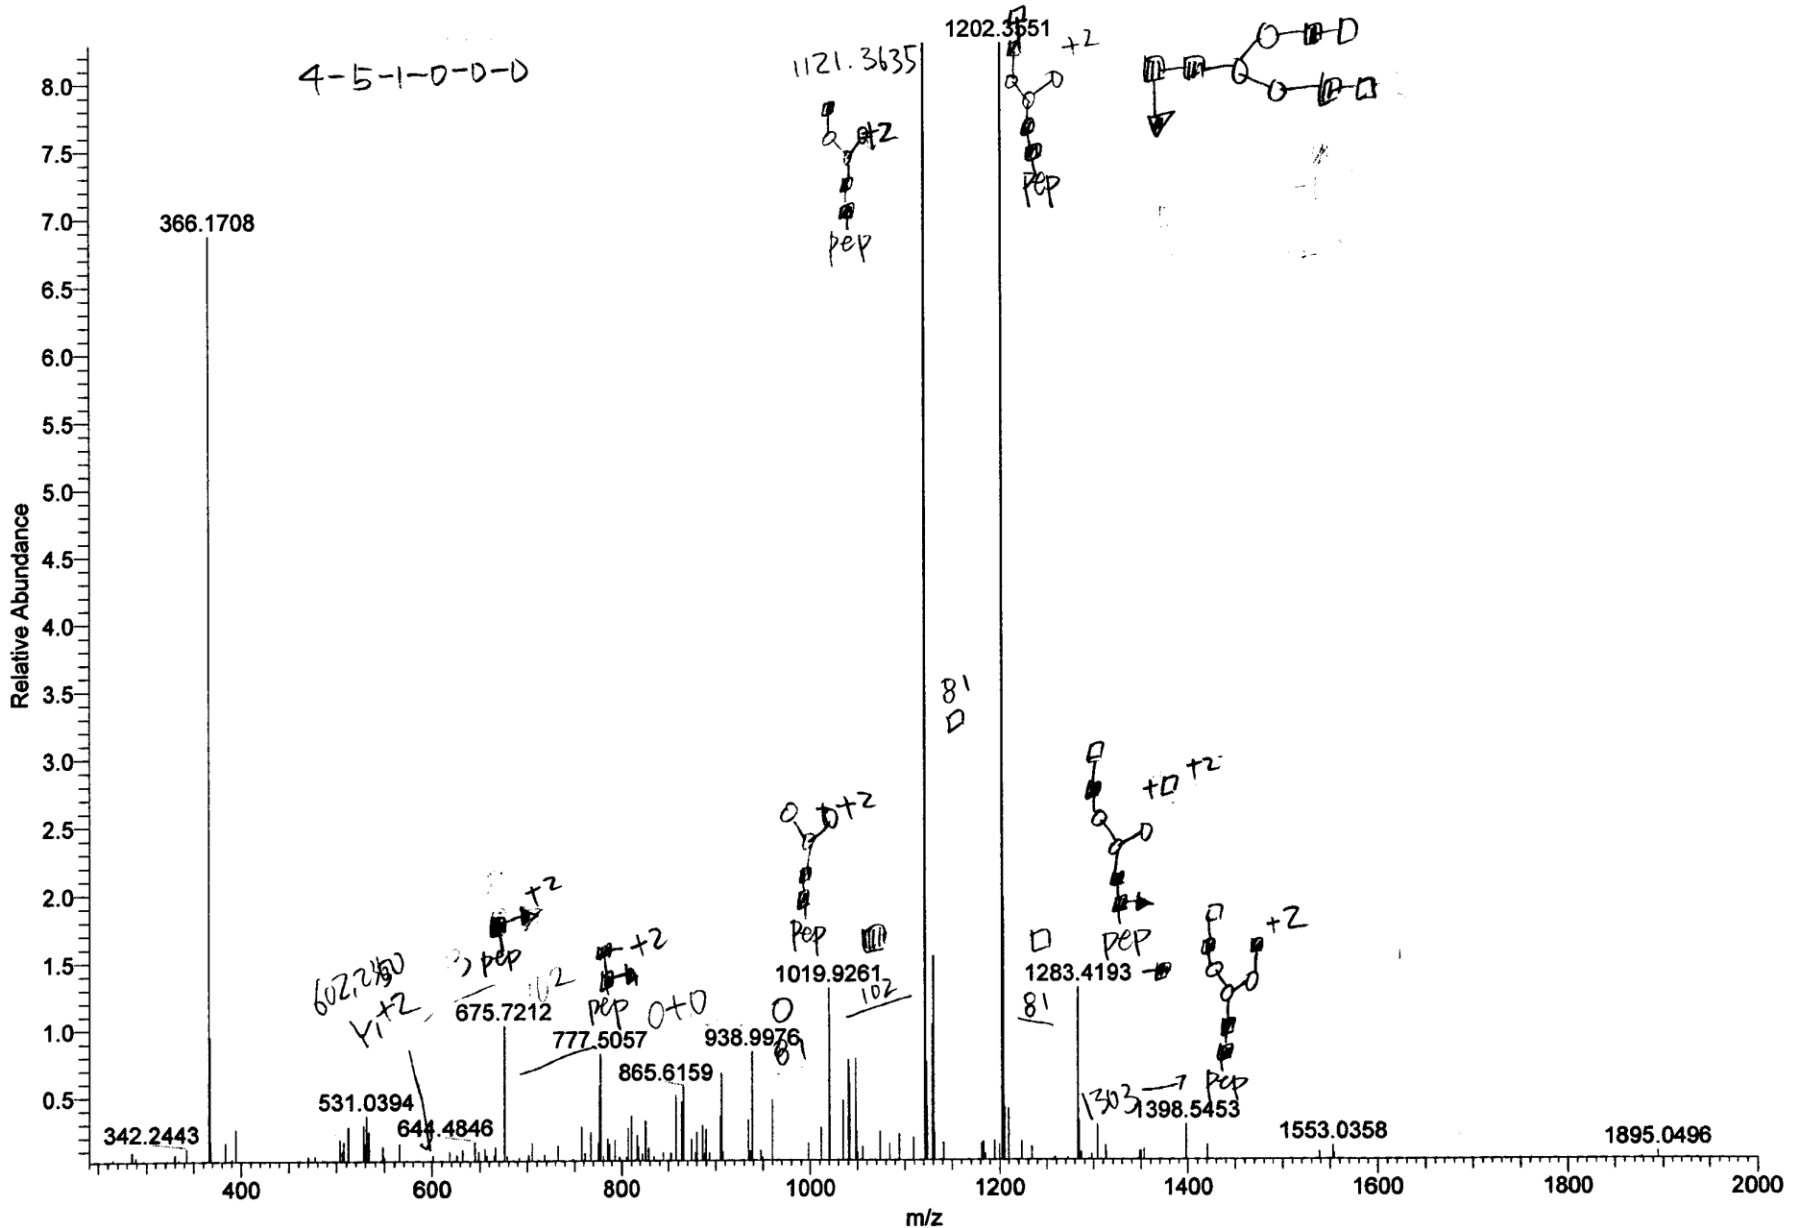



# HexNAc4Hex5NeuAc1

6/19/2012 8:16: M

PSAH\_200ng\_061912\_01 #731 RT: 15.65 AV: 1 NL: 1.44E5  
T: ITMS + c NSI d Full ms2 972.11@cid35.00 [255.00-2000.00]

+3, 991.7961, 2912.309

4-5-0-1-0-0

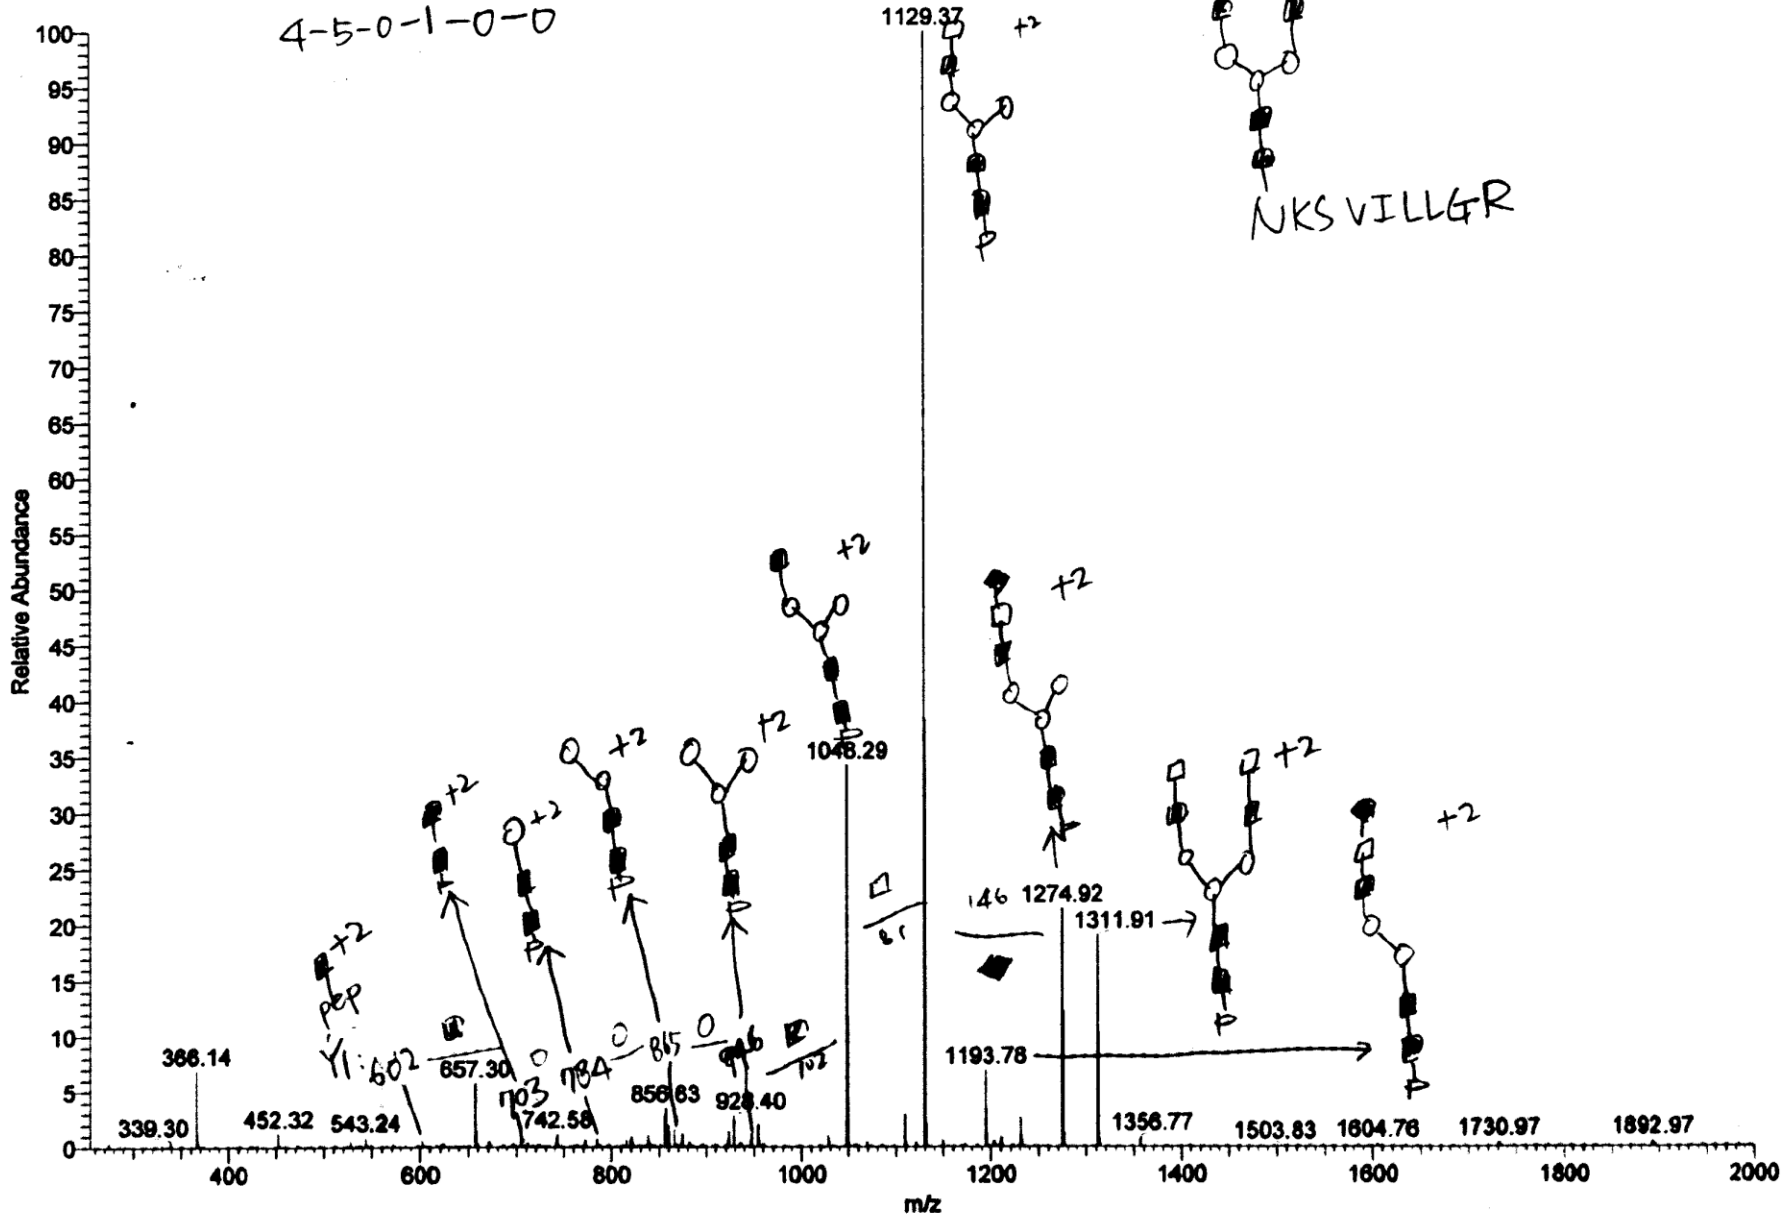

# HexNAc4Hex5NeuAc2

6/19/2012 8:16: M

PSAH 200ng\_061912\_01 #1394 RT: 17.83 AV: 1 NL: 4.11E4  
T: ITMS + c NSI d Full ms2 1069.14@cid35.00 [280.00-2000.00]

+3, 1069.804, 3203.39

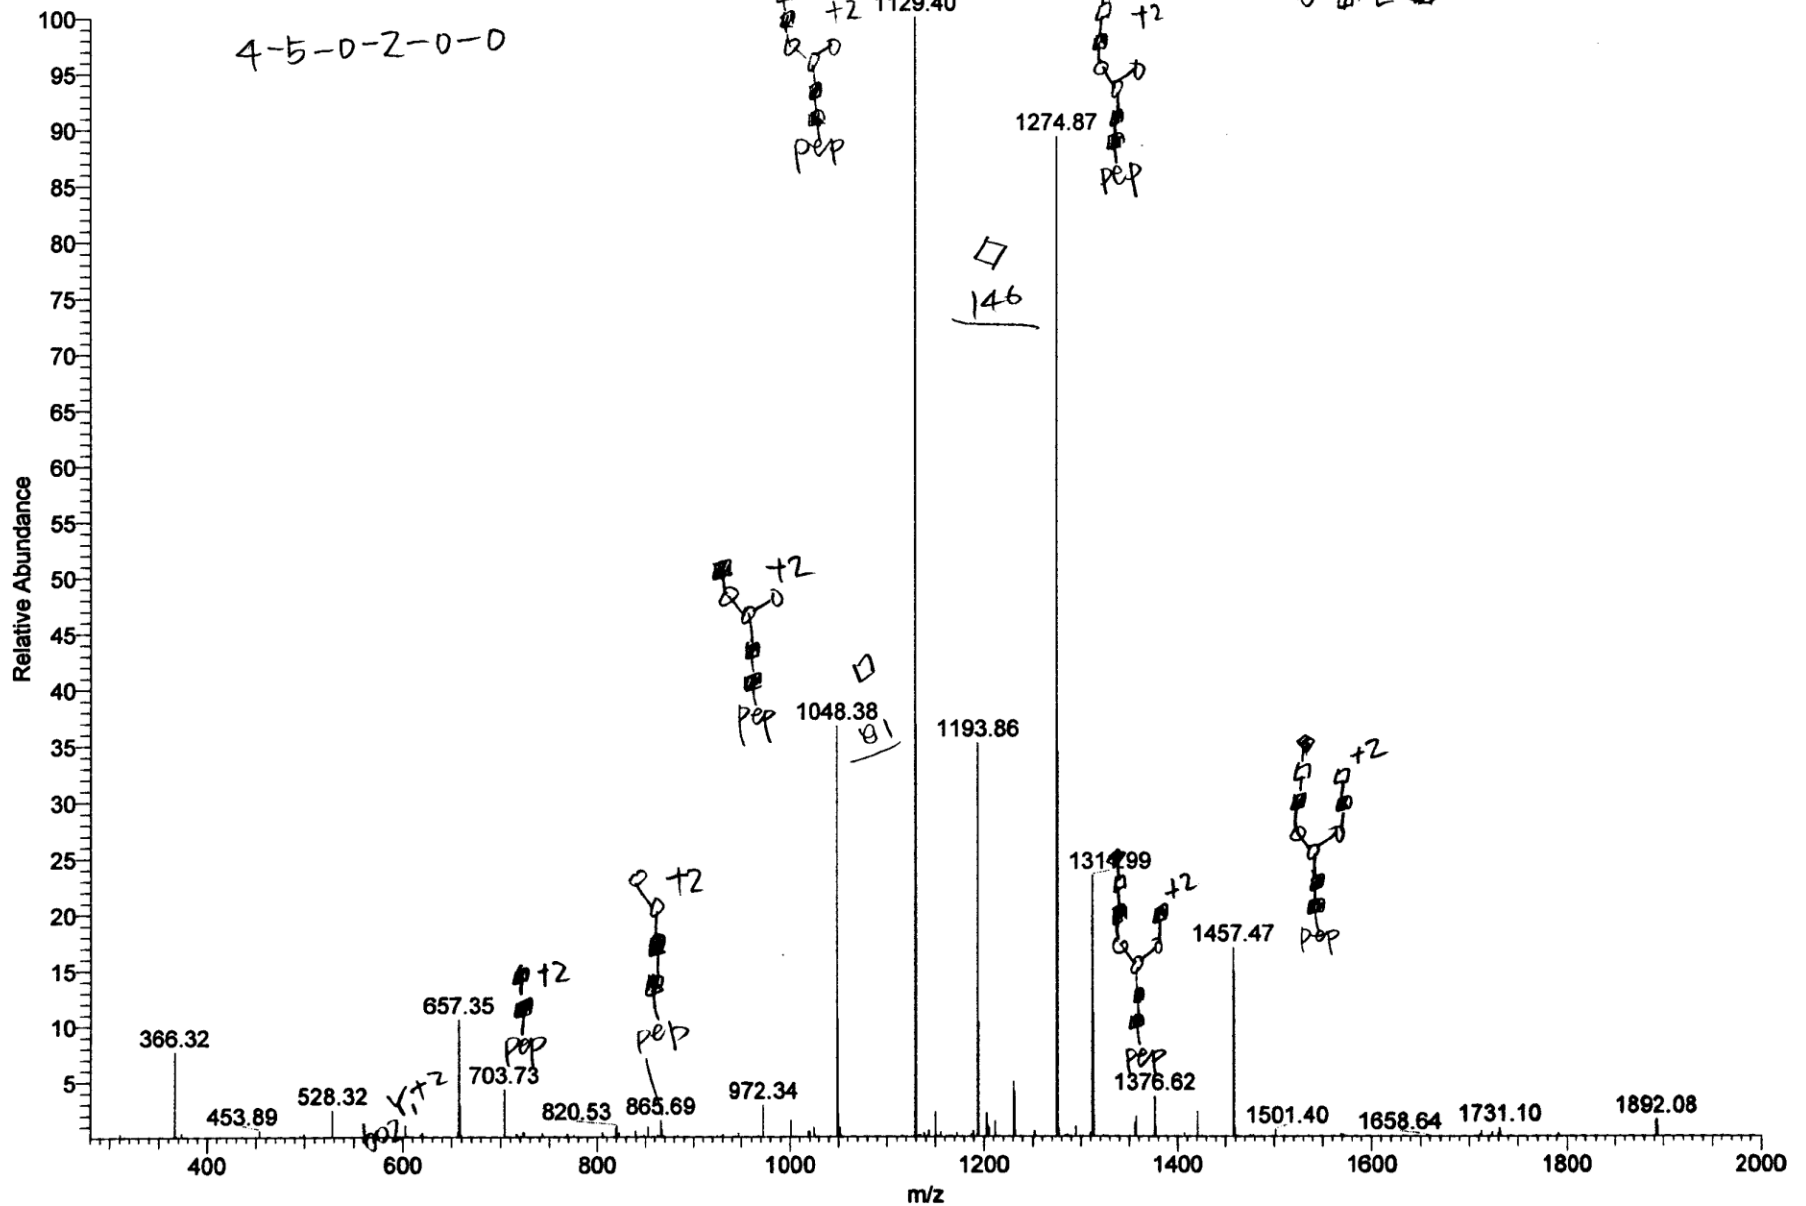

# HexNAc4Hex5dHex1NeuAc1

6/30/2017 12:24:11 PM

PSA\_2ug\_5B\_063012\_01 #974 RT: 19.37 AV: 1 NL: 1.95E5

T: ITMS + c NSI d Full ms2 1020.80@cid35.00 [270.00-2000.00]

+3, 1020.467, 3058.3775

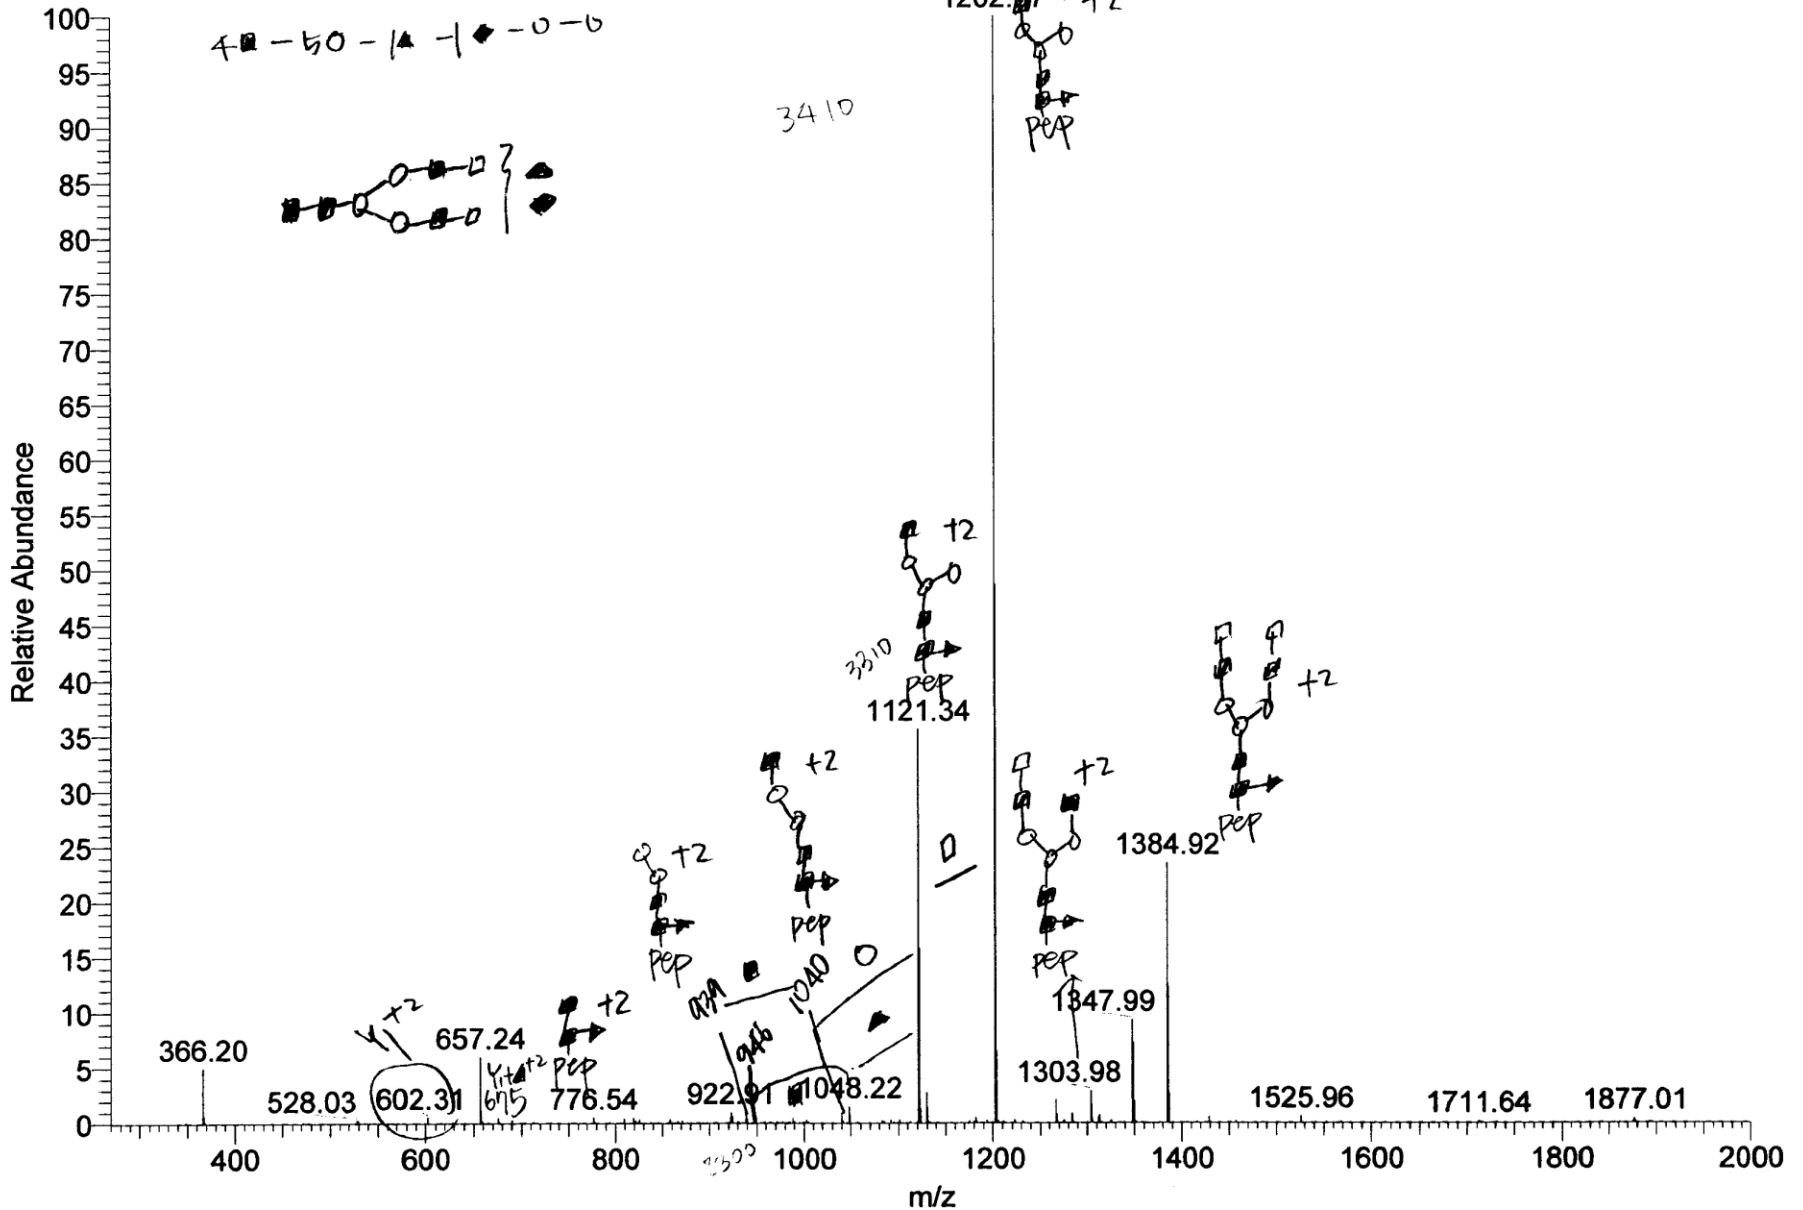

# HexNAc4Hex5dHex2NeuAc1

7/13/2017 10:35:40 AM

PSAH\_300ng\_5B\_masslists\_071312\_01 #693 RT: 19.12 AV: 1 NL: 7.32E3  
T: ITMS + c NSI d Full ms2 1069.15@cid35.00 [280.00-2000.00]

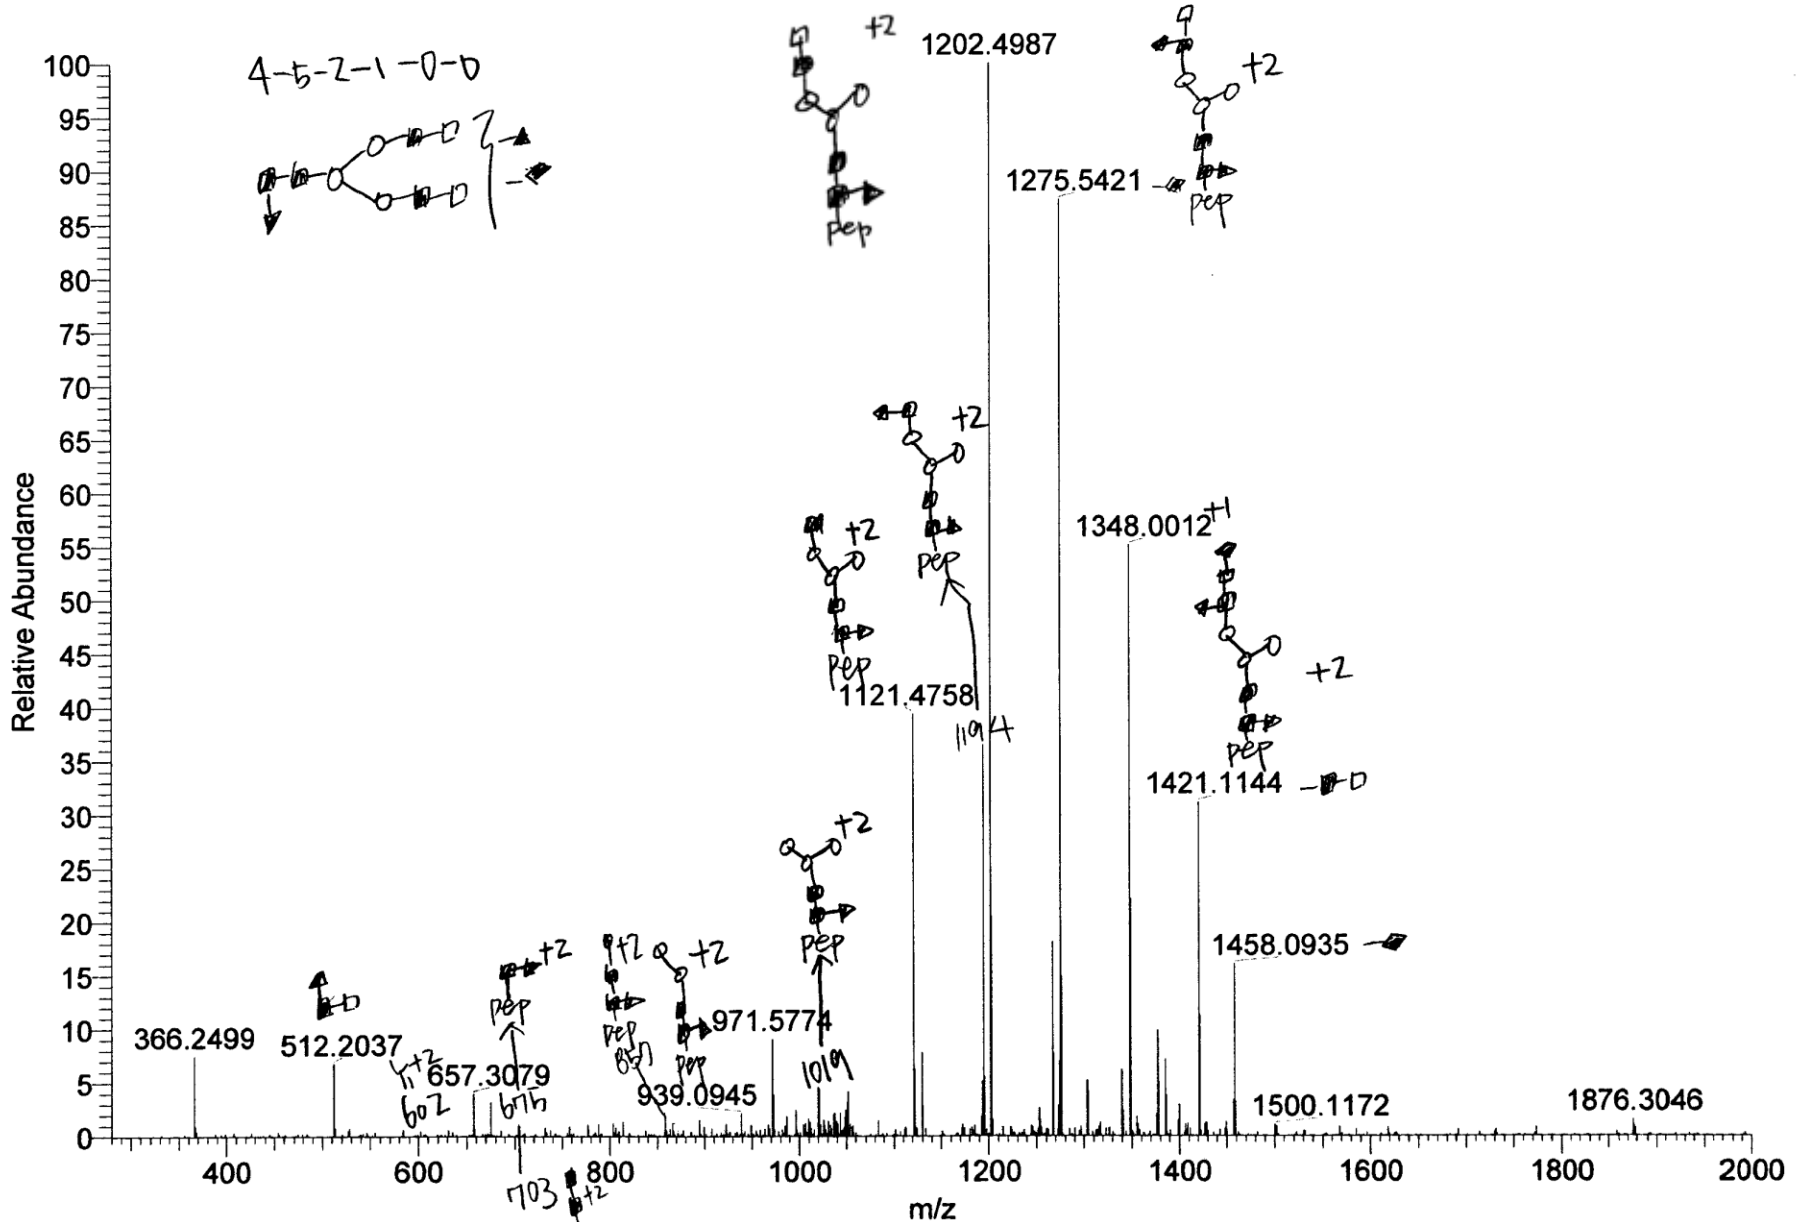

# HexNAc4Hex5dHex1NeuAc2

6/30/2017 12:24:11 PM

PSA\_2ug\_5B\_063012\_01#1473 RT: 22.05 AV: 1 NL: 3.09E4  
T: ITMS + c NSI d Full ms2 1117.83@cid35.00 [295.00-2000.00]

+3, 1117.496, 3349.4645

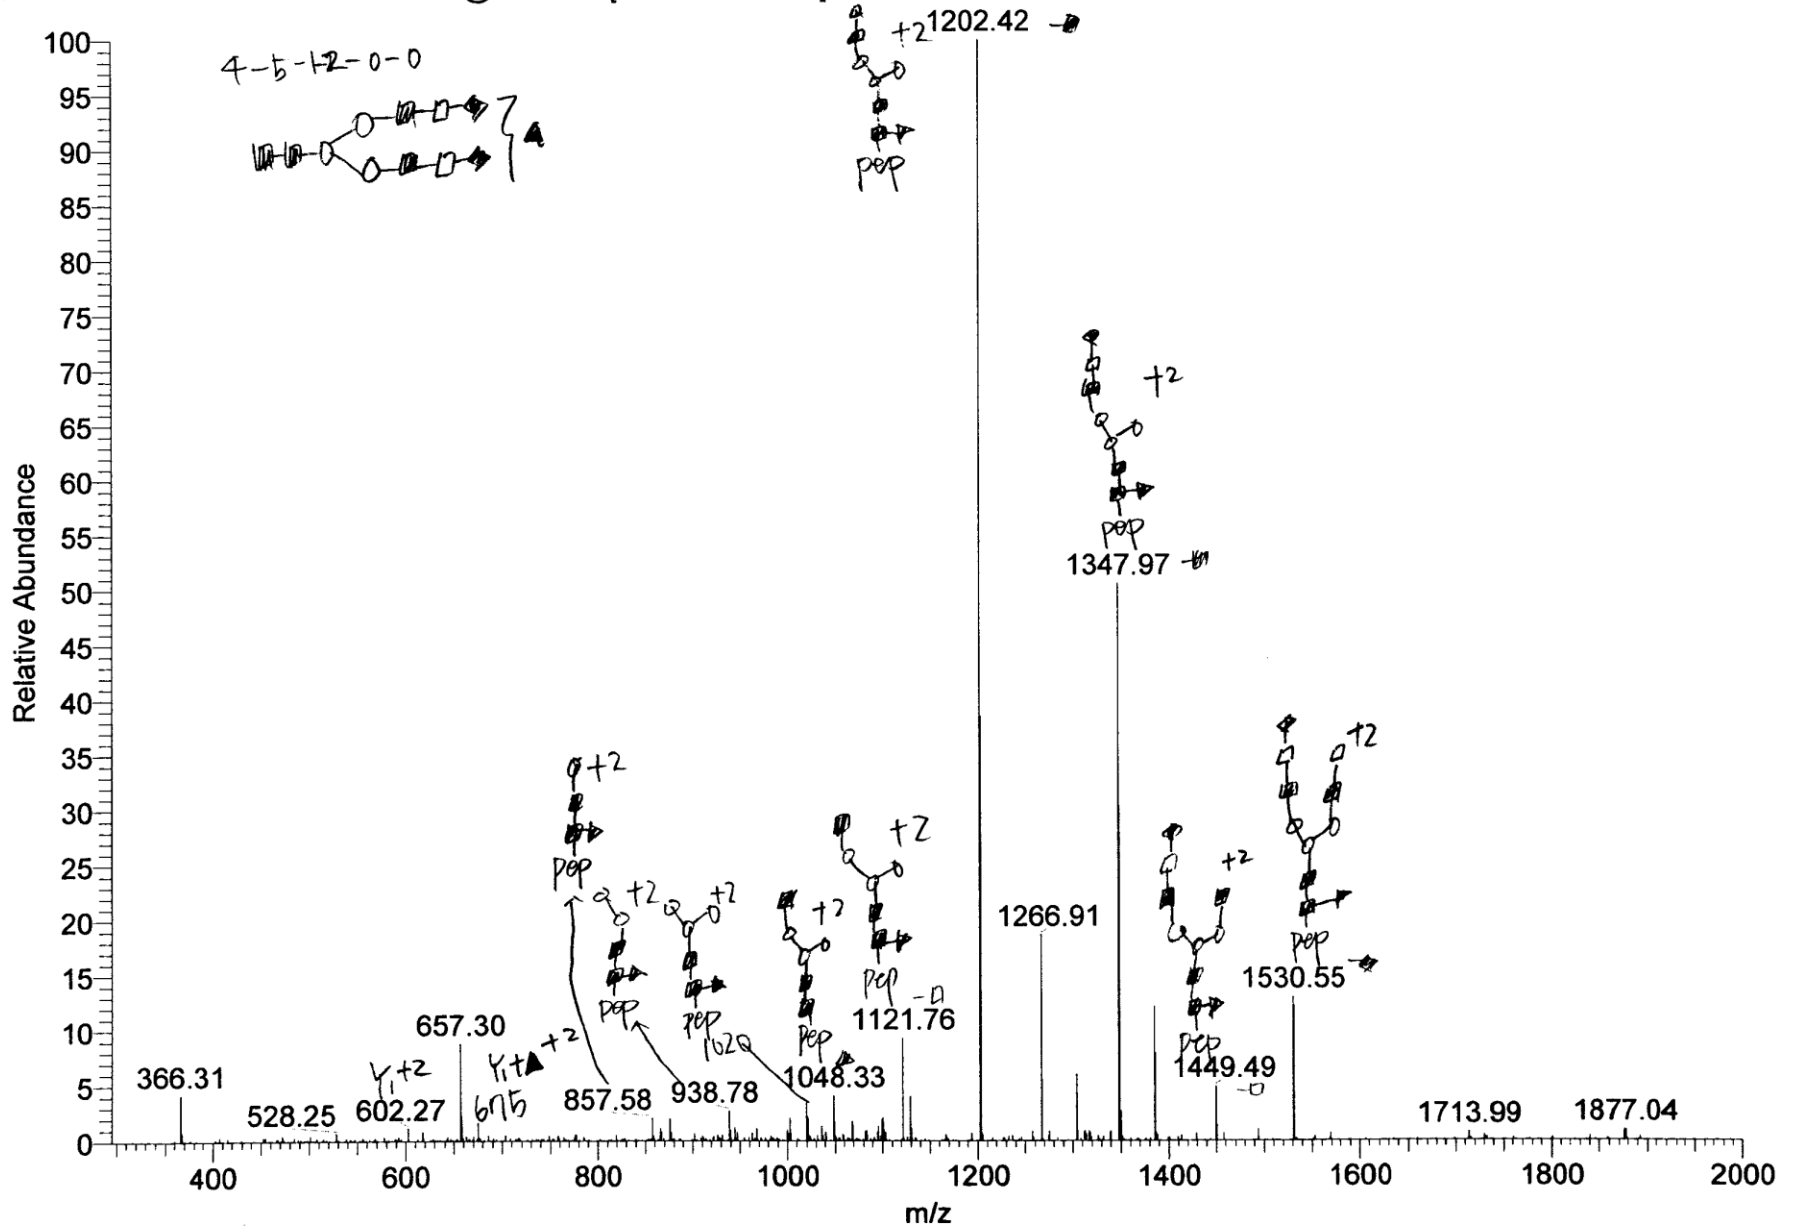

# HexNAc4Hex6dHex1NeuAc1

PSAH\_300ng\_5B\_masslists\_071312\_01 #663 RT: 18.91 AV: 1 NL: 8.58E3  
T: FTMS + c NSI d Full ms2 1074.48@cid35.00 [285.00-2000.00]

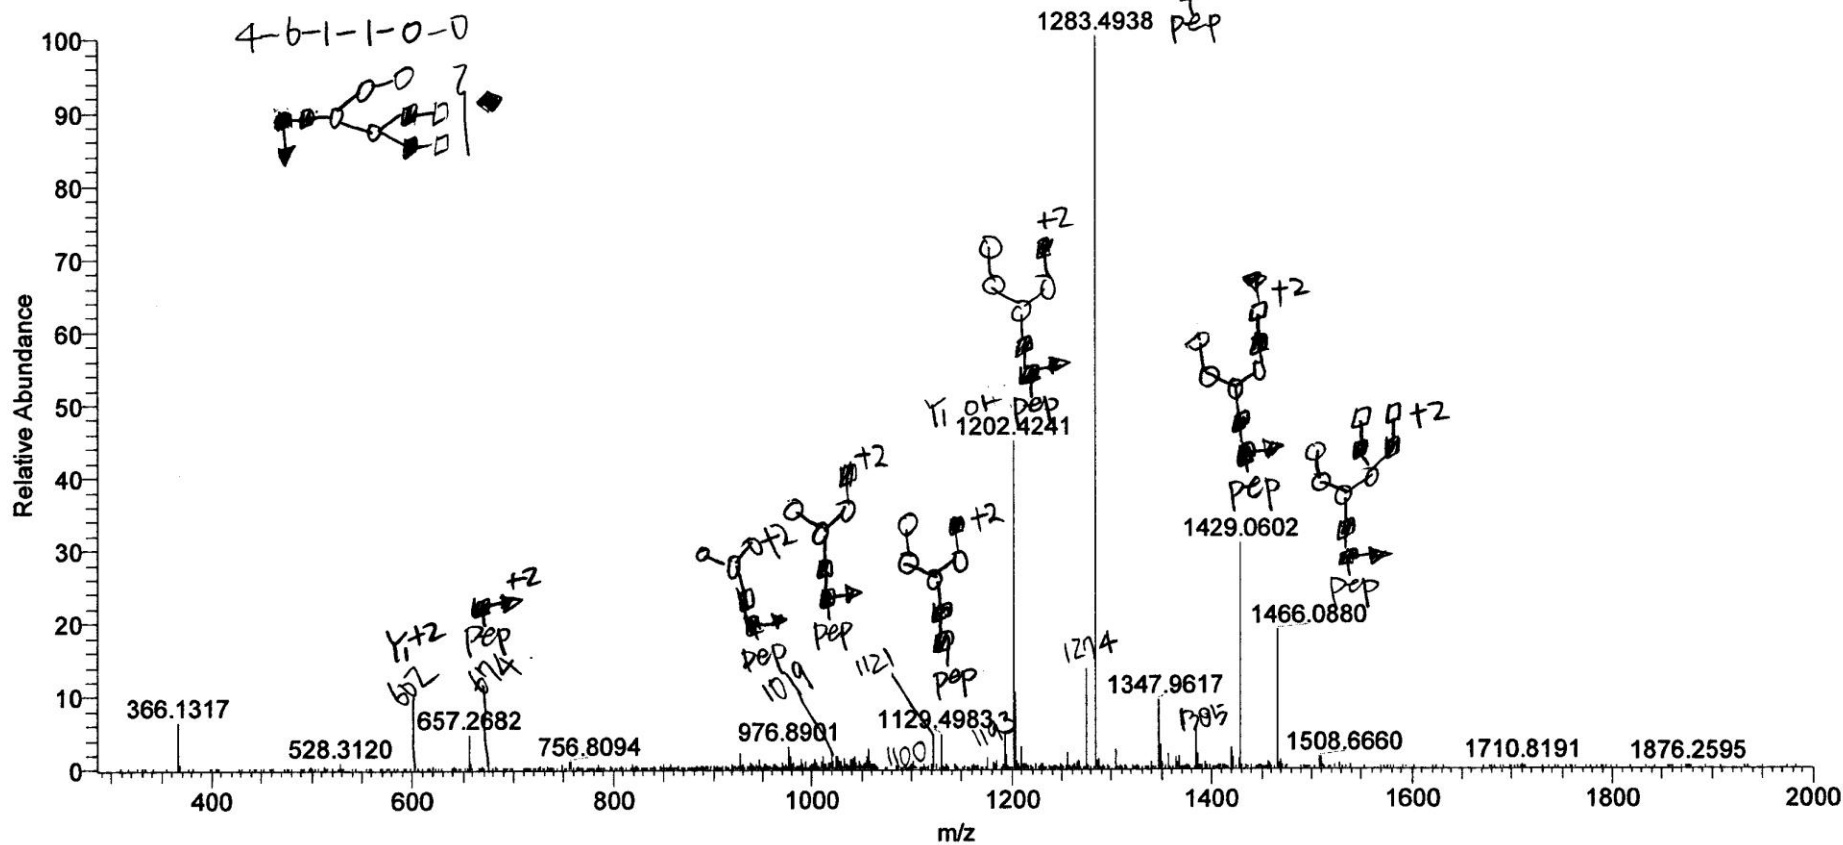

# HexNAc4Hex6dHex2NeuAc1

7/13/2017 10:35:40 AM

PSAH\_300ng\_5B\_masslists\_071312\_01 #680 RT: 19.04 AV: 1 NL: 1.66E3

T: ITMS + c NSI d Full ms2 1122.82@cid35.00 [295.00-2000.00]

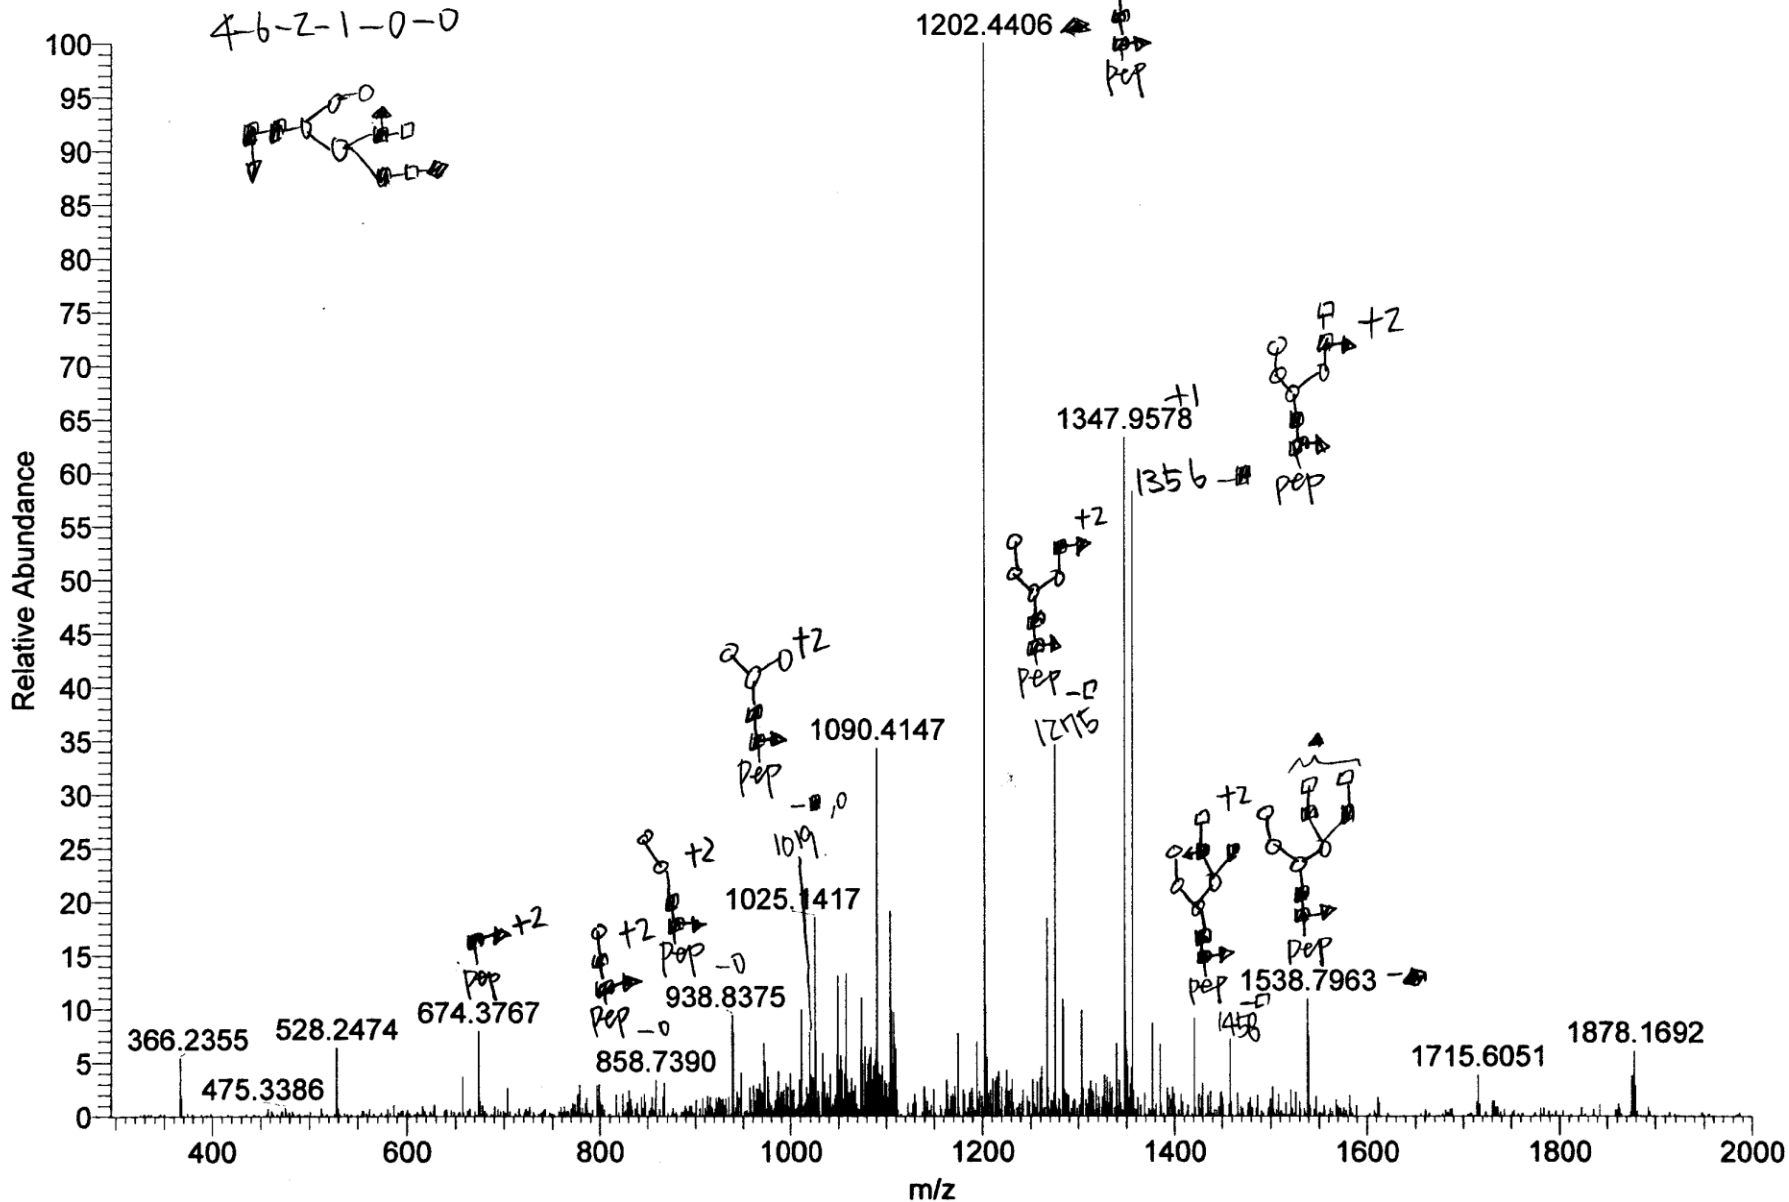

# HexNAc5Hex3dHex1NeuAc1

6/30/2017 12:24:11 PM

PSA\_2ug\_5B\_063012\_01#1012 RT: 19.56 AV: 1 NL: 1.41E5

T: ITMS + c NSI d Full ms2 980.46@cid35.00 [255.00-2000.00]

+7, 980, 1267, 2977, 3576

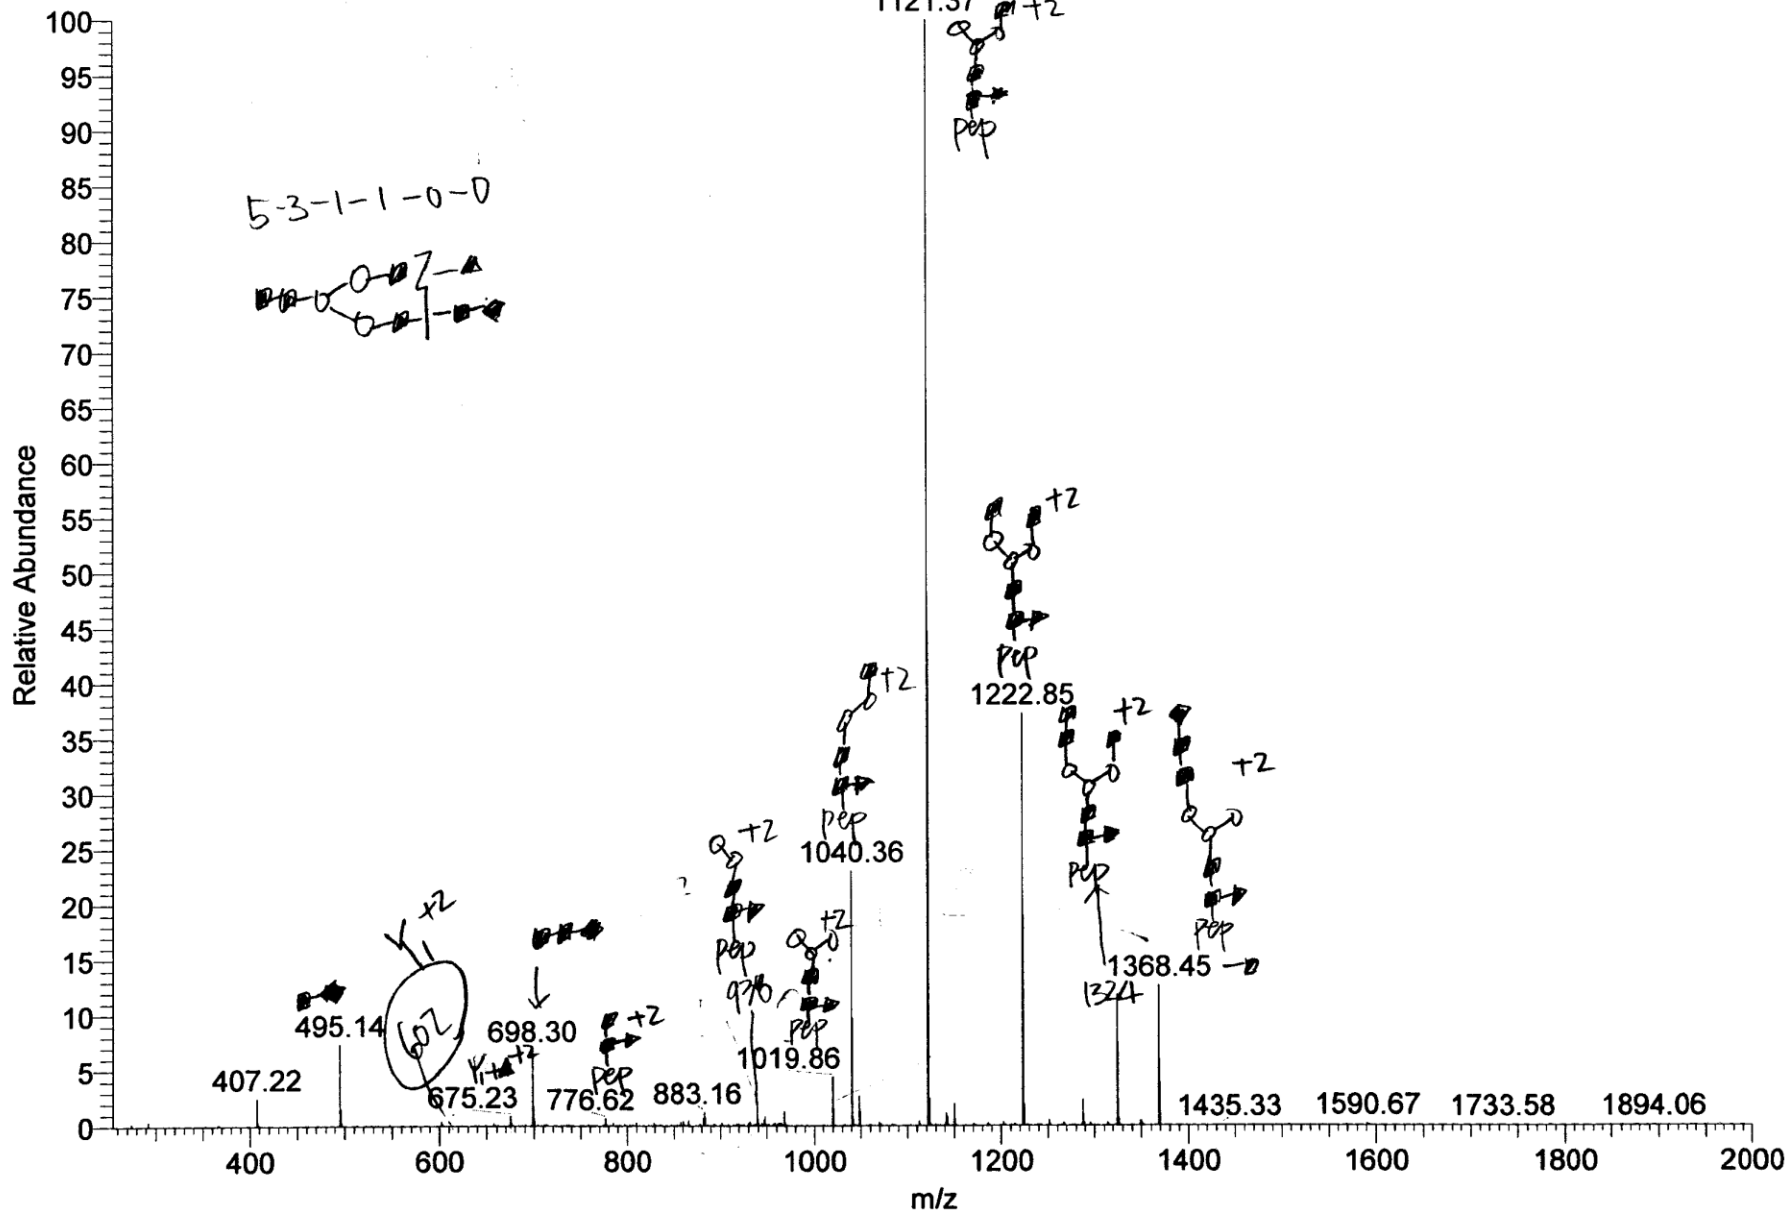





# HexNAc5Hex4dHex1

PSAH\_300ng\_5B\_masslists\_071312\_01 #535 RT: 17.46 AV: 1 NL: 5.35E4  
T: ПMS + c NSI d Full ms2 937.10@cid35.00 [245.00-2000.00]

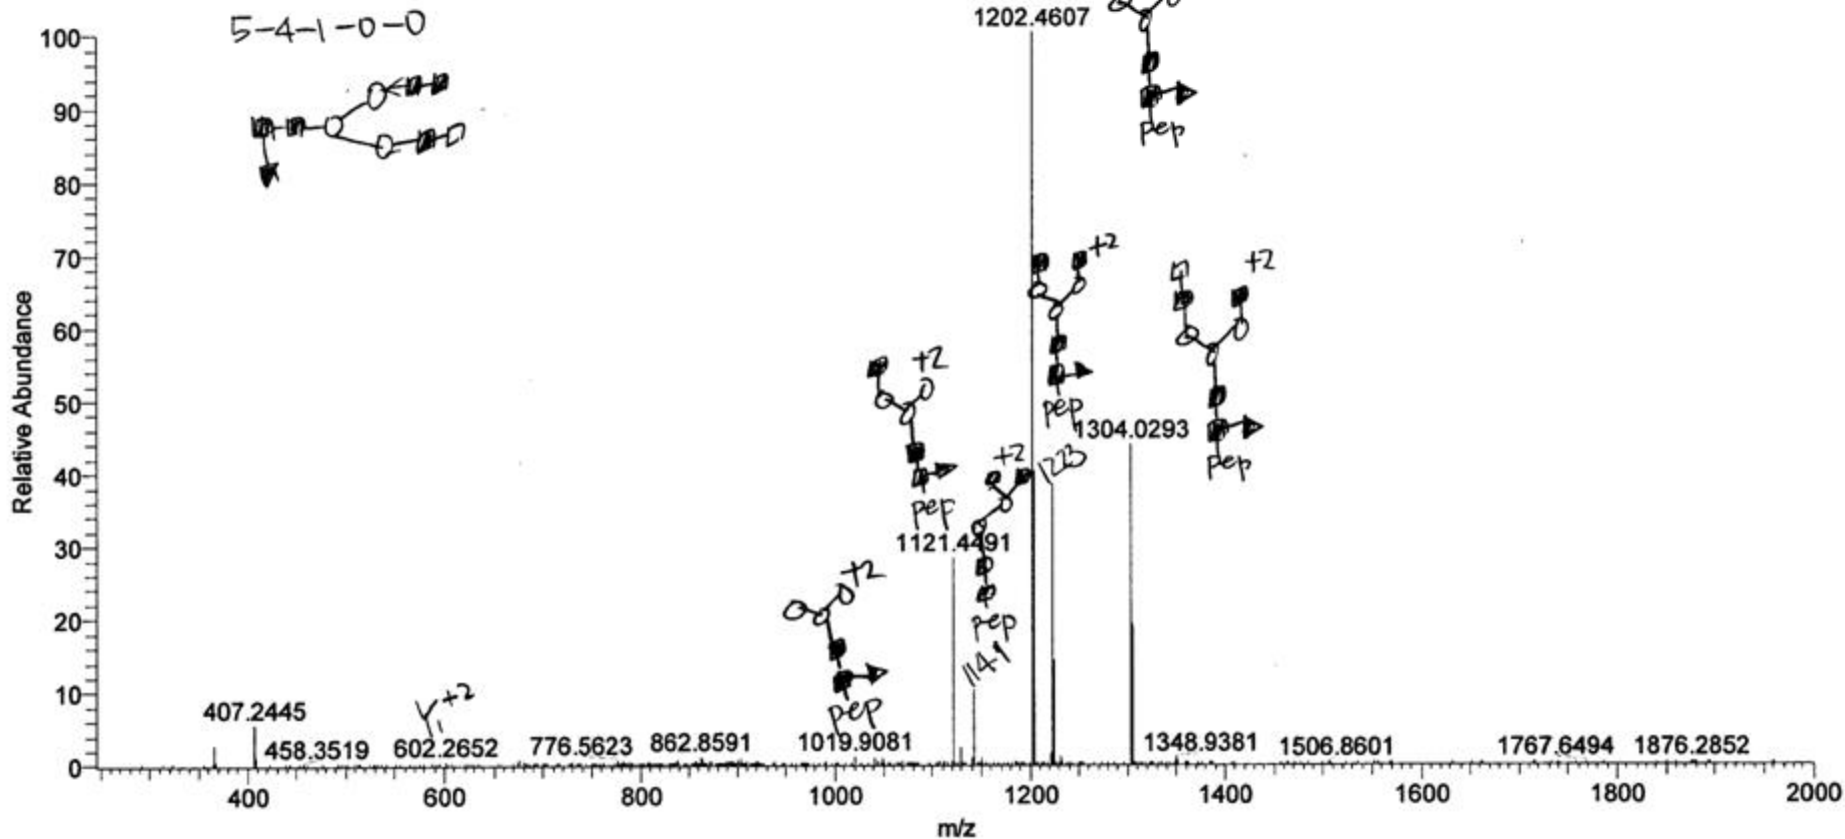

# HexNAc5Hex4dHex1s/p1

6/30/2011 24:11 PM

PSA\_2ug\_5B\_063012\_01 #1080 RT: 19.91 AV: 1 NL: 9.93E3

T: ITMS + c NSI d Full ms2 964.09@cid35.00 [255.00-2000.00] +3, 963.7606

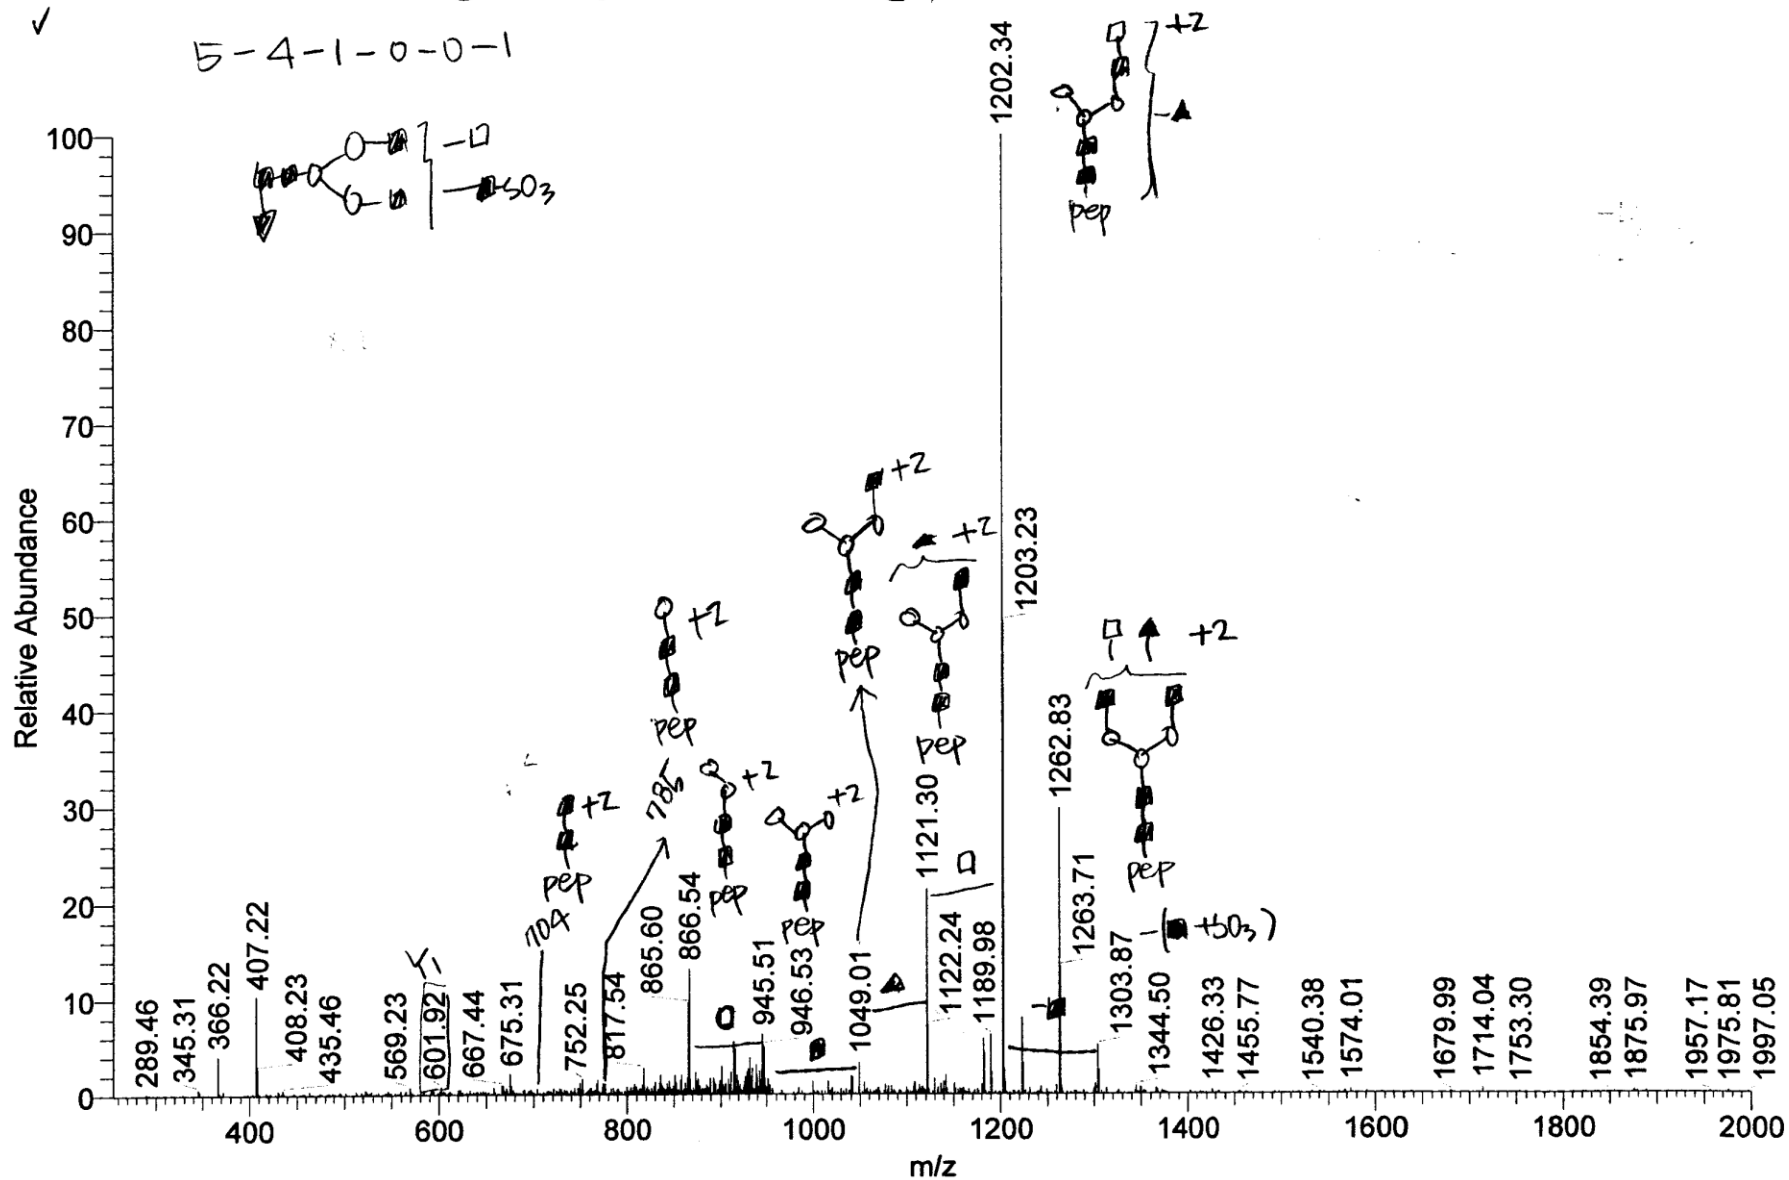

# HexNAc5Hex4NeuAc1

6/30/2017 24:11 PM

PSA\_2ug\_5B\_063012\_01 #987 RT: 19.43 AV: 1 NL: 1.43E5  
T: ITMS + c NSI d Full ms2 985.79@cid35.00 [260.00-2000.00]

T<sub>3</sub>, 985.4571, 2953.349

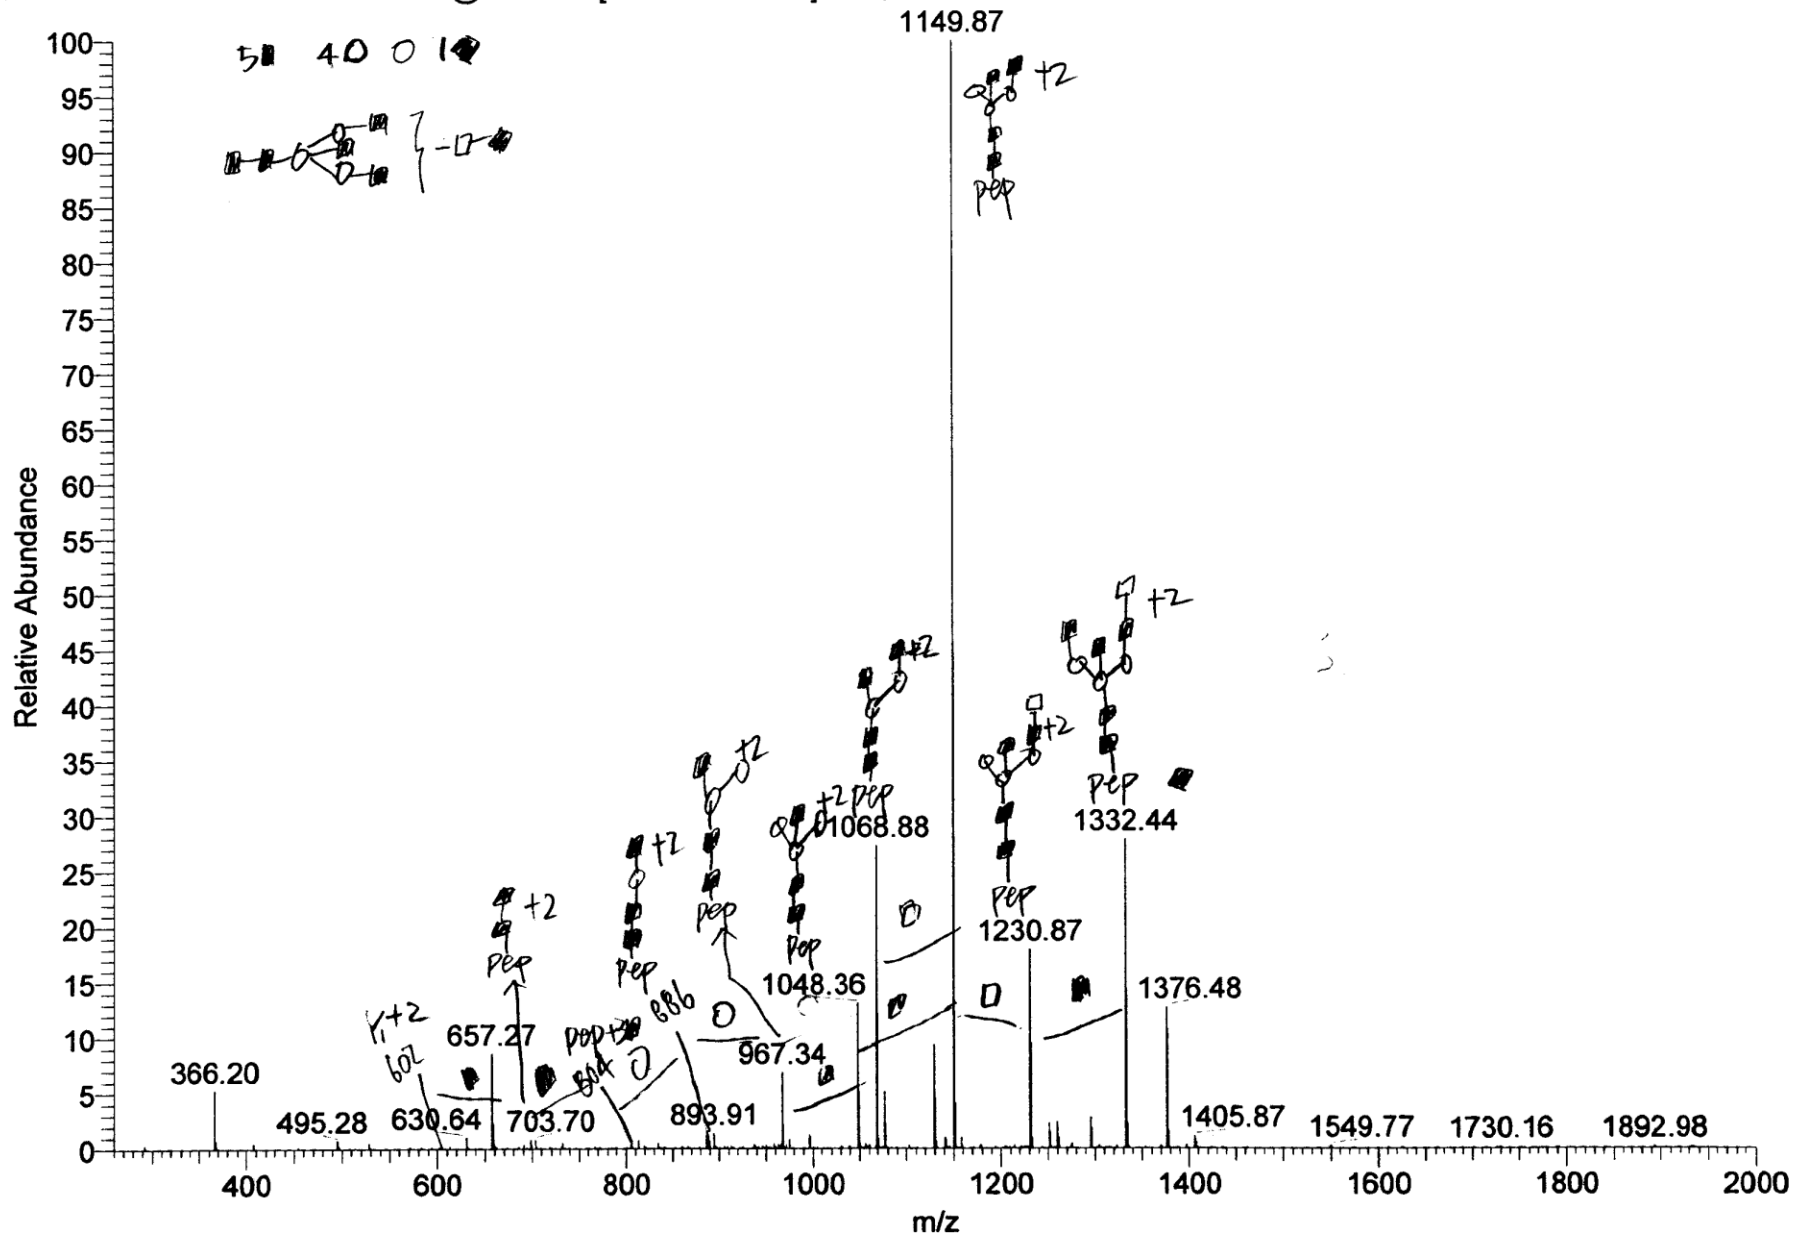

# HexNAc5Hex4dHex1NeuAc1

6/30/2017 12:24:11 PM

PSA\_2ug\_5B\_063012\_01 #993 RT: 19.46 AV: 1 NL: 3.81E4  
T: ITMS + c NSI d Full ms2 1034.48@cid35.00 [270.00-2000.00]

+3. 1034.143. 3099.488

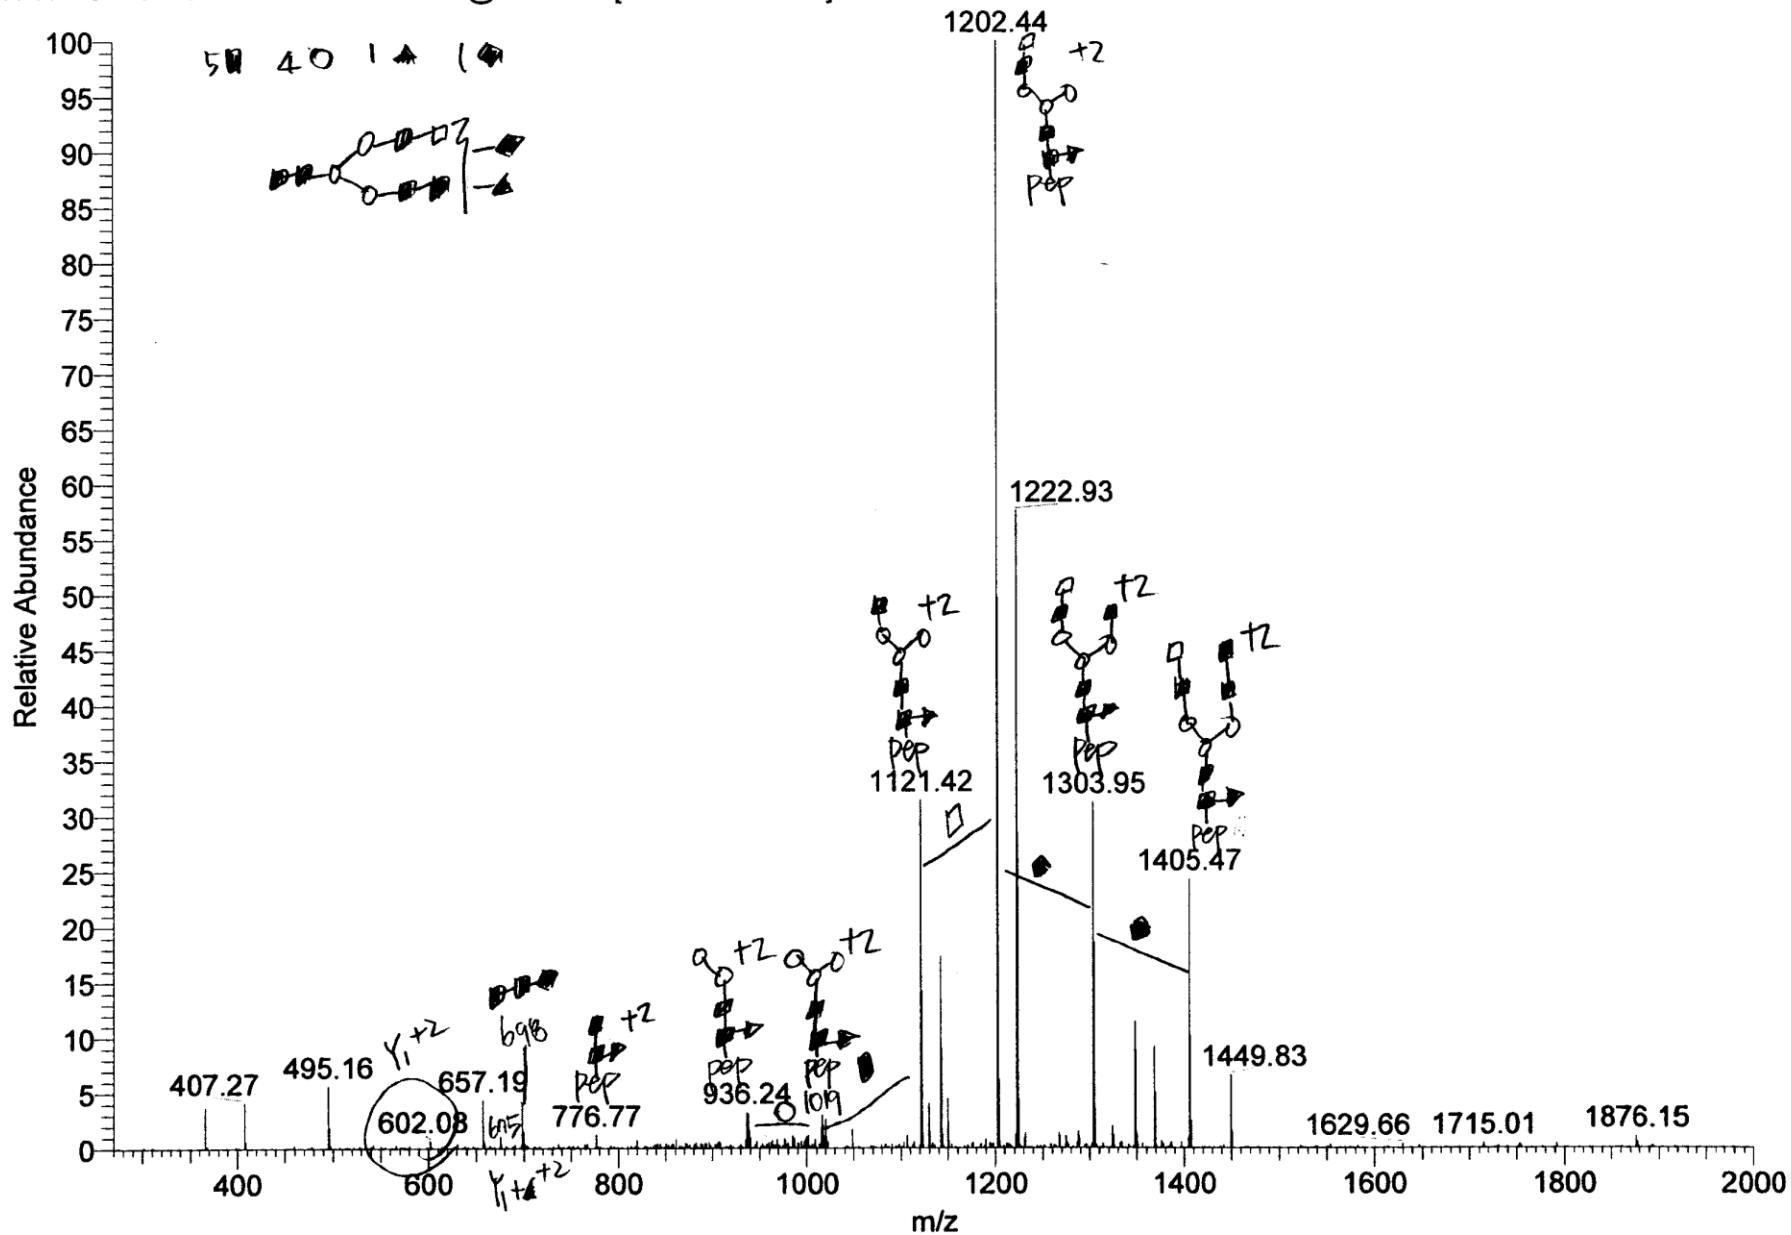

# HexNAc5Hex4dHex2NeuAc1

PSAH\_300ng\_5B\_masslists\_071312\_01 #695 RT: 19.13 AV: 1 NL: 3.09E3  
 F: ITMS + c NSI d Full ms2 1082.82@cid35.00 [285.00-2000.00]

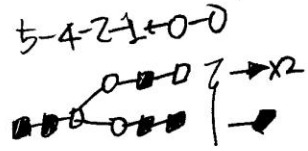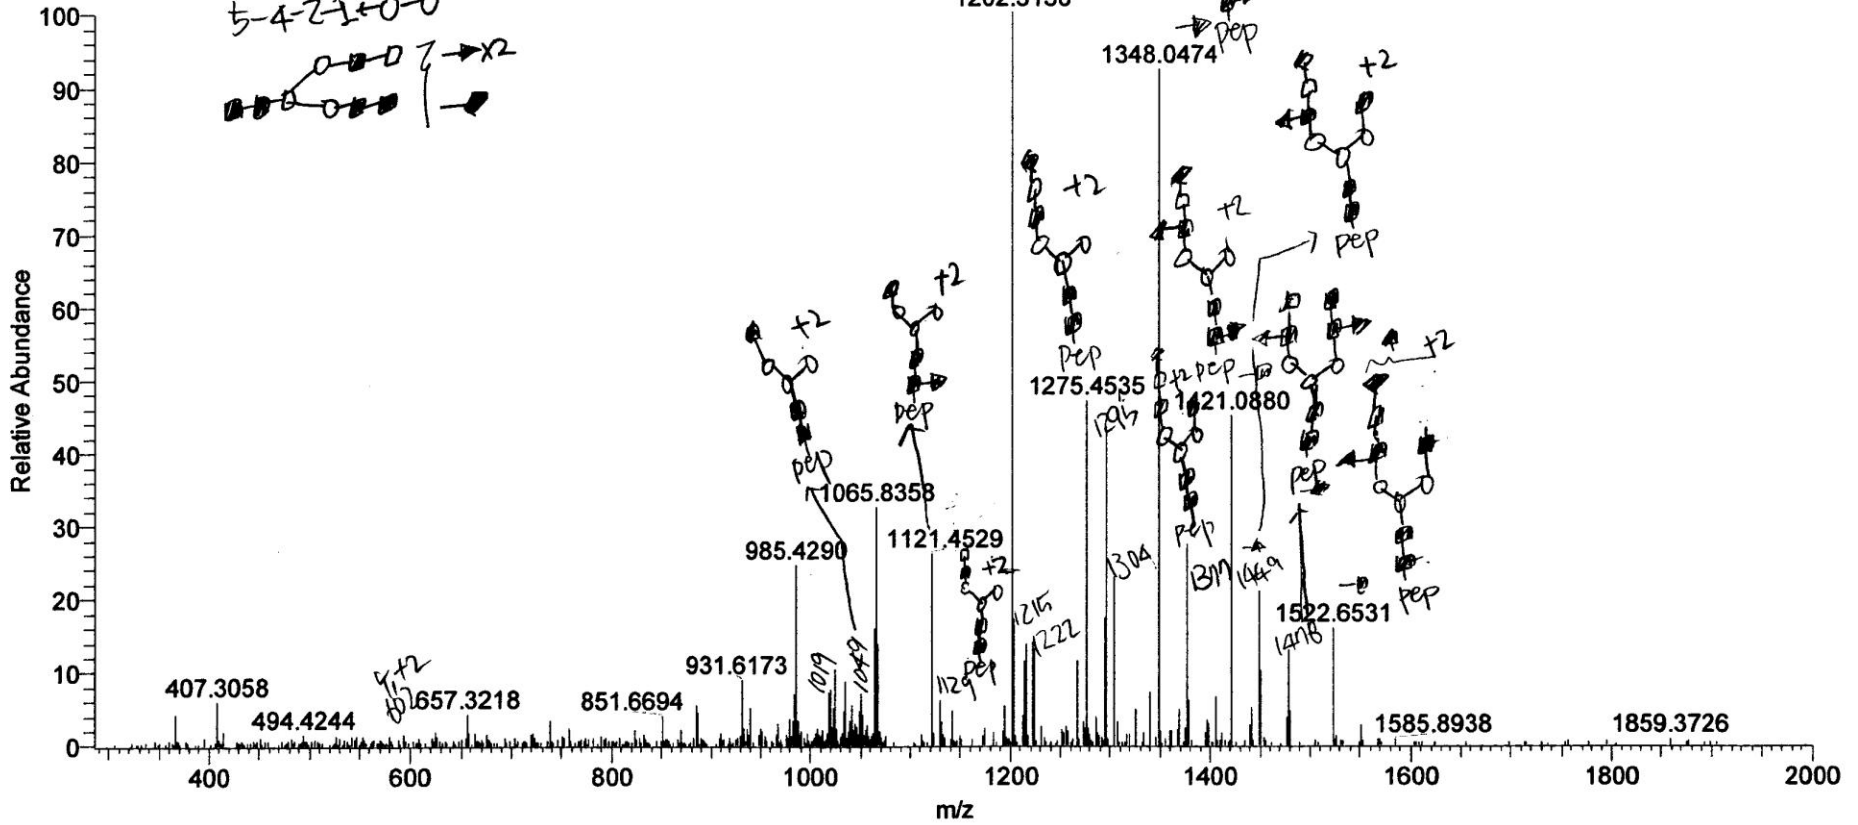

# HexNAc5Hex4dHex1NeuAc2

PSAH\_300ng\_5B\_masslists\_071312\_01#962 RT: 21.47 AV: 1 NL: 2.08E5  
 F: ITMS + c NSI d Full ms2 1131.14@cid35.00 [300.00-2000.00]

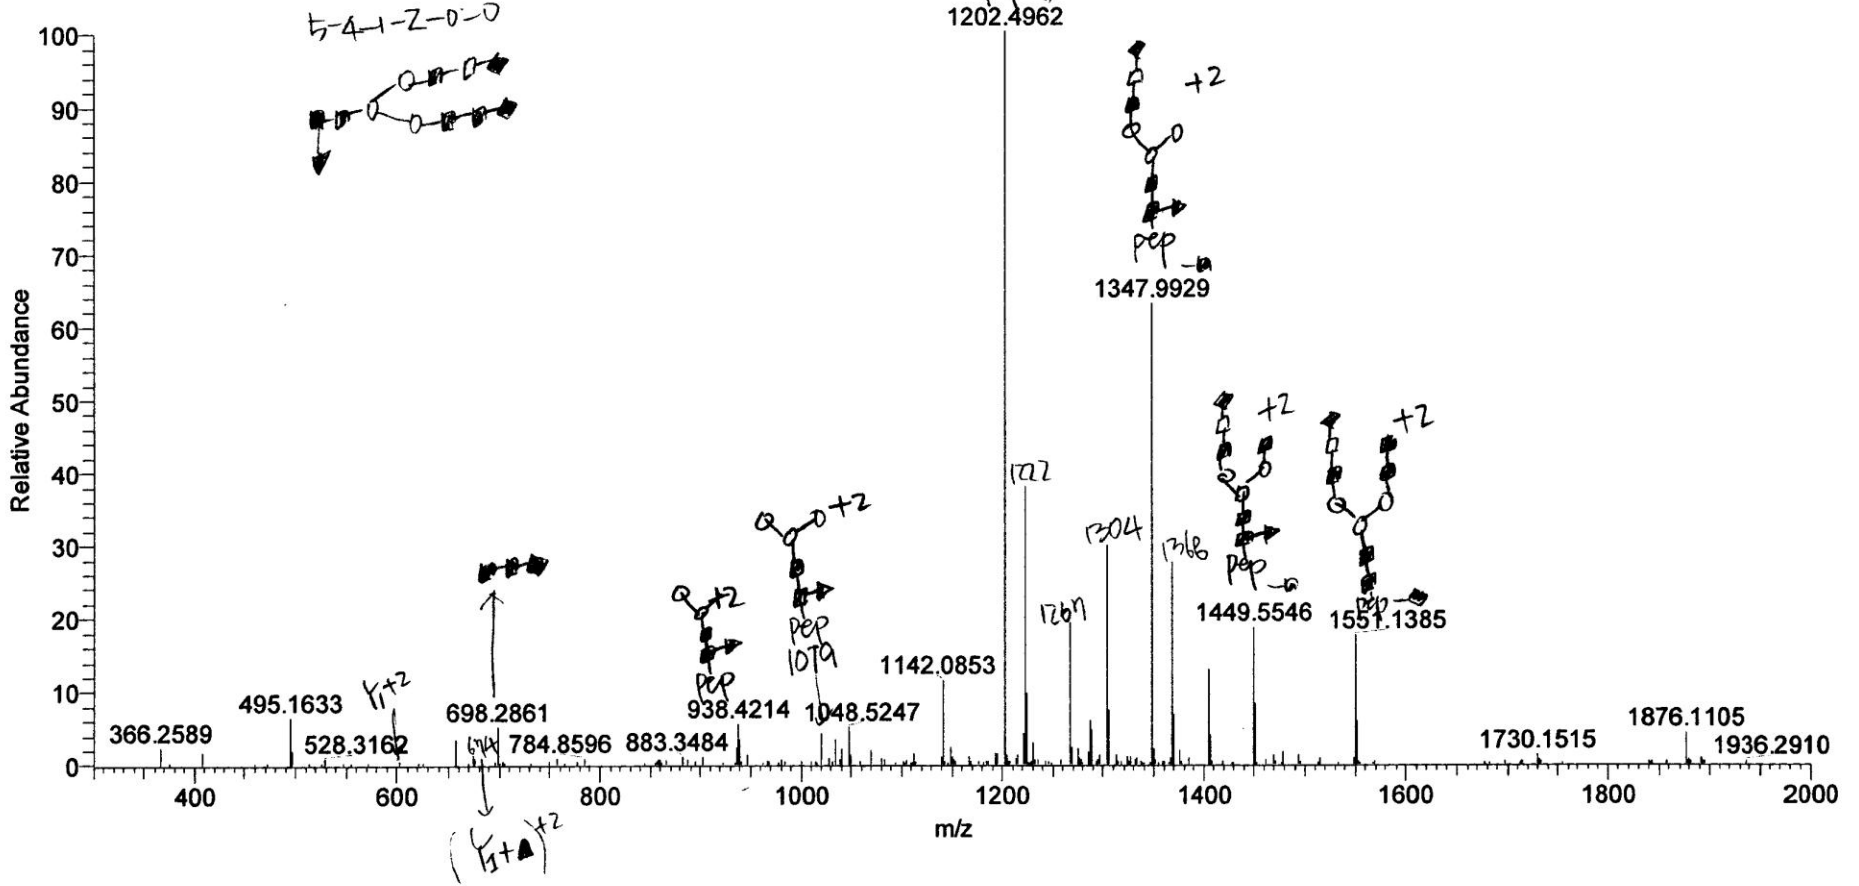

# HexNAc5Hex4NeuAc2

PSAH\_300ng\_5B\_masslists\_071312\_01 #1005 RT: 21.76 AV: 1 NL: 2.79E4  
F: ITMS + c NSI.d Full ms2 1082.82@cid35.00 [285.00-2000.00]

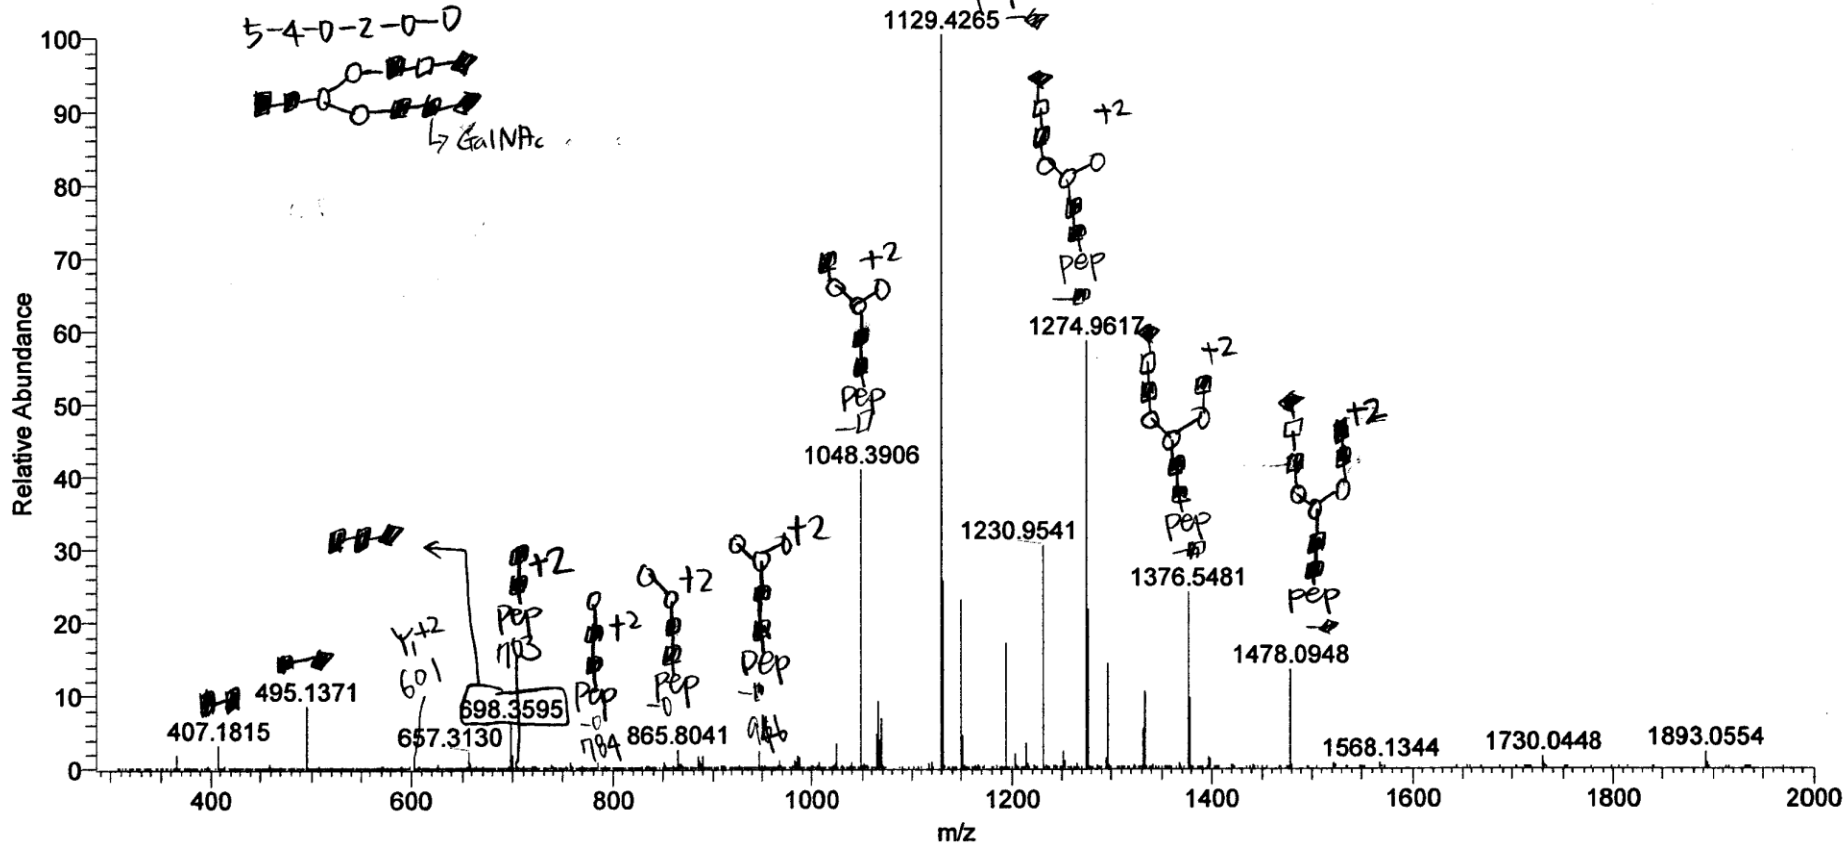





# HexNAc5Hex5dHex1NeuAc1

PSAH\_300ng\_5B\_masslists\_071312\_01 #676 RT: 19.01 AV: 1 NL: 6.86E3  
F: ITMS + c NSI d Full ms2 1088.15@cid35.00 [285.00-2000.00]

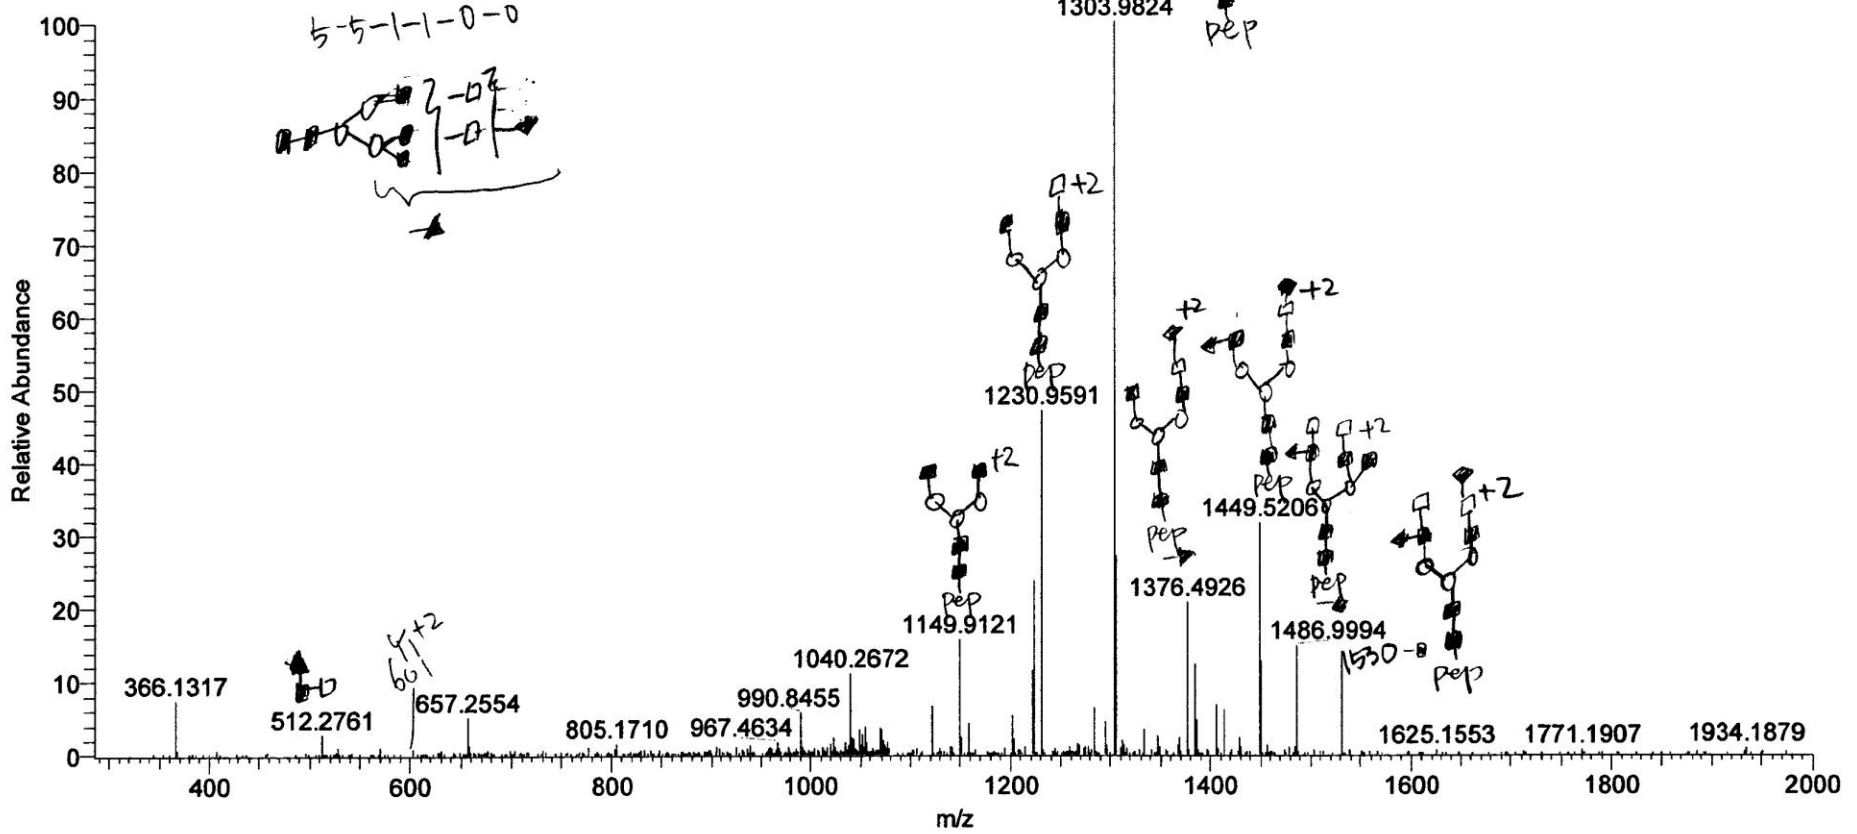

# HexNAc5Hex5NeuAc2

6/30/2017 24:11 PM

PSA 2ug\_5B\_063012\_01 #1416 RT: 21.75 AV: 1 NL: 9.28E3  
T: ITMS + c NSI d Full ms2 1137.17@cid35.00 [300.00-2000.00]

m/z 1136.501 3406.4195

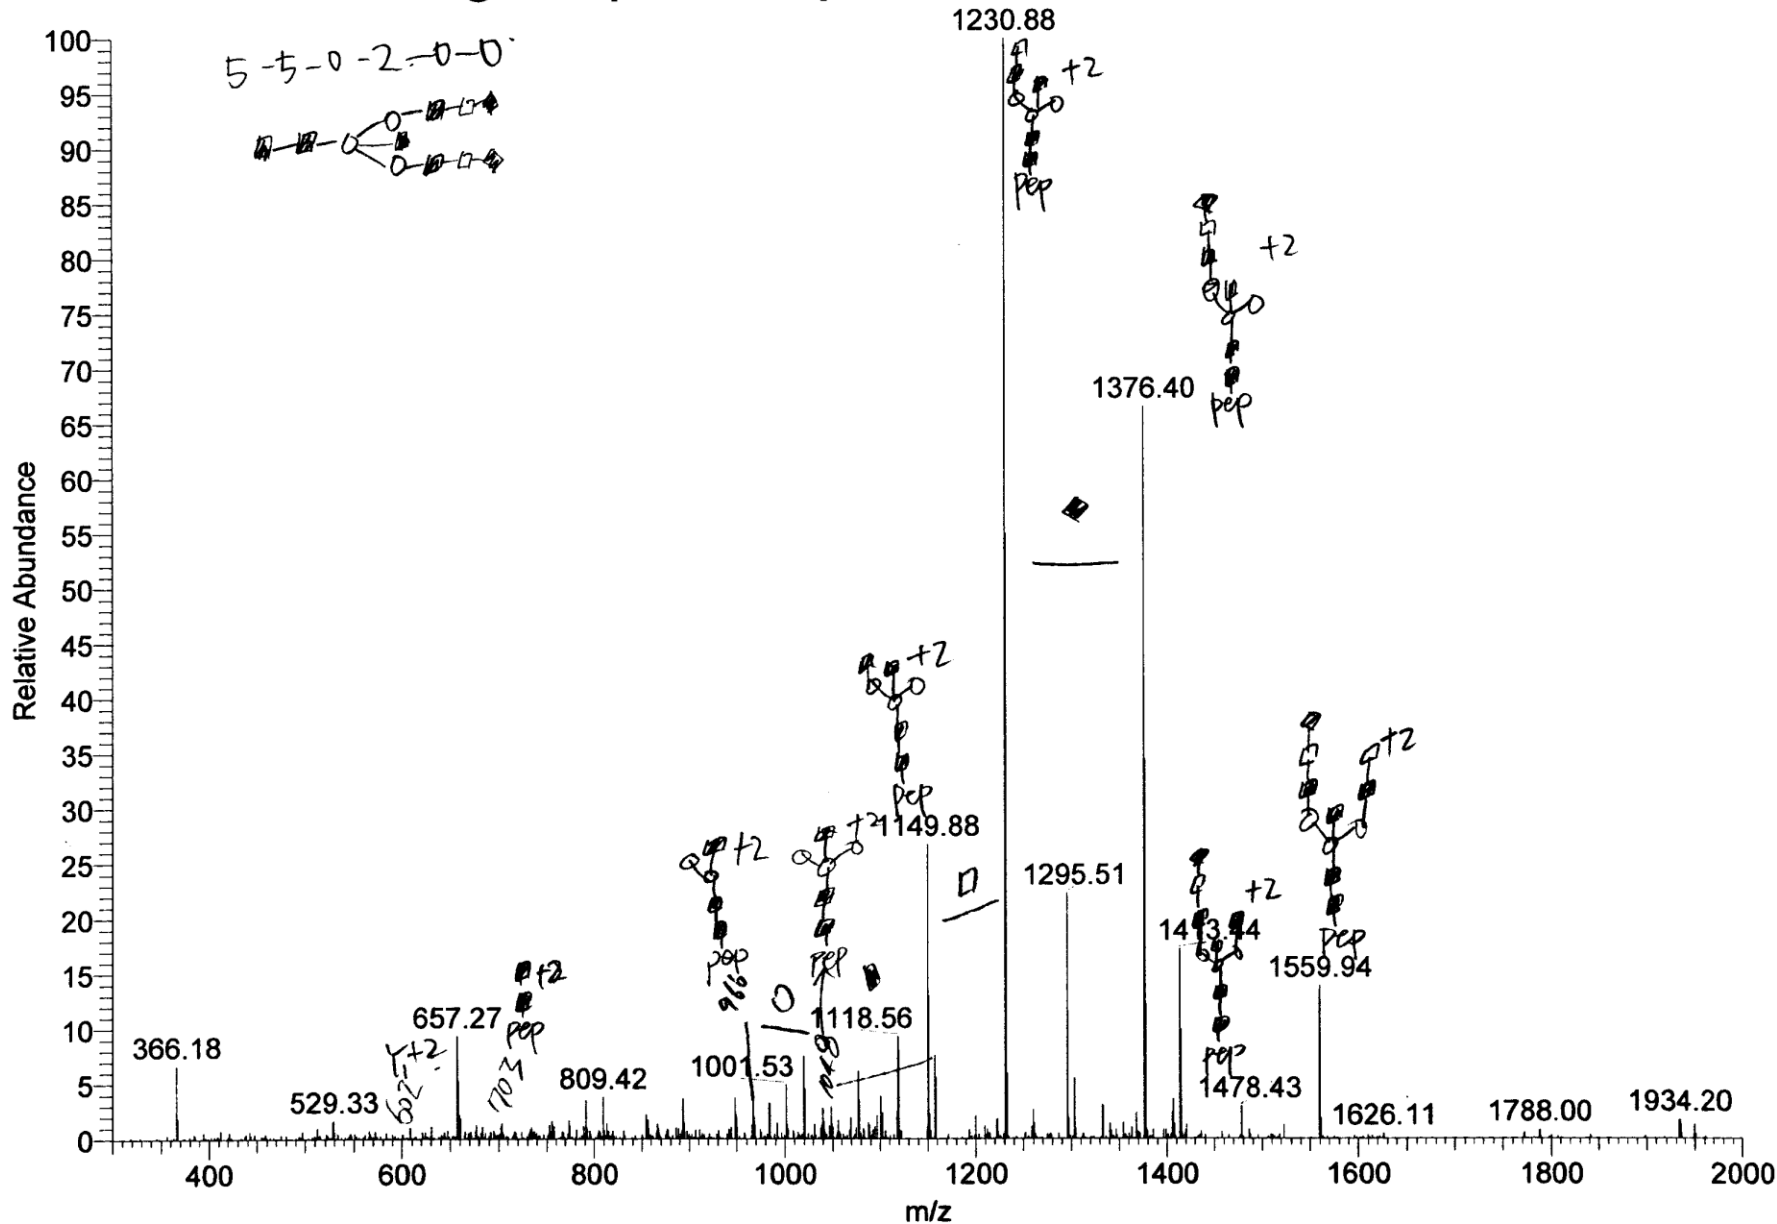

# HexNAc5Hex6dHex1NeuAc2

PSAH\_300ng\_50 masslists\_071312\_01#916 RT: 21.08 AV: 1 NL: 5.42E3  
T: ITMS + c NSI Full ms2 1239.20@cid35.00 [330.00-2000.00]

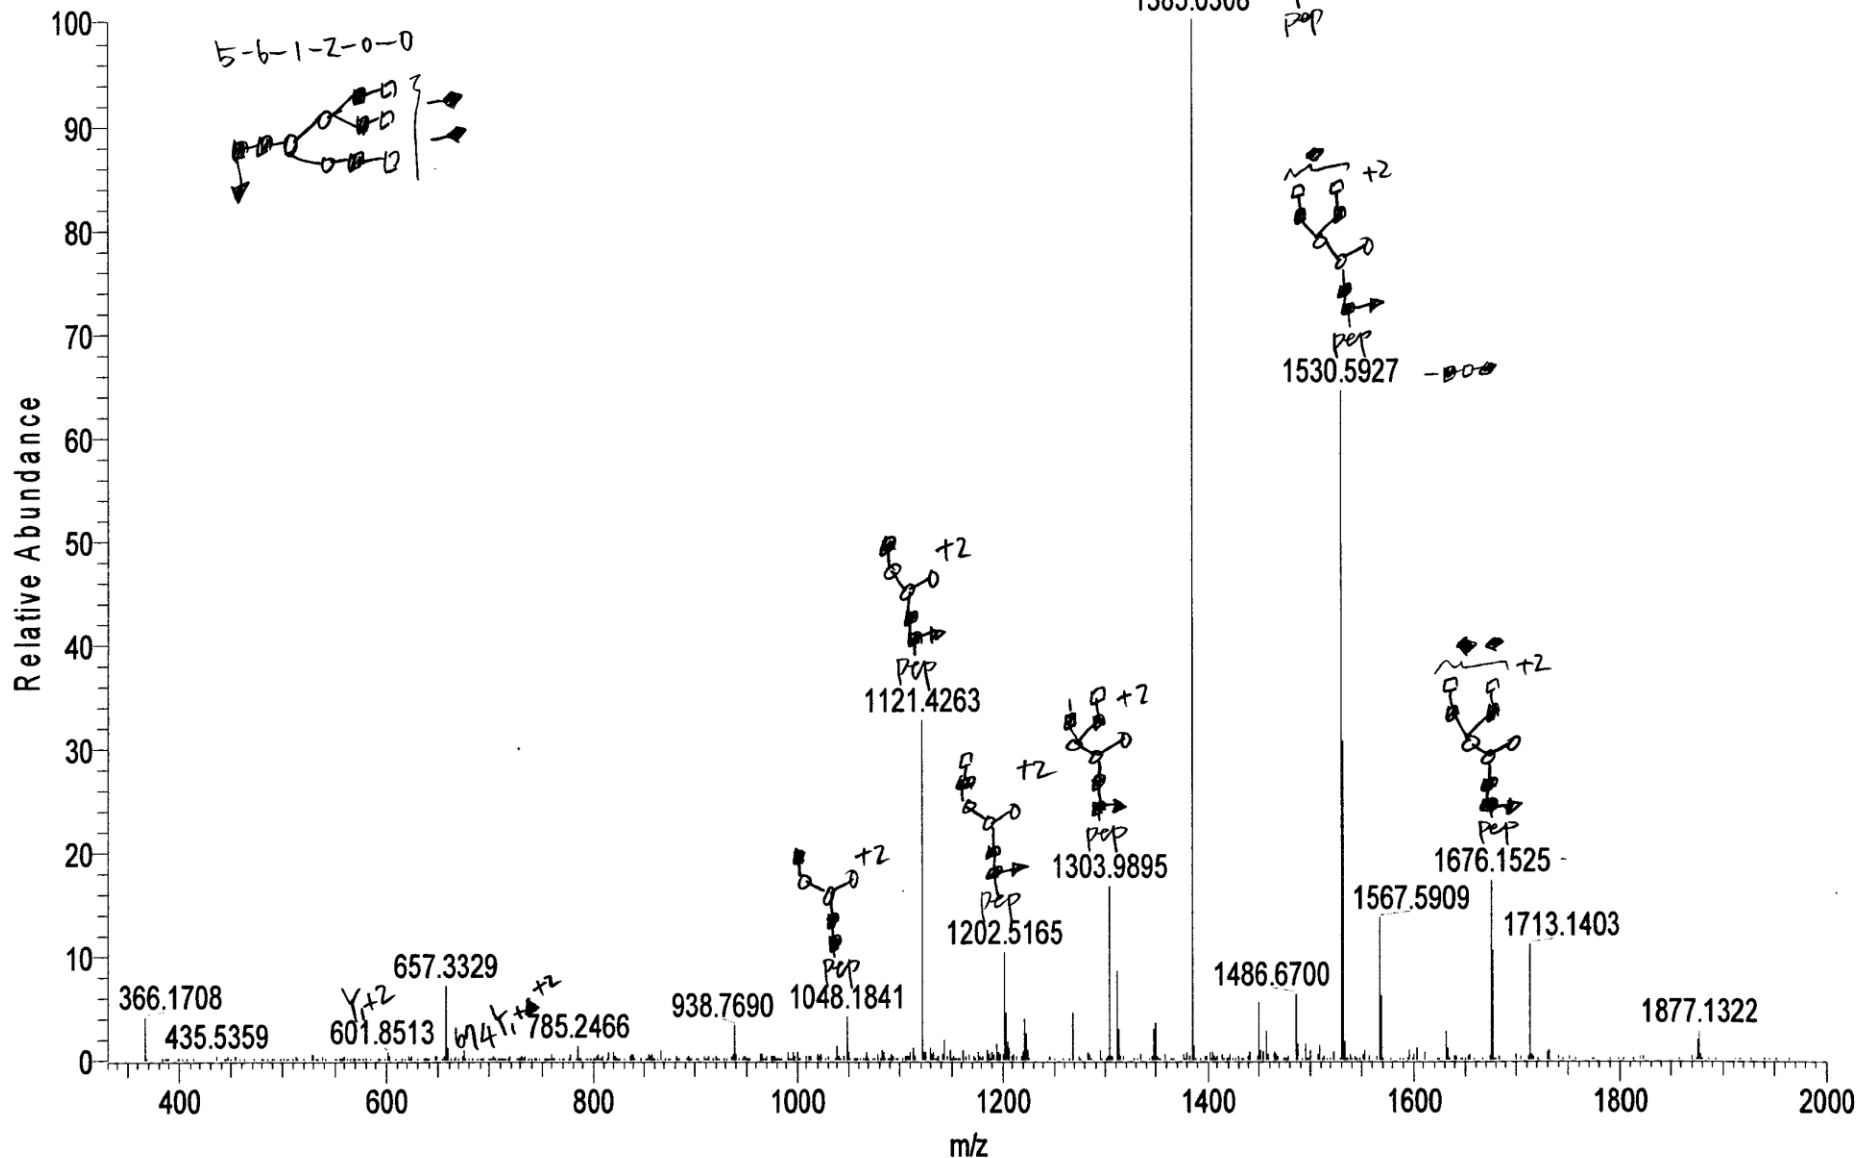



# HexNAc5Hex6dHex1NeuAc1

7/13/2017 10:35:40 AM

PSAH\_300ng\_5B\_masslists\_071312\_01 #633 RT: 18.56 AV: 1 NL: 2.42E3

T: ITMS + c NSI d Full ms2 1142.17@cid35.00 [300.00-2000.00]

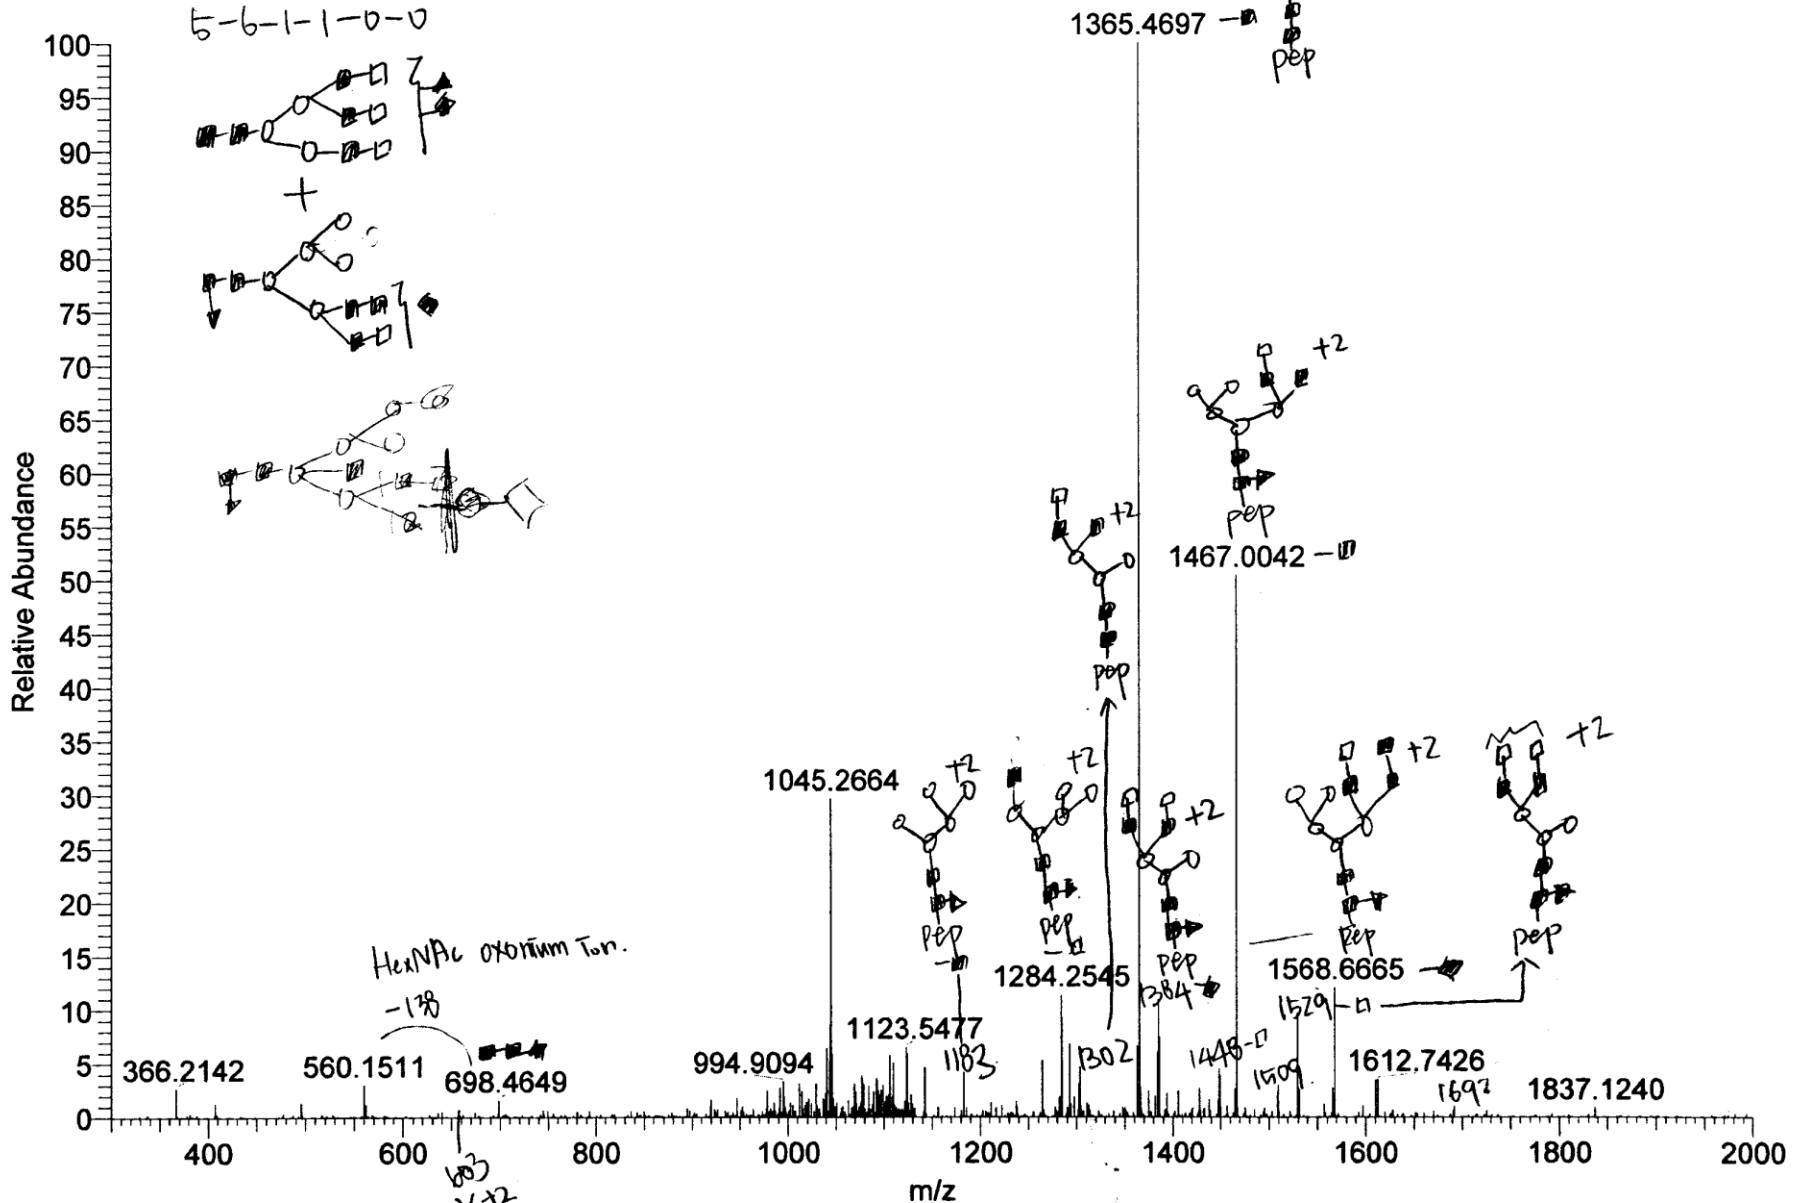

# HexNAc6Hex5dHex1NeuAc1

7/13/2017 10:35:40 AM

PSAH\_300ng\_5B\_masslists\_071312\_01 #657 RT: 18.83 AV: 1 NL: 2.07E3

T: ITMS + c NSI d Full ms2 1156.01@cid35.00 [305.00-2000.00]

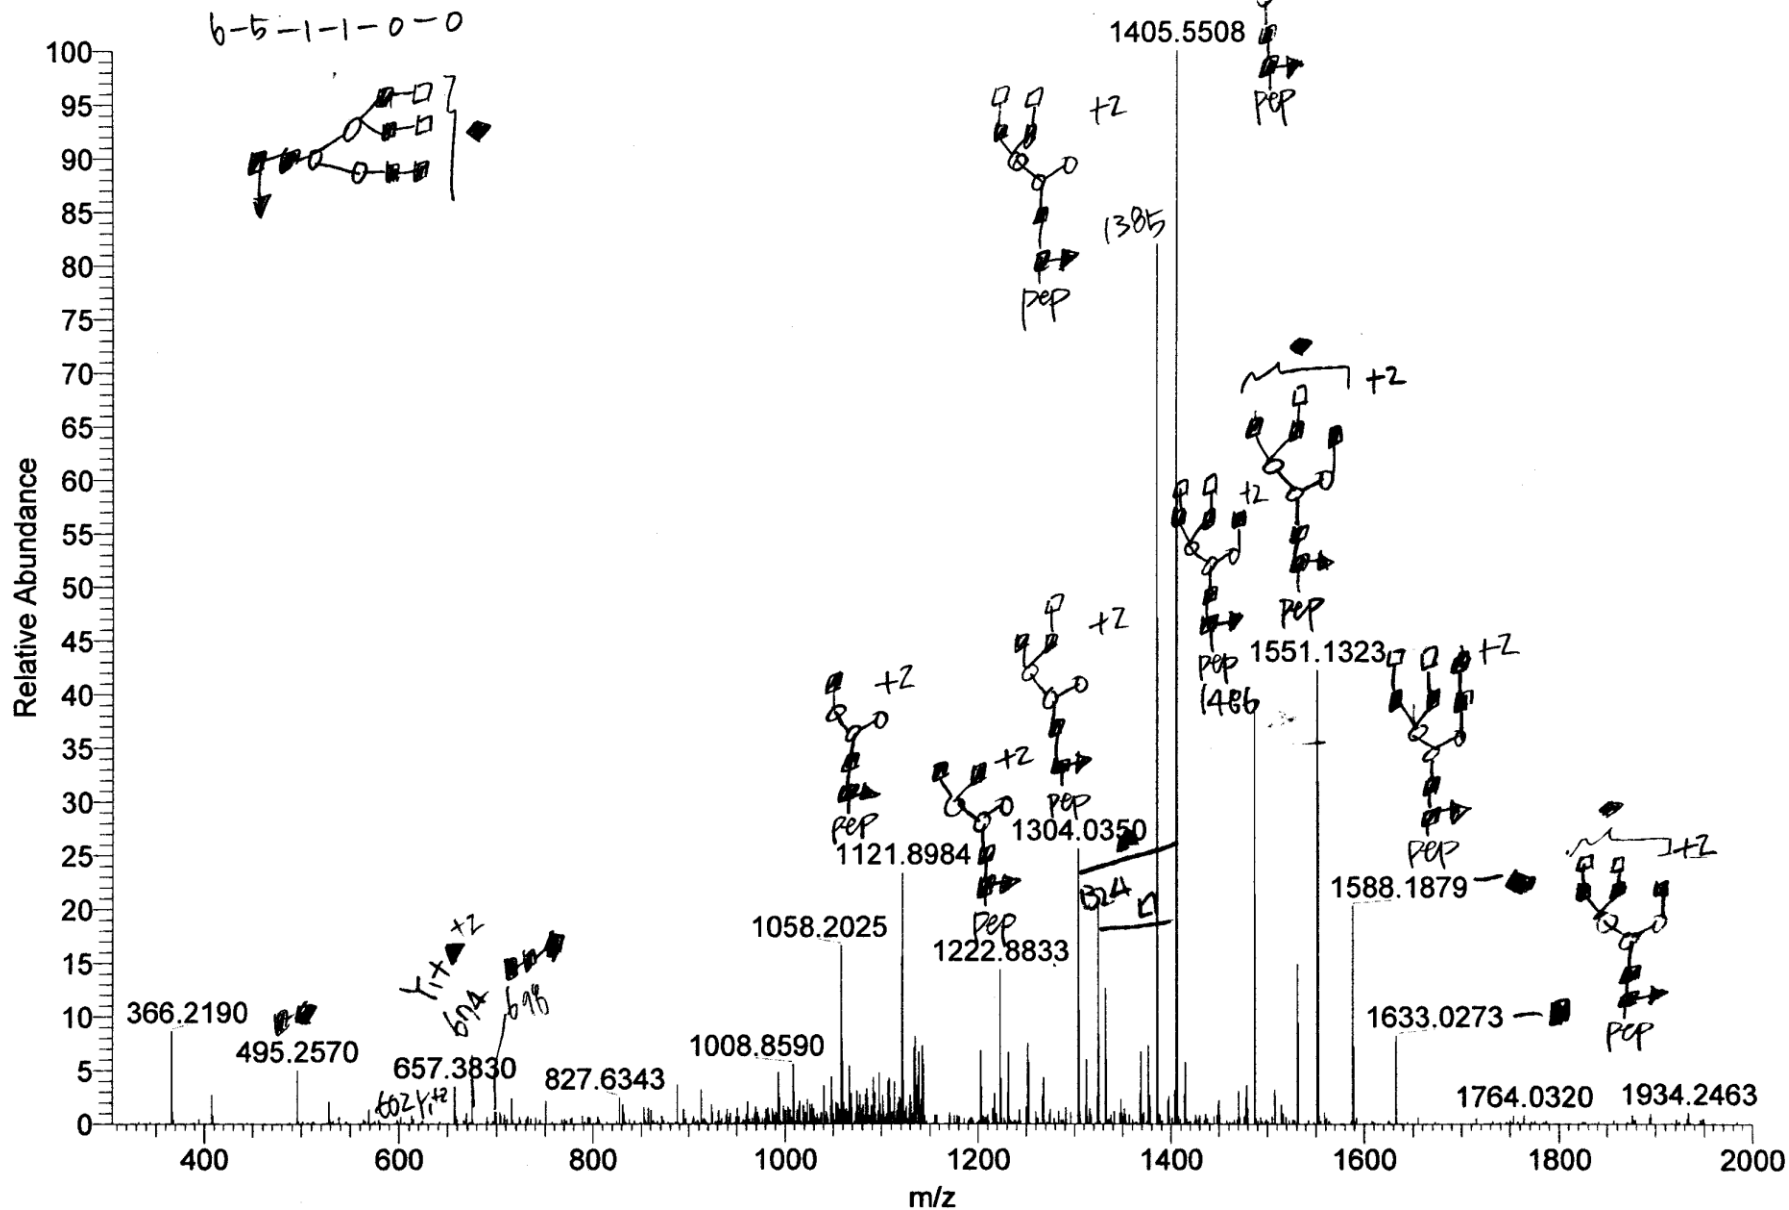

# HexNAc6Hex7dHex1NeuAc1

7/13/2017 1:35:40 AM

PSAH\_300ng\_5B\_masslists\_071312\_01 #638 RT: 18.62 AV: 1 NL: 3.78E3

T: ITMS + c NSI d Full ms2 1263.88@cid35.00 [335.00-2000.00]

1263.8813 +3

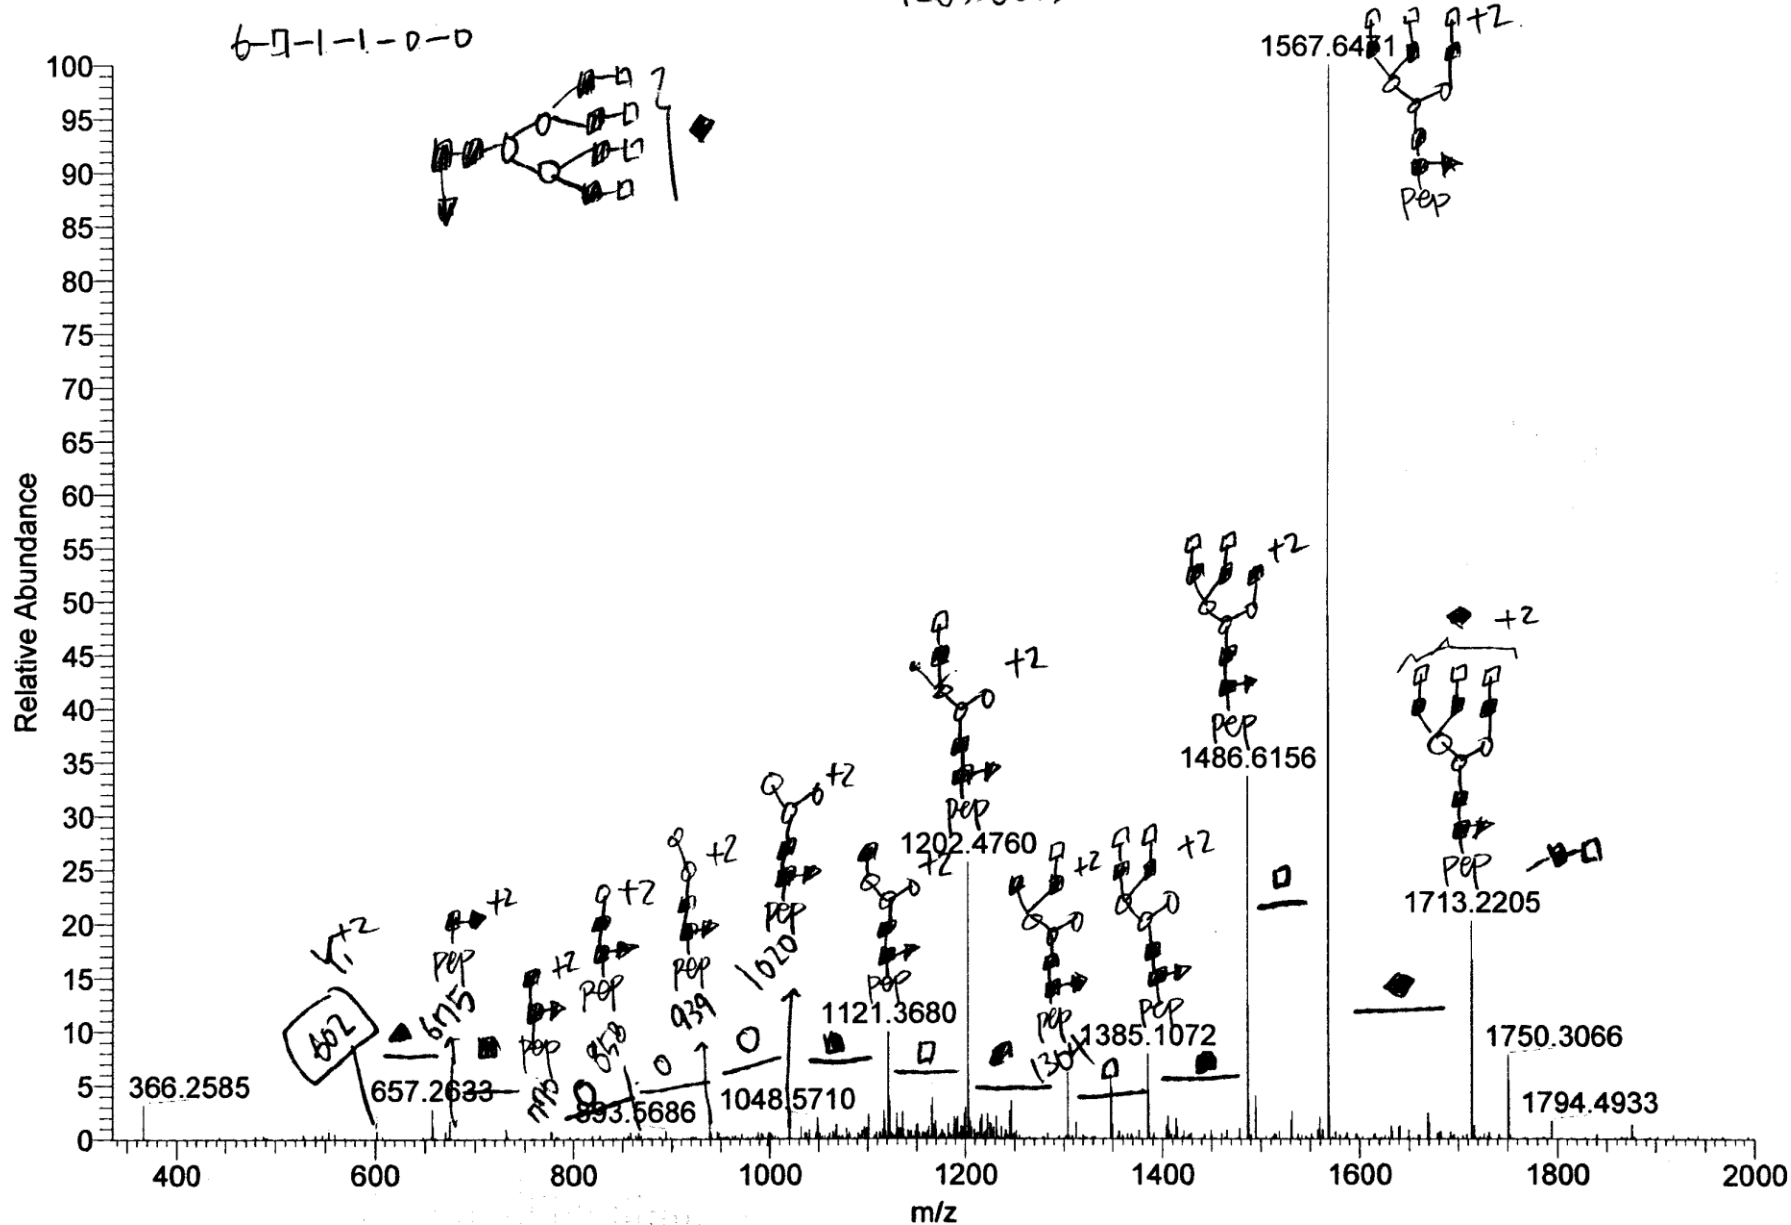



**Supplementary Figure 2.** HCD MS/MS of Sulfated/phosphorylated (*s/p*) Glycopeptide HexNAc5Hex4dHex1 *s/p*1. No diagnostic ions of sulfated/phosphorylated glycan residue was observed.

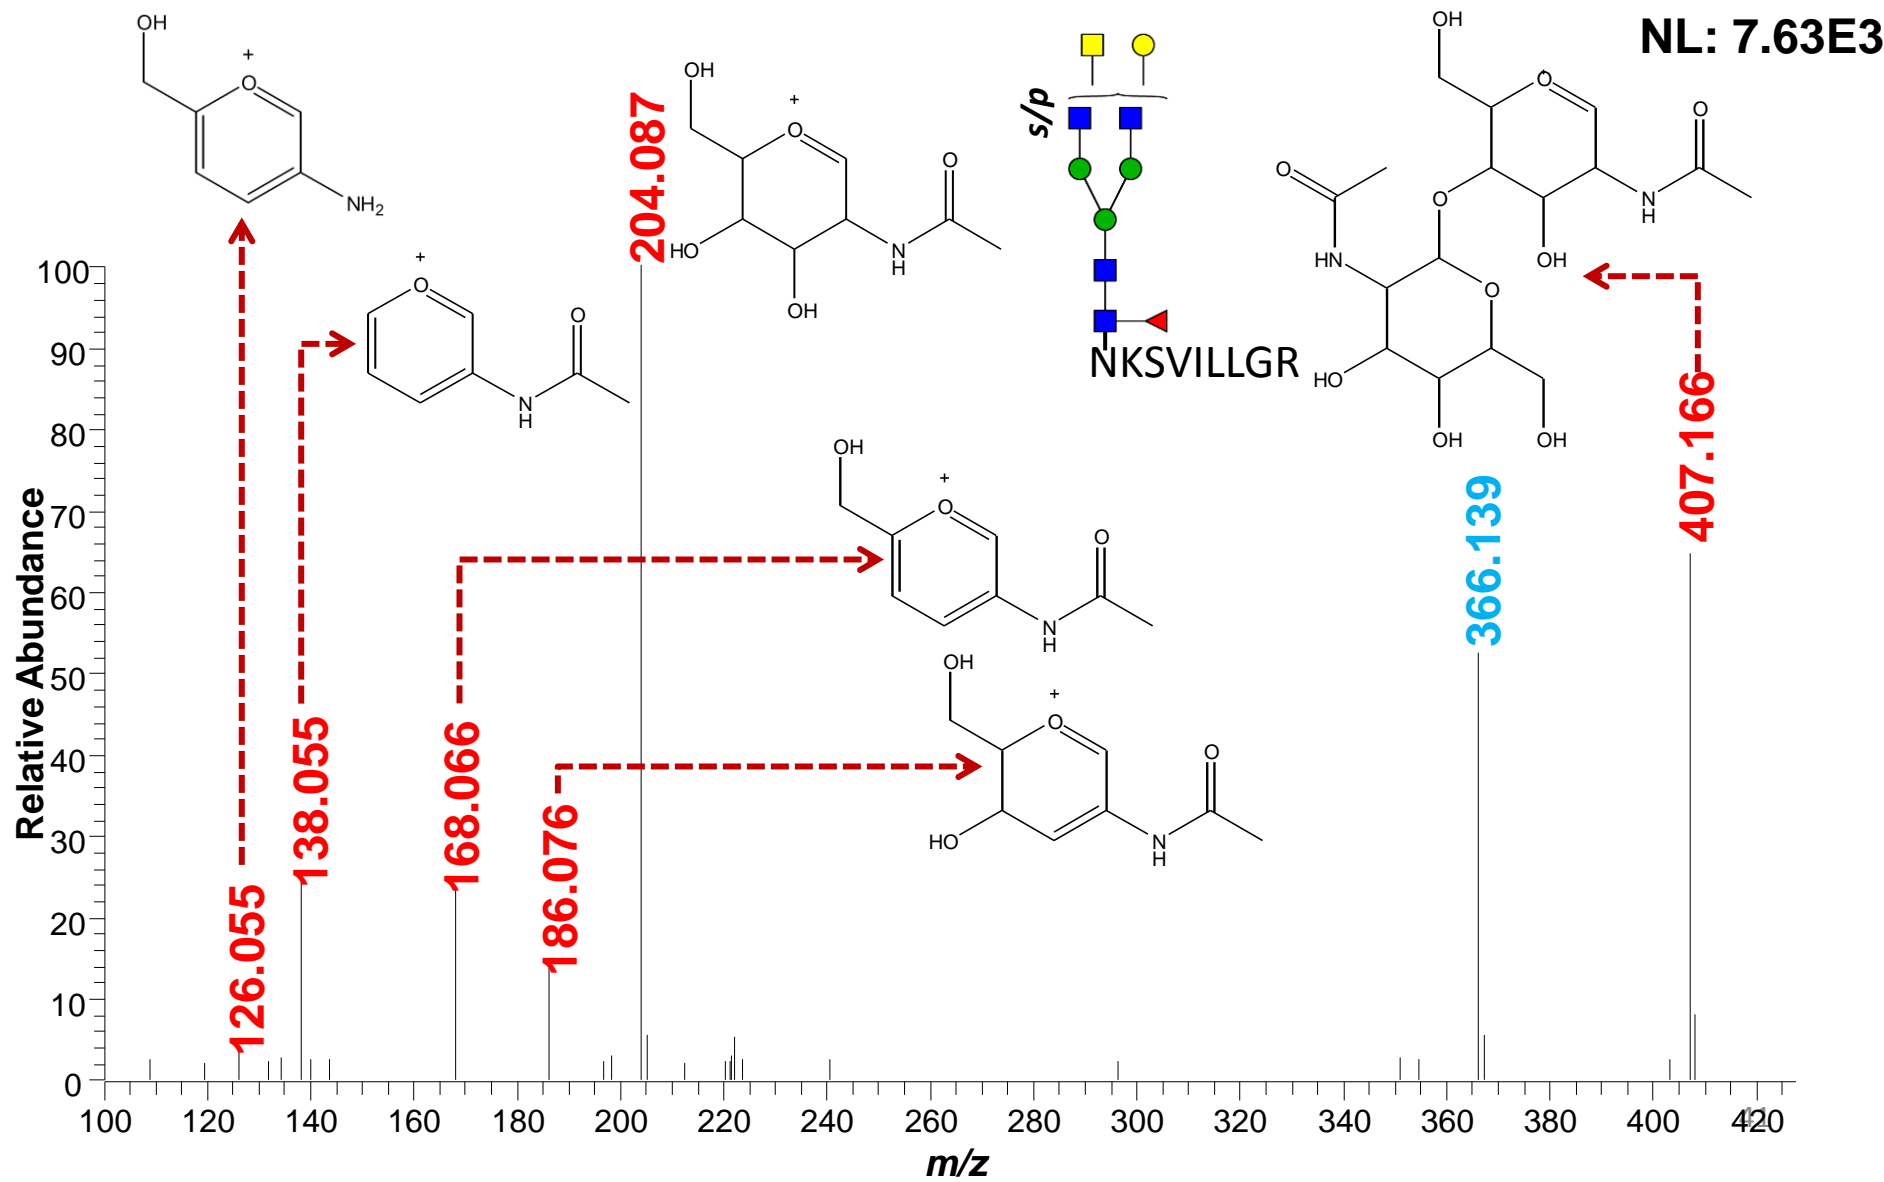

# Supplementary Figure 3. Comparison of identified glycoforms between PSA and PSA at High pI

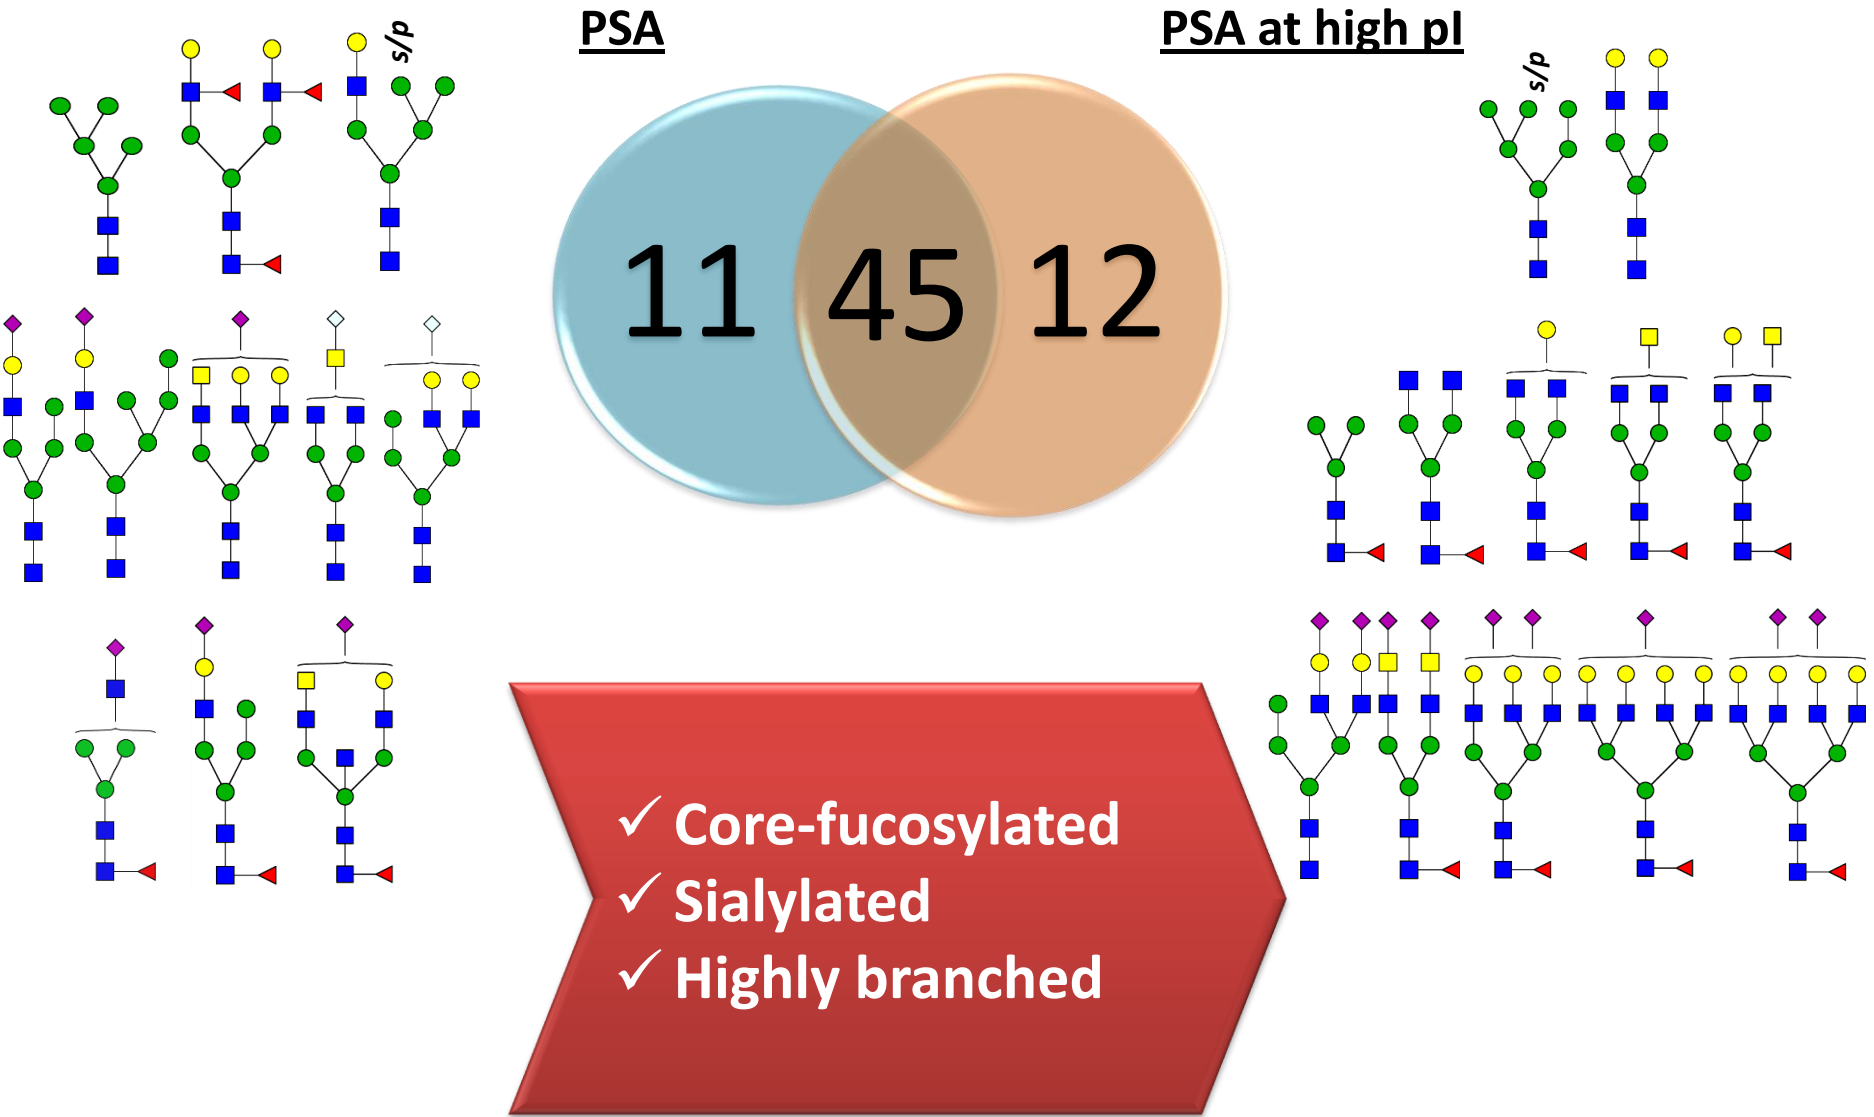

**Supplementary Figure 4A.** Peak areas of glycoforms associated with 3 peptide backbones identified from PSA at normal pl.

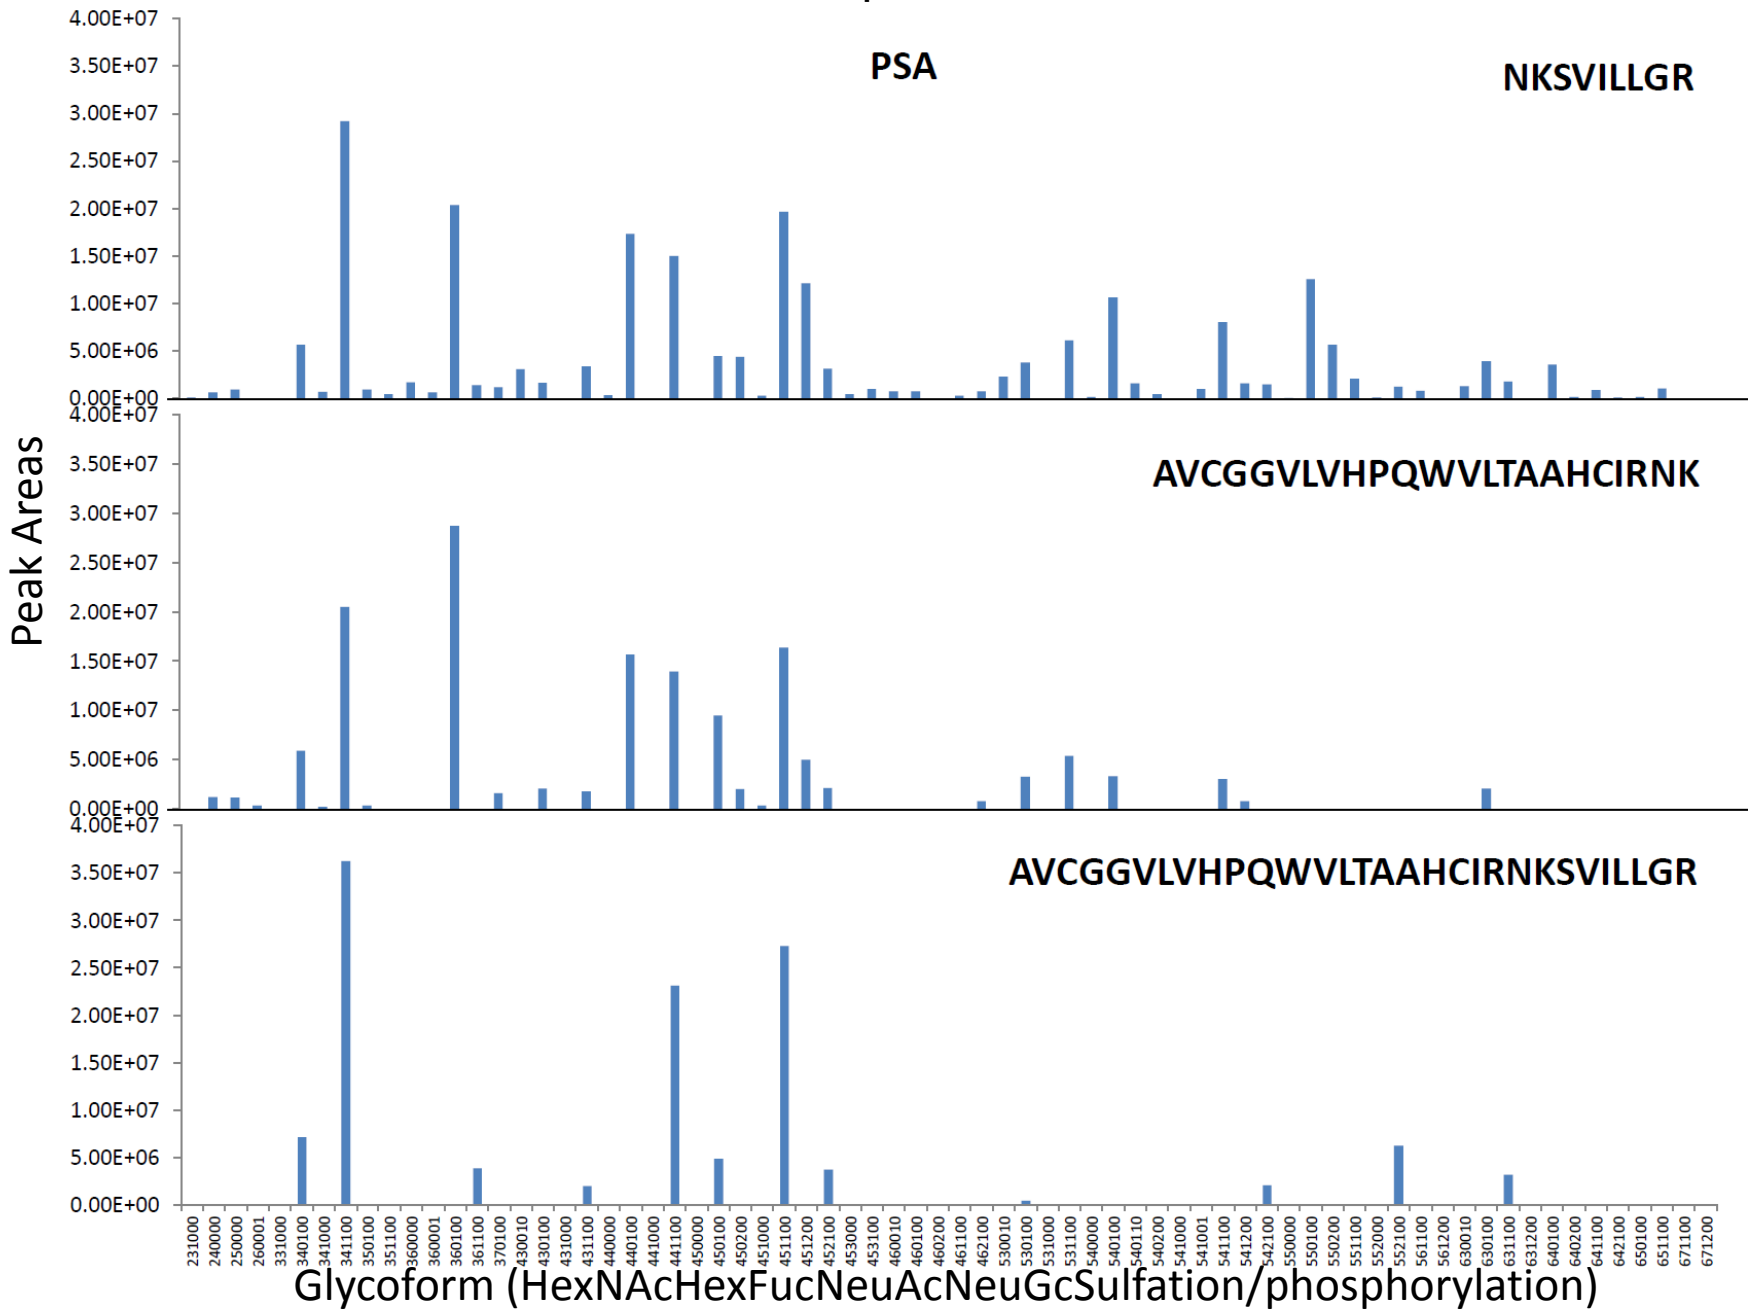

**Supplementary Figure 4B.** Peak areas of glycoforms associated with 3 peptide backbones identified from PSA at high pl.

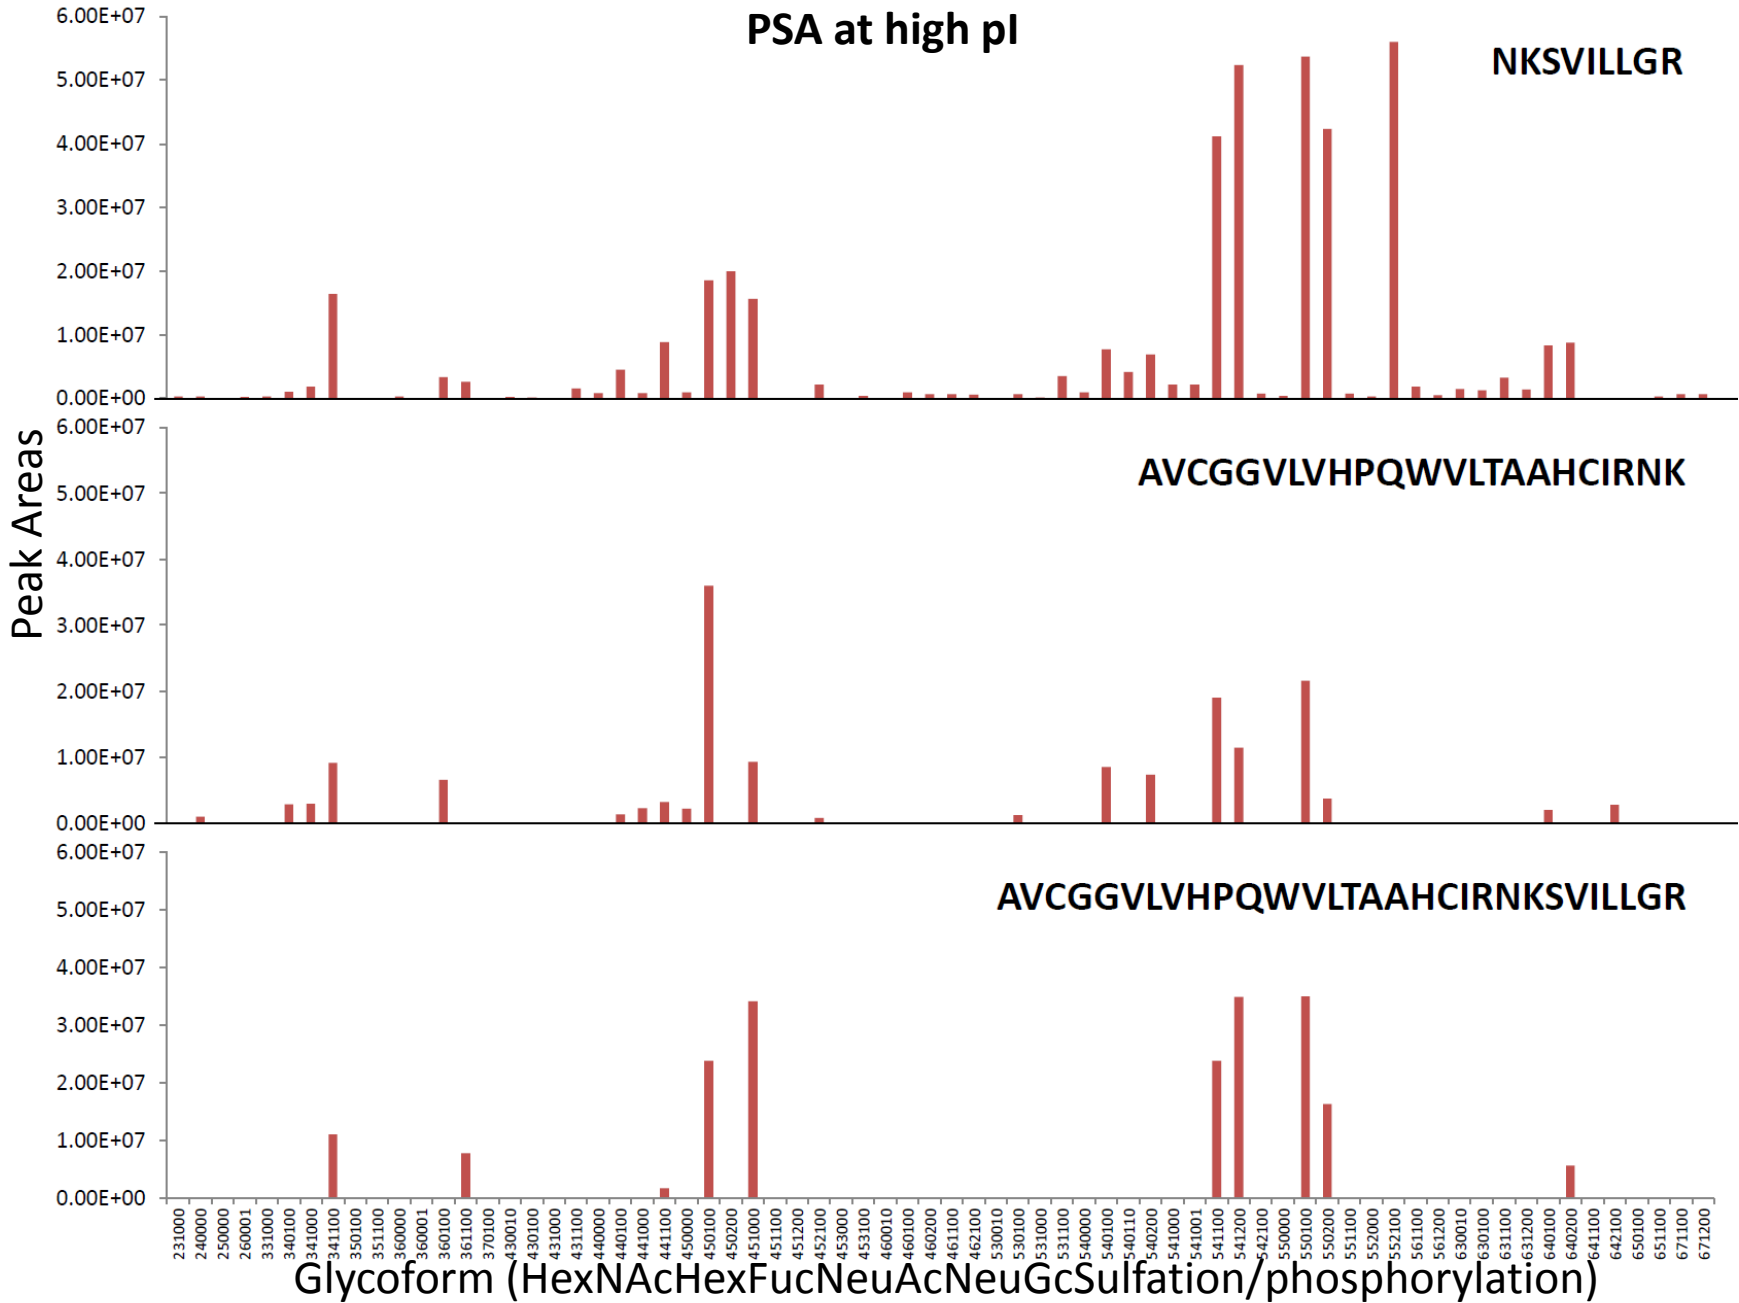

**Supplementary Figure 5A.** Comparisons of total identified glycoforms with the 2012 ABRF study and the published study by Behnken *et al.*

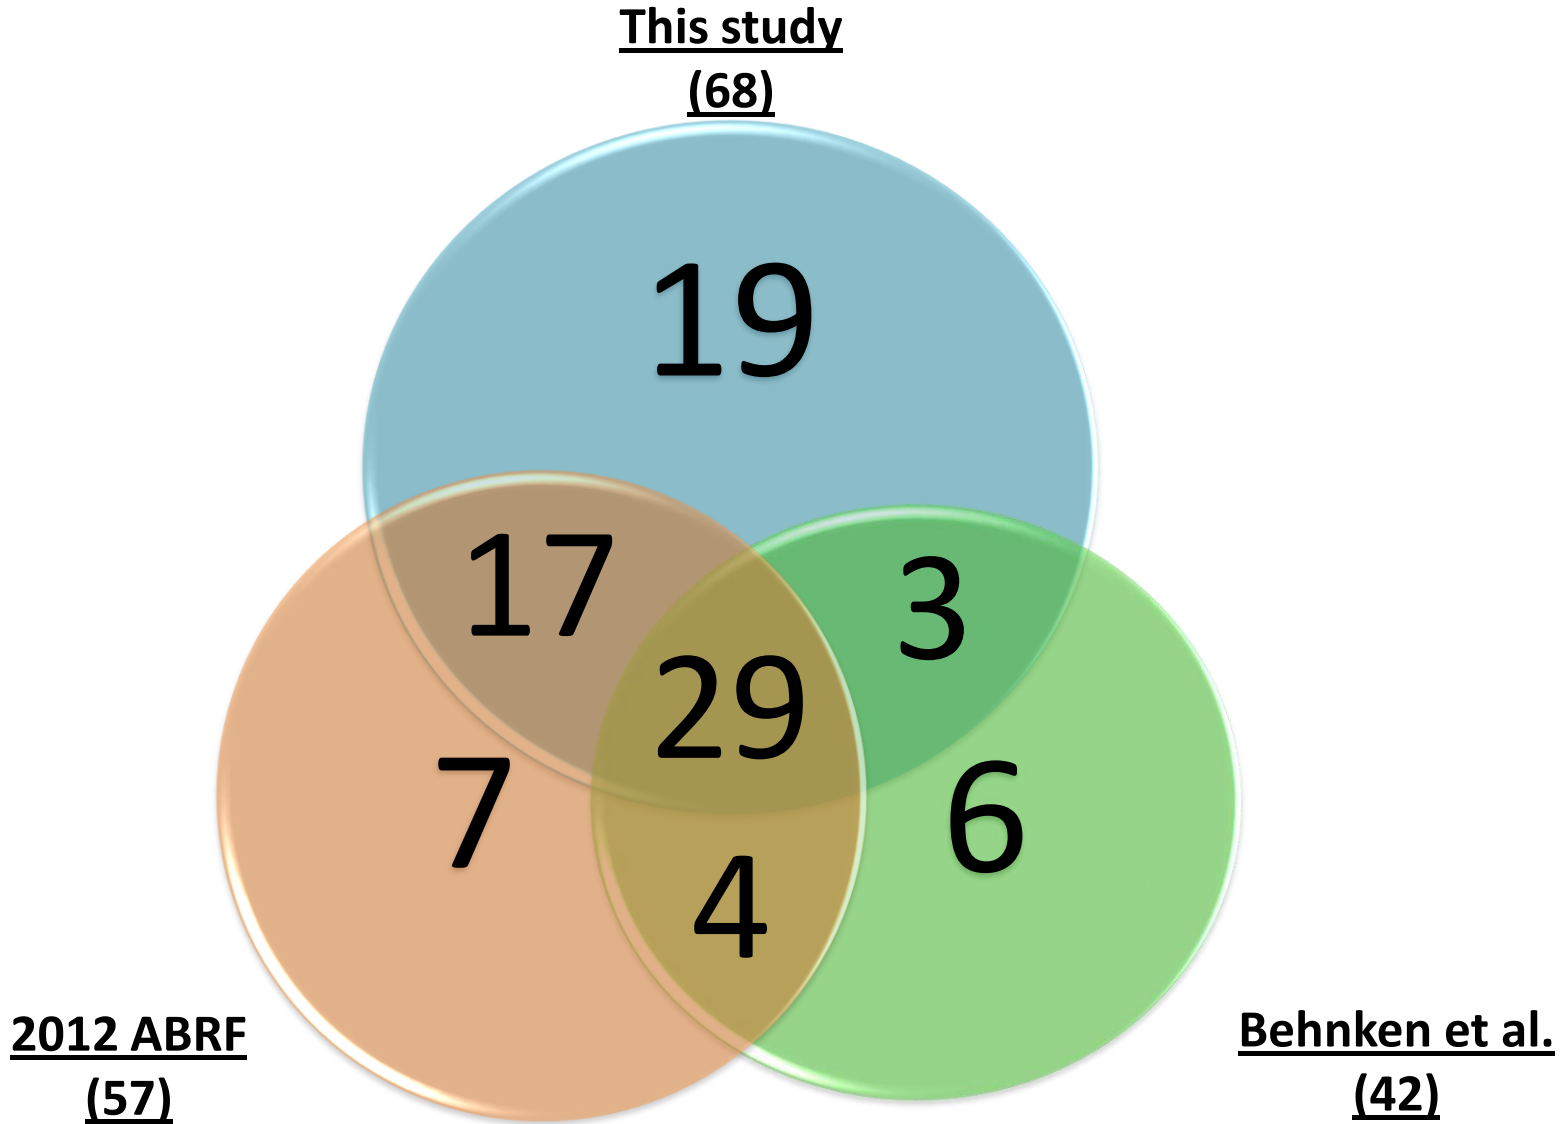

**Supplementary Figure 5B.** Comparisons of quantitative values of 18 major/intermediate glycoforms identified from the 2012 ABRF study and this study.

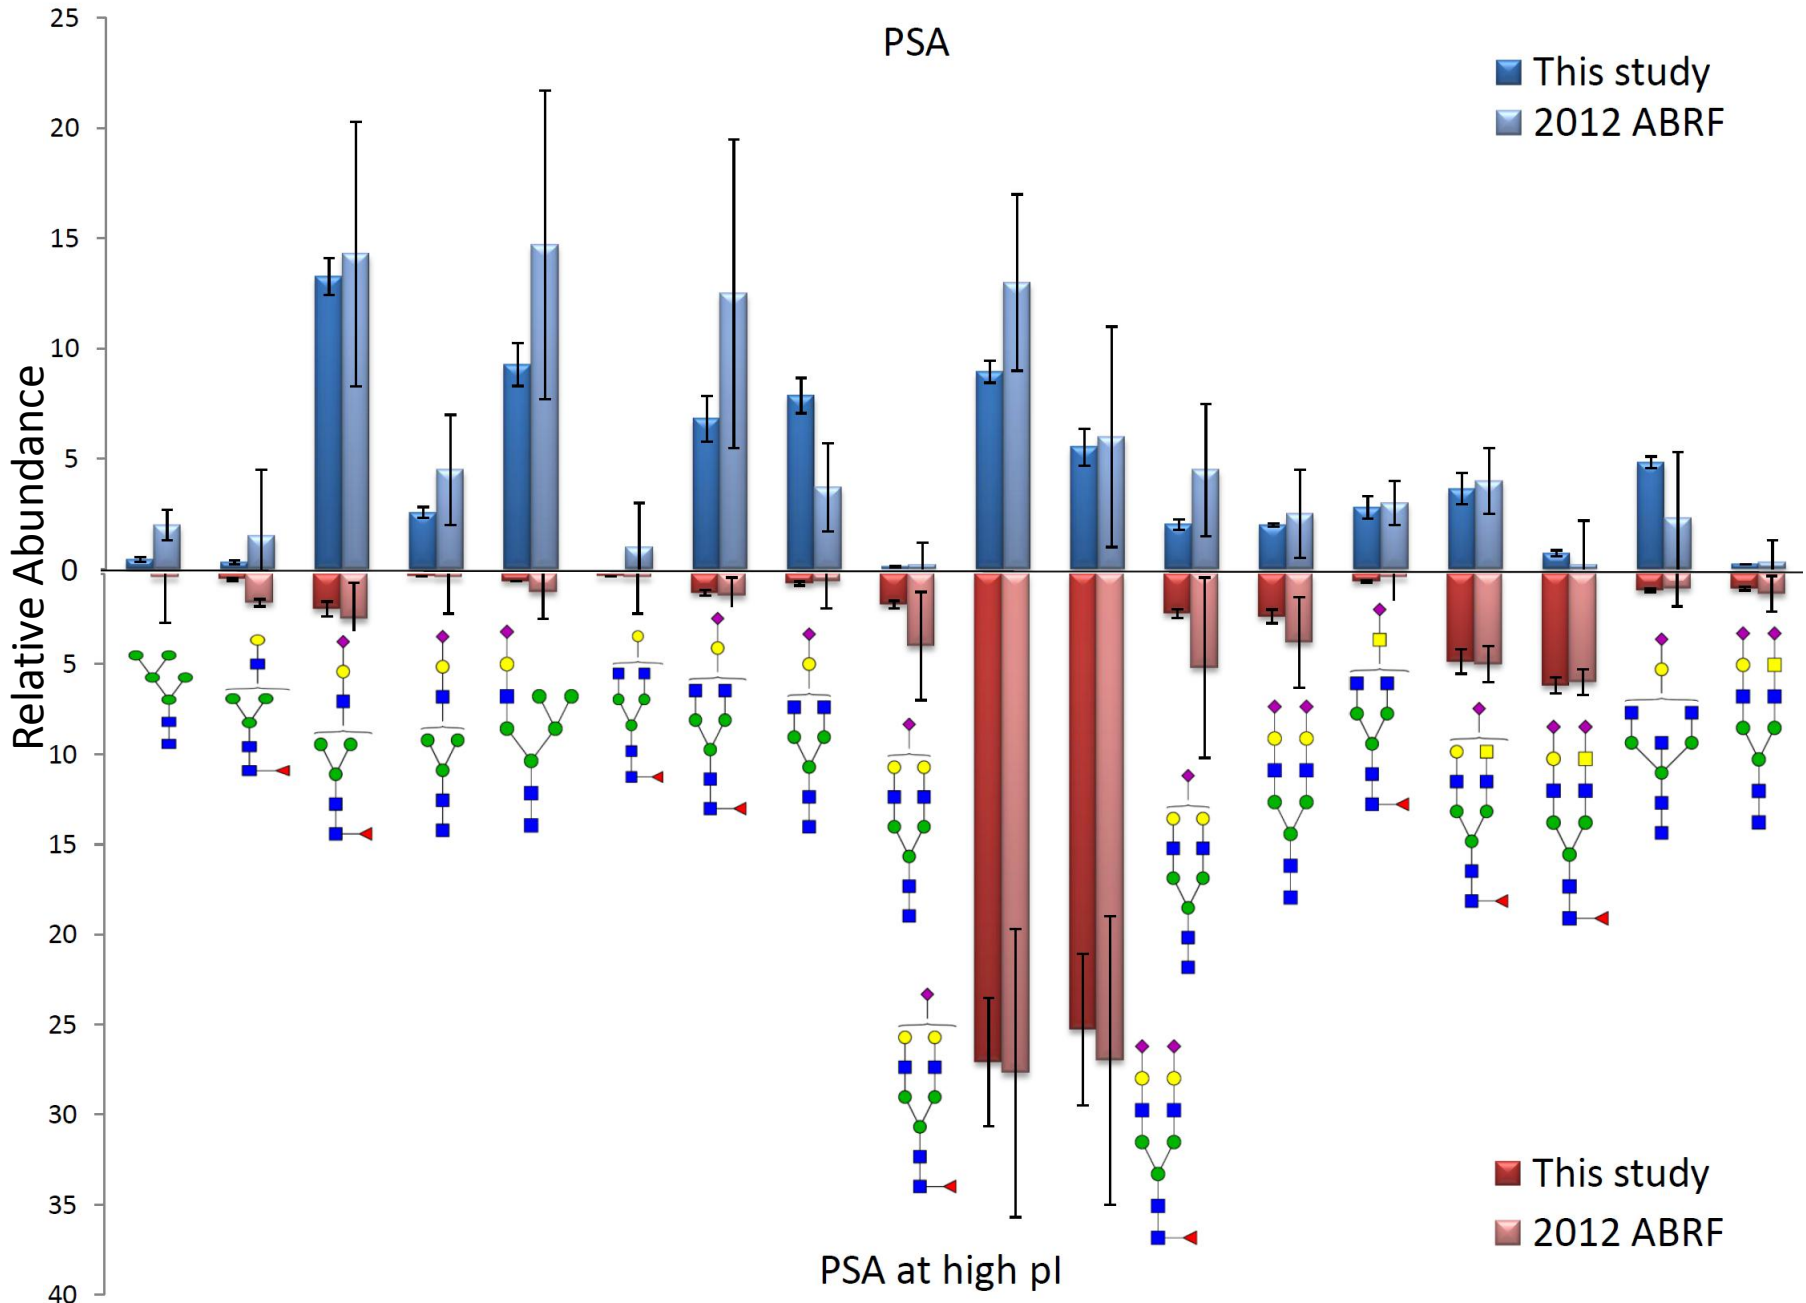

**Supplementary Figure 5C.** Comparisons of quantitative values of 32 common glycoforms identified from the published study by Behnken *et al* and this study.

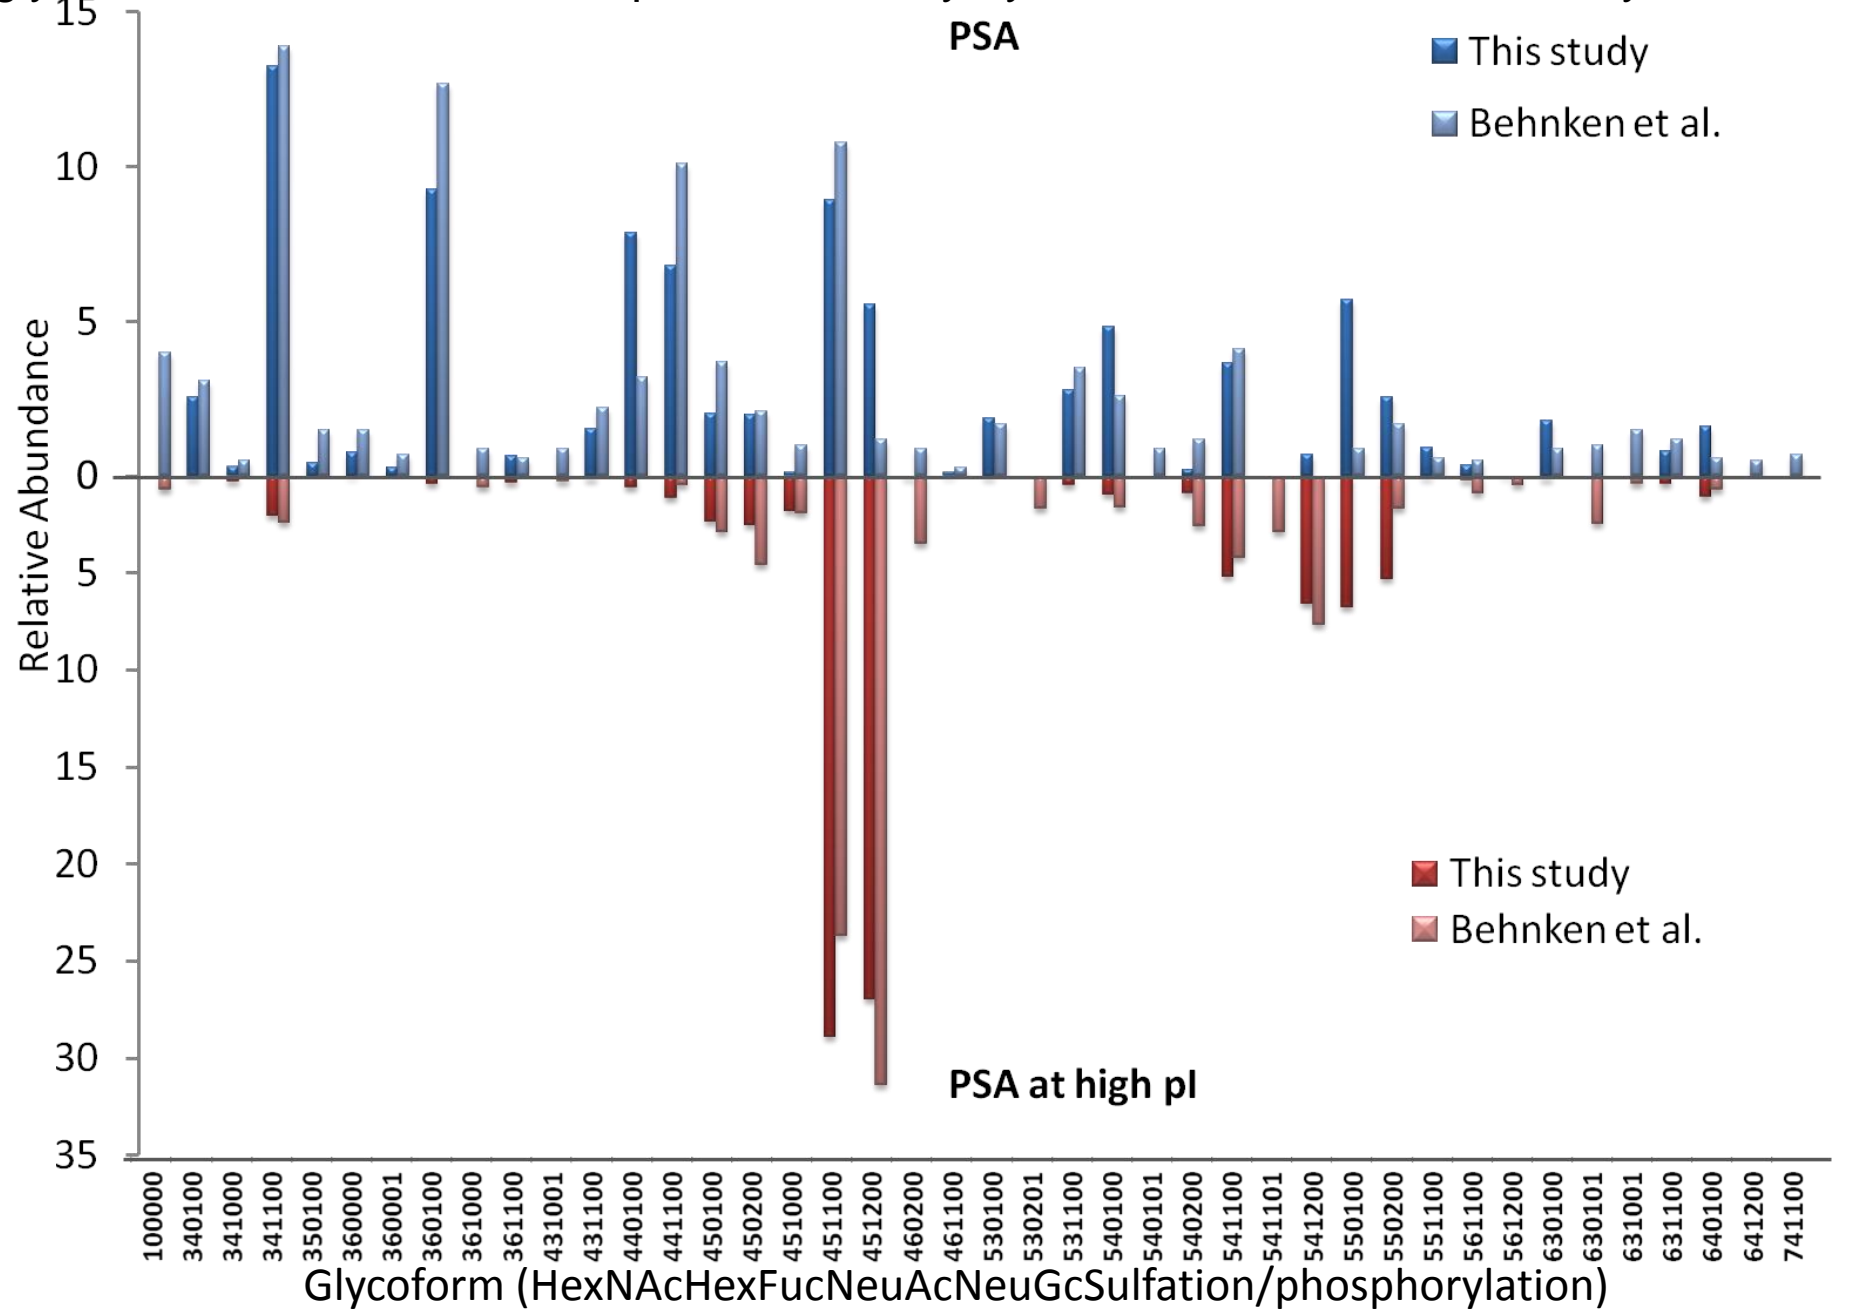

Supplement: pr500575r_si_001.pdf [file pr500575r_si_001.pdf]
